# Supplementary material for: Prevalence of alternative AUG and non-AUG translation initiators and their regulatory effects across plants
Source: HighWire-hosted journal article supplement (doi:10.1101/gr.261834.120), 2020-09-24
Supplement: Supplemental_Table_S1.xlsx [file Supplemental_Table_S1.xlsx]

## Sheet: Sheet1
Supplemental Table S1. List of in vivo translation initiation sites identified in the study.
Solanum lycopersicum				Arabidopsis thaliana
Gene	TIS position relative to 5'end of mRNA	TIS codon	TIS location in genic region	Gene	TIS position relative to 5'end of mRNA	TIS codon	TIS location in genic region
Solyc00g005050.3.1	68	AUG	Annotated TIS	AT1G01050.1	94	AUC	5UTR
Solyc00g005840.3.1	228	AUG	5UTR	AT1G01050.1	40	AUC	5UTR
Solyc00g006490.3.1	101	AUG	5UTR	AT1G01060.1	197	AUG	5UTR
Solyc00g006800.3.1	155	AUG	Annotated TIS	AT1G01060.1	110	AUC	5UTR
Solyc00g006805.1.1	250	AUG	5UTR	AT1G01090.1	139	AUG	Annotated TIS
Solyc00g006810.3.1	220	AUG	Annotated TIS	AT1G01100.1	55	AUG	Annotated TIS
Solyc00g007060.3.1	384	AUG	5UTR	AT1G01100.1	112	GGU	CDS
Solyc00g007110.3.1	2652	AUG	5UTR	AT1G01170.1	34	CUG	5UTR
Solyc00g007270.3.1	140	AUG	Annotated TIS	AT1G01290.1	98	AUG	Annotated TIS
Solyc00g007300.3.1	52	CUG	5UTR	AT1G01300.1	282	AUG	Annotated TIS
Solyc00g007300.3.1	111	AUG	5UTR	AT1G01320.1	16	AUC	5UTR
Solyc00g007300.3.1	459	AUG	Annotated TIS	AT1G01470.1	123	AUG	Annotated TIS
Solyc00g008570.2.1	51	ACG	CDS	AT1G01480.1	157	AUG	Annotated TIS
Solyc00g009020.3.1	140	AUG	Annotated TIS	AT1G01480.1	102	AUA	5UTR
Solyc00g009020.3.1	116	AUC	5UTR	AT1G01490.4	315	AUG	5UTR
Solyc00g009060.3.1	1	AUG	Annotated TIS	AT1G01500.1	228	AUG	Annotated TIS
Solyc00g009080.3.1	1	AUG	Annotated TIS	AT1G01540.2	281	AUG	5UTR
Solyc00g009100.3.1	114	AUG	Annotated TIS	AT1G01540.2	225	AUG	5UTR
Solyc00g009141.1.1	218	AUG	Annotated TIS	AT1G01550.1	275	GUC	5UTR
Solyc00g019740.1.1	73	AUU	CDS	AT1G01550.1	323	AUG	Annotated TIS
Solyc00g024150.3.1	93	AUG	Annotated TIS	AT1G01640.1	247	AUG	Annotated TIS
Solyc00g026160.3.1	390	AUG	CDS	AT1G01730.1	206	AUG	Annotated TIS
Solyc00g049520.2.1	62	AUG	Annotated TIS	AT1G01800.1	151	AUG	Annotated TIS
Solyc00g053440.3.1	44	ACG	5UTR	AT1G01920.1	18	AUG	Annotated TIS
Solyc00g053440.3.1	69	UUG	5UTR	AT1G01930.1	87	AUG	Annotated TIS
Solyc00g057880.3.1	864	AUG	Annotated TIS	AT1G01940.1	197	AUG	Annotated TIS
Solyc00g059500.2.1	162	AUU	5UTR	AT1G01960.1	331	AUG	Annotated TIS
Solyc00g072100.3.1	145	AUG	Annotated TIS	AT1G01960.1	157	AUG	5UTR
Solyc00g099580.2.1	534	AUA	5UTR	AT1G01970.1	91	AUG	5UTR
Solyc00g099580.2.1	404	GUG	5UTR	AT1G01990.1	79	UUG	5UTR
Solyc00g127870.3.1	60	AUG	5UTR	AT1G02060.1	93	AUG	Annotated TIS
Solyc00g136560.3.1	68	AUG	Annotated TIS	AT1G02080.1	80	GUG	CDS
Solyc00g136565.1.1	149	AUG	Annotated TIS	AT1G02080.1	160	AUG	CDS
Solyc00g140060.3.1	275	AUG	CDS	AT1G02090.1	241	AUG	Annotated TIS
Solyc00g140060.3.1	365	AUG	CDS	AT1G02100.1	65	AUG	Annotated TIS
Solyc00g156980.3.1	48	AUG	5UTR	AT1G02110.1	109	AUG	Annotated TIS
Solyc00g179240.2.1	118	AUG	Annotated TIS	AT1G02130.1	132	AUG	Annotated TIS
Solyc00g184350.3.1	110	AUU	5UTR	AT1G02140.1	96	AUG	CDS
Solyc00g184350.3.1	380	AUG	5UTR	AT1G02140.1	56	AUG	Annotated TIS
Solyc00g233480.1.1	1	AUG	Annotated TIS	AT1G02150.1	158	AUG	Annotated TIS
Solyc00g256710.2.1	1	AUG	Annotated TIS	AT1G02180.1	143	AUA	5UTR
Solyc00g272810.1.1	1	AUG	Annotated TIS	AT1G02270.1	265	AUG	CDS
Solyc00g322635.1.1	221	AUG	CDS	AT1G02305.1	129	AUG	Annotated TIS
Solyc01g005000.3.1	101	AUG	Annotated TIS	AT1G02330.1	98	AUG	Annotated TIS
Solyc01g005060.3.1	685	AUG	Annotated TIS	AT1G02370.1	144	AUG	Annotated TIS
Solyc01g005110.3.1	160	AUG	Annotated TIS	AT1G02380.1	242	CUG	5UTR
Solyc01g005120.3.1	119	AUG	5UTR	AT1G02400.1	165	AUG	Annotated TIS
Solyc01g005220.3.1	163	AUG	5UTR	AT1G02410.1	214	AUG	Annotated TIS
Solyc01g005240.3.1	376	UUG	5UTR	AT1G02500.1	551	GAC	CDS
Solyc01g005240.3.1	104	CUG	5UTR	AT1G02500.1	253	CUG	5UTR
Solyc01g005240.3.1	264	AUU	5UTR	AT1G02500.1	675	AUG	CDS
Solyc01g005240.3.1	420	AUG	Annotated TIS	AT1G02500.1	231	CUG	5UTR
Solyc01g005250.3.1	14	CUG	5UTR	AT1G02560.1	261	AUG	Annotated TIS
Solyc01g005250.3.1	71	AUG	Annotated TIS	AT1G02680.1	86	ACG	5UTR
Solyc01g005330.3.1	127	UUG	5UTR	AT1G02690.2	37	CUG	5UTR
Solyc01g005330.3.1	175	AUG	5UTR	AT1G02730.1	132	UUG	5UTR
Solyc01g005390.3.1	155	AUG	Annotated TIS	AT1G02730.1	14	CUC	5UTR
Solyc01g005400.3.1	1099	AUG	5UTR	AT1G02750.1	123	ACG	5UTR
Solyc01g005400.3.1	1014	AUG	5UTR	AT1G02780.1	144	AUG	Annotated TIS
Solyc01g005400.3.1	1136	AUG	Annotated TIS	AT1G02816.1	185	AUG	Annotated TIS
Solyc01g005410.3.1	37	AUG	Annotated TIS	AT1G02816.1	132	GUG	5UTR
Solyc01g005420.2.1	53	AUG	Annotated TIS	AT1G02840.1	196	AUG	Annotated TIS
Solyc01g005440.3.1	19	UUG	5UTR	AT1G02890.1	135	GUG	5UTR
Solyc01g005490.3.1	88	AUG	Annotated TIS	AT1G02920.1	276	AUG	Annotated TIS
Solyc01g005520.3.1	21	AUG	Annotated TIS	AT1G02930.1	223	AUC	5UTR
Solyc01g005540.3.1	135	AUG	Annotated TIS	AT1G02930.1	285	AUG	Annotated TIS
Solyc01g005550.3.1	121	AUU	5UTR	AT1G02960.2	217	AUG	CDS
Solyc01g005550.3.1	357	AUG	Annotated TIS	AT1G02970.1	103	AUG	Annotated TIS
Solyc01g005560.3.1	172	AUG	Annotated TIS	AT1G03040.3	109	AUG	5UTR
Solyc01g005575.1.1	297	AUU	5UTR	AT1G03106.1	122	AUG	5UTR
Solyc01g005575.1.1	129	GUG	5UTR	AT1G03110.1	114	AUG	Annotated TIS
Solyc01g005575.1.1	176	AUG	5UTR	AT1G03110.1	57	CUG	5UTR
Solyc01g005575.1.1	351	AUG	Annotated TIS	AT1G03250.2	163	UUG	5UTR
Solyc01g005590.2.1	80	AUG	Annotated TIS	AT1G03270.1	77	AUG	Annotated TIS
Solyc01g005590.2.1	18	AUU	5UTR	AT1G03330.1	224	UUG	5UTR
Solyc01g005600.3.1	191	AUG	5UTR	AT1G03330.1	267	AUG	Annotated TIS
Solyc01g005600.3.1	139	UUG	5UTR	AT1G03350.1	165	AUG	Annotated TIS
Solyc01g005620.3.1	120	CUG	5UTR	AT1G03350.1	70	ACG	5UTR
Solyc01g005680.3.1	104	AUG	Annotated TIS	AT1G03360.1	143	AUG	CDS
Solyc01g005690.3.1	131	AUU	CDS	AT1G03470.1	59	ACG	5UTR
Solyc01g005710.2.1	58	AUG	Annotated TIS	AT1G03530.1	163	AUA	5UTR
Solyc01g005810.3.1	97	UUG	5UTR	AT1G03600.1	437	AUG	Annotated TIS
Solyc01g005820.3.1	77	AUA	5UTR	AT1G03610.1	79	AUU	5UTR
Solyc01g005820.3.1	129	AUG	5UTR	AT1G03620.1	293	AAG	5UTR
Solyc01g005830.3.1	896	AUA	5UTR	AT1G03630.1	177	AUG	Annotated TIS
Solyc01g005830.3.1	860	GUG	5UTR	AT1G03680.1	200	AUG	Annotated TIS
Solyc01g005910.3.1	3145	AUG	5UTR	AT1G03710.1	103	AUG	Annotated TIS
Solyc01g005910.3.1	4188	AUG	Annotated TIS	AT1G03770.2	201	AUG	Annotated TIS
Solyc01g005930.3.1	45	AUG	5UTR	AT1G03830.2	169	AUG	Annotated TIS
Solyc01g005950.3.1	268	AUG	5UTR	AT1G03860.1	508	AUG	CDS
Solyc01g005980.3.1	247	AUG	CDS	AT1G03860.1	181	GUG	5UTR
Solyc01g005990.3.1	253	AUG	Annotated TIS	AT1G03860.1	234	AUG	Annotated TIS
Solyc01g006010.3.1	209	AUG	Annotated TIS	AT1G03900.1	147	AUG	Annotated TIS
Solyc01g006020.3.1	20	AUG	Annotated TIS	AT1G03900.1	94	ACG	5UTR
Solyc01g006040.3.1	693	AUG	5UTR	AT1G03910.2	115	UUC	CDS
Solyc01g006110.3.1	198	AUG	Annotated TIS	AT1G03950.1	154	AUG	Annotated TIS
Solyc01g006130.3.1	30	AUG	Annotated TIS	AT1G03950.1	108	AUC	5UTR
Solyc01g006140.3.1	19	AUG	Annotated TIS	AT1G03970.1	138	AUG	Annotated TIS
Solyc01g006160.3.1	65	AUU	5UTR	AT1G03970.1	85	UUG	5UTR
Solyc01g006170.3.1	178	AUG	CDS	AT1G04010.1	110	AUG	5UTR
Solyc01g006230.3.1	434	AUG	5UTR	AT1G04020.1	118	AUG	Annotated TIS
Solyc01g006230.3.1	173	AUG	5UTR	AT1G04030.1	175	AUG	5UTR
Solyc01g006240.3.1	75	AUG	Annotated TIS	AT1G04040.1	69	AUG	Annotated TIS
Solyc01g006250.2.1	115	AUG	5UTR	AT1G04080.3	156	ACG	5UTR
Solyc01g006260.3.1	85	CUG	5UTR	AT1G04080.3	102	UUG	5UTR
Solyc01g006280.3.1	487	AUG	Annotated TIS	AT1G04160.1	254	AUG	5UTR
Solyc01g006280.3.1	420	UUG	5UTR	AT1G04170.1	206	UUG	5UTR
Solyc01g006300.3.1	67	AUG	Annotated TIS	AT1G04170.1	170	CUG	5UTR
Solyc01g006320.3.1	37	AUG	Annotated TIS	AT1G04170.1	429	GUC	CDS
Solyc01g006330.3.1	90	AUG	Annotated TIS	AT1G04170.1	264	AUG	Annotated TIS
Solyc01g006330.3.1	23	CUG	5UTR	AT1G04190.1	71	GUG	5UTR
Solyc01g006430.3.1	46	AUA	5UTR	AT1G04190.1	169	AUG	Annotated TIS
Solyc01g006450.3.1	65	AUG	5UTR	AT1G04290.1	182	AUG	Annotated TIS
Solyc01g006450.3.1	164	AUG	Annotated TIS	AT1G04300.3	158	UUG	5UTR
Solyc01g006500.3.1	33	AUG	Annotated TIS	AT1G04340.1	72	ACG	5UTR
Solyc01g006510.3.1	168	AUG	5UTR	AT1G04340.1	125	AUG	Annotated TIS
Solyc01g006565.1.1	99	AUG	Annotated TIS	AT1G04400.1	443	AUA	5UTR
Solyc01g006630.3.1	201	AUG	Annotated TIS	AT1G04400.1	545	AUG	5UTR
Solyc01g006690.3.1	175	AUG	Annotated TIS	AT1G04400.1	496	CUG	5UTR
Solyc01g006690.3.1	94	AUG	5UTR	AT1G04410.1	144	AUC	5UTR
Solyc01g006710.3.1	1045	AUG	5UTR	AT1G04410.1	192	AUG	Annotated TIS
Solyc01g006800.3.1	615	AUG	5UTR	AT1G04430.1	345	GUG	5UTR
Solyc01g006810.3.1	170	AUG	5UTR	AT1G04430.1	410	CUG	5UTR
Solyc01g006810.3.1	133	AUG	5UTR	AT1G04440.1	286	AUG	5UTR
Solyc01g006825.1.1	1	AUG	Annotated TIS	AT1G04480.1	237	CUG	CDS
Solyc01g006825.1.1	56	AUG	CDS	AT1G04480.1	186	AUG	Annotated TIS
Solyc01g006830.3.1	462	AUG	Annotated TIS	AT1G04510.1	213	CGA	5UTR
Solyc01g006880.3.1	186	AUG	5UTR	AT1G04530.1	258	AUU	5UTR
Solyc01g006890.3.1	234	AUG	5UTR	AT1G04680.1	145	AUU	5UTR
Solyc01g006900.3.1	211	AUG	Annotated TIS	AT1G04690.1	220	AUG	Annotated TIS
Solyc01g006980.3.1	70	AUG	Annotated TIS	AT1G04710.1	57	AUG	Annotated TIS
Solyc01g006990.3.1	50	AUG	CDS	AT1G04730.1	84	AUG	Annotated TIS
Solyc01g006990.3.1	1	AUG	Annotated TIS	AT1G04750.1	176	AUU	5UTR
Solyc01g006990.3.1	158	AUG	CDS	AT1G04750.1	226	AUG	Annotated TIS
Solyc01g007000.3.1	70	AUG	Annotated TIS	AT1G04770.1	86	AUG	CDS
Solyc01g007010.2.1	134	AUG	Annotated TIS	AT1G04790.1	122	AUG	Annotated TIS
Solyc01g007025.1.1	1	AUG	Annotated TIS	AT1G04810.1	225	AUG	Annotated TIS
Solyc01g007070.3.1	869	AUG	Annotated TIS	AT1G04820.1	229	AUA	5UTR
Solyc01g007100.3.1	73	AUG	Annotated TIS	AT1G04820.1	282	AUG	Annotated TIS
Solyc01g007110.3.1	215	AUG	Annotated TIS	AT1G04830.2	132	CUG	5UTR
Solyc01g007150.3.1	138	CUG	5UTR	AT1G04850.1	184	AUC	5UTR
Solyc01g007150.3.1	189	AUG	Annotated TIS	AT1G04850.1	235	AUG	Annotated TIS
Solyc01g007220.3.1	1	AUG	Annotated TIS	AT1G04870.2	224	AUG	Annotated TIS
Solyc01g007230.3.1	1	AUG	Annotated TIS	AT1G04870.2	168	UUG	5UTR
Solyc01g007740.3.1	46	AUG	Annotated TIS	AT1G04870.2	150	AUU	5UTR
Solyc01g007750.3.1	388	AUG	CDS	AT1G04900.1	72	AUG	Annotated TIS
Solyc01g007760.3.1	78	AUG	Annotated TIS	AT1G04910.1	258	AUU	5UTR
Solyc01g007770.2.1	67	AUG	Annotated TIS	AT1G04960.2	196	AUG	5UTR
Solyc01g007790.3.1	168	AUG	CDS	AT1G04970.1	129	AUG	Annotated TIS
Solyc01g007810.1.1	66	AUG	CDS	AT1G04985.1	737	AUG	Annotated TIS
Solyc01g007810.1.1	1	AUG	Annotated TIS	AT1G04985.1	684	AUU	5UTR
Solyc01g007850.2.1	1	AUG	Annotated TIS	AT1G04990.1	331	AUG	5UTR
Solyc01g007860.3.1	24	AUG	Annotated TIS	AT1G04990.1	195	AUG	5UTR
Solyc01g007910.3.1	168	AUG	Annotated TIS	AT1G05000.2	122	AUG	Annotated TIS
Solyc01g007920.2.1	210	AUG	Annotated TIS	AT1G05055.1	78	AUG	CDS
Solyc01g007920.2.1	159	GUG	5UTR	AT1G05070.1	272	AUG	Annotated TIS
Solyc01g008000.3.1	154	GUG	5UTR	AT1G05180.1	179	AUG	Annotated TIS
Solyc01g008000.3.1	221	AUG	Annotated TIS	AT1G05190.1	116	AUG	Annotated TIS
Solyc01g008060.3.1	173	UUG	5UTR	AT1G05230.1	948	GUA	Annotated TIS
Solyc01g008060.3.1	215	AUG	5UTR	AT1G05270.1	463	AUG	Annotated TIS
Solyc01g008070.3.1	40	AUG	CDS	AT1G05270.1	677	AUG	CDS
Solyc01g008100.3.1	138	AUC	5UTR	AT1G05340.1	272	AUG	Annotated TIS
Solyc01g008110.3.1	193	AUG	Annotated TIS	AT1G05340.1	225	AUC	5UTR
Solyc01g008110.3.1	101	AUG	5UTR	AT1G05370.1	190	AUG	Annotated TIS
Solyc01g008120.3.1	233	AUG	5UTR	AT1G05380.1	255	AUG	5UTR
Solyc01g008120.3.1	152	ACG	5UTR	AT1G05380.1	139	ACG	5UTR
Solyc01g008170.3.1	99	AUG	Annotated TIS	AT1G05385.1	113	AUG	Annotated TIS
Solyc01g008180.3.1	502	AUG	Annotated TIS	AT1G05410.1	210	AUG	Annotated TIS
Solyc01g008230.3.1	1	AUG	Annotated TIS	AT1G05410.1	131	AUG	5UTR
Solyc01g008270.3.1	113	AUG	Annotated TIS	AT1G05430.1	121	AUG	5UTR
Solyc01g008310.3.1	130	AUG	CDS	AT1G05430.1	193	AUG	Annotated TIS
Solyc01g008330.3.1	234	AUG	Annotated TIS	AT1G05500.1	180	AUG	Annotated TIS
Solyc01g008330.3.1	189	AUU	5UTR	AT1G05520.1	263	AUC	5UTR
Solyc01g008340.3.1	148	AUG	Annotated TIS	AT1G05520.1	316	AUG	Annotated TIS
Solyc01g008370.3.1	82	AUG	CDS	AT1G05630.1	48	AUG	5UTR
Solyc01g008530.3.1	101	AUA	5UTR	AT1G05670.1	157	AUG	5UTR
Solyc01g008530.3.1	156	AUG	Annotated TIS	AT1G05690.1	415	AUG	5UTR
Solyc01g008550.4.1	168	AUG	Annotated TIS	AT1G05710.1	1334	CUC	CDS
Solyc01g008560.3.1	151	AUG	CDS	AT1G05710.1	204	ACG	5UTR
Solyc01g008560.3.1	105	AUG	Annotated TIS	AT1G05710.1	136	AUC	5UTR
Solyc01g008700.3.1	153	AUG	Annotated TIS	AT1G05710.1	247	CUG	5UTR
Solyc01g008700.3.1	76	AUA	5UTR	AT1G05710.1	456	AUA	5UTR
Solyc01g008770.3.1	1149	AUG	5UTR	AT1G05830.1	246	AUU	5UTR
Solyc01g008780.3.1	329	AUG	Annotated TIS	AT1G05840.1	89	ACG	5UTR
Solyc01g008780.3.1	251	AUG	5UTR	AT1G05840.1	134	AUG	Annotated TIS
Solyc01g008780.3.1	181	AUA	5UTR	AT1G05850.1	202	ACG	5UTR
Solyc01g008780.3.1	226	AUG	5UTR	AT1G05850.1	263	CUG	5UTR
Solyc01g008840.3.1	193	AUG	Annotated TIS	AT1G05850.1	325	AUG	Annotated TIS
Solyc01g008850.3.1	211	AUG	CDS	AT1G05860.1	79	GCG	CDS
Solyc01g008850.3.1	52	AUG	CDS	AT1G05870.1	99	GUU	5UTR
Solyc01g008920.3.1	113	AUG	Annotated TIS	AT1G05870.1	63	AUC	5UTR
Solyc01g008930.4.1	115	AUG	5UTR	AT1G05890.2	376	AUG	Annotated TIS
Solyc01g008940.2.1	1	AUG	Annotated TIS	AT1G05890.2	259	AUA	5UTR
Solyc01g008950.3.1	54	CUG	5UTR	AT1G05910.1	86	CUG	5UTR
Solyc01g008950.3.1	107	AUG	Annotated TIS	AT1G05910.1	138	AUG	5UTR
Solyc01g008950.3.1	129	AUC	CDS	AT1G05940.1	59	AUG	Annotated TIS
Solyc01g008970.3.1	1	AUG	Annotated TIS	AT1G05970.2	112	AUG	Annotated TIS
Solyc01g009010.3.1	1	AUG	Annotated TIS	AT1G06000.1	93	AUG	Annotated TIS
Solyc01g009020.3.1	1	AUG	Annotated TIS	AT1G06040.1	239	AAG	5UTR
Solyc01g009030.3.1	104	AUG	Annotated TIS	AT1G06040.1	276	CUG	5UTR
Solyc01g009050.3.1	60	AUG	Annotated TIS	AT1G06040.1	325	AUG	Annotated TIS
Solyc01g009080.3.1	72	AUG	Annotated TIS	AT1G06060.1	131	AUG	Annotated TIS
Solyc01g009090.3.1	126	AUG	Annotated TIS	AT1G06070.1	220	CUG	5UTR
Solyc01g009090.3.1	70	CUG	5UTR	AT1G06070.1	160	AUG	5UTR
Solyc01g009100.3.1	125	UUG	5UTR	AT1G06070.1	360	AUG	Annotated TIS
Solyc01g009100.3.1	179	AUG	Annotated TIS	AT1G06130.1	303	AAG	CDS
Solyc01g009120.3.1	87	AUG	Annotated TIS	AT1G06130.1	277	AUU	5UTR
Solyc01g009160.2.1	89	UUG	5UTR	AT1G06140.1	120	AUG	CDS
Solyc01g009170.3.1	39	AUG	Annotated TIS	AT1G06143.1	154	AUG	CDS
Solyc01g009180.3.1	69	AUG	CDS	AT1G06150.2	168	AUG	5UTR
Solyc01g009245.1.1	119	AUG	CDS	AT1G06150.2	78	GUG	5UTR
Solyc01g009245.1.1	24	AUG	Annotated TIS	AT1G06150.2	105	UUG	5UTR
Solyc01g009280.3.1	23	AUG	Annotated TIS	AT1G06150.2	129	AUG	5UTR
Solyc01g009300.3.1	306	AUG	5UTR	AT1G06150.2	57	GUG	5UTR
Solyc01g009300.3.1	328	AUG	5UTR	AT1G06200.2	176	AUG	CDS
Solyc01g009420.3.1	78	GUG	5UTR	AT1G06200.2	102	ACG	CDS
Solyc01g009430.3.1	69	UAC	5UTR	AT1G06210.1	182	AUG	Annotated TIS
Solyc01g009430.3.1	165	AUG	Annotated TIS	AT1G06210.1	137	ACG	5UTR
Solyc01g009450.2.1	79	CUG	5UTR	AT1G06220.1	81	GGC	5UTR
Solyc01g009450.2.1	362	AUG	Annotated TIS	AT1G06230.1	128	AUG	5UTR
Solyc01g009450.2.1	200	AUC	5UTR	AT1G06240.1	72	AUG	Annotated TIS
Solyc01g009500.3.1	404	AUG	Annotated TIS	AT1G06290.1	219	UCG	CDS
Solyc01g009520.3.1	171	AUG	Annotated TIS	AT1G06390.1	115	AUG	Annotated TIS
Solyc01g009630.3.1	218	AUG	Annotated TIS	AT1G06410.1	282	AUG	Annotated TIS
Solyc01g009750.3.1	203	AUG	Annotated TIS	AT1G06430.1	220	AUG	Annotated TIS
Solyc01g009750.3.1	157	CUG	5UTR	AT1G06450.1	27	AUG	5UTR
Solyc01g009760.3.1	156	AUG	Annotated TIS	AT1G06450.1	88	AAC	CDS
Solyc01g009780.3.1	40	CUG	5UTR	AT1G06470.1	58	AUG	5UTR
Solyc01g009780.3.1	98	AUG	Annotated TIS	AT1G06475.1	80	AUG	5UTR
Solyc01g009820.3.1	134	AUG	Annotated TIS	AT1G06500.1	126	AUG	Annotated TIS
Solyc01g009860.3.1	92	AUG	CDS	AT1G06500.1	71	CUG	5UTR
Solyc01g009860.3.1	67	AUG	Annotated TIS	AT1G06515.1	49	CUG	5UTR
Solyc01g009970.3.1	89	AUG	CDS	AT1G06515.1	148	AUG	Annotated TIS
Solyc01g009990.3.1	163	AUG	Annotated TIS	AT1G06515.1	101	CUG	5UTR
Solyc01g010000.3.1	83	CUG	5UTR	AT1G06530.1	127	AUC	5UTR
Solyc01g010000.3.1	135	AUG	Annotated TIS	AT1G06550.1	73	AUG	5UTR
Solyc01g010020.3.1	20	AUG	CDS	AT1G06550.1	33	AUG	5UTR
Solyc01g010020.3.1	1	AUG	Annotated TIS	AT1G06570.1	1	AUG	Annotated TIS
Solyc01g010030.3.1	545	AUG	5UTR	AT1G06630.1	97	AUG	Annotated TIS
Solyc01g010060.2.1	190	AUG	CDS	AT1G06660.1	220	CUG	5UTR
Solyc01g010180.3.1	196	AUG	Annotated TIS	AT1G06660.1	272	AUG	Annotated TIS
Solyc01g010270.3.1	173	AUA	5UTR	AT1G06690.1	132	AUG	Annotated TIS
Solyc01g010310.3.1	1	AUG	Annotated TIS	AT1G06700.1	450	AUG	Annotated TIS
Solyc01g010430.3.1	128	AUG	Annotated TIS	AT1G06700.1	255	CUG	5UTR
Solyc01g010440.3.1	157	AUG	Annotated TIS	AT1G06700.1	343	AUC	5UTR
Solyc01g010460.3.1	734	AUG	5UTR	AT1G06720.2	203	AUG	Annotated TIS
Solyc01g010480.3.1	771	AUA	5UTR	AT1G06720.2	154	ACG	5UTR
Solyc01g010540.3.1	77	AUG	Annotated TIS	AT1G06760.1	86	AUC	5UTR
Solyc01g010580.3.1	78	AUG	Annotated TIS	AT1G06770.1	334	AUG	5UTR
Solyc01g010640.3.1	71	AUG	Annotated TIS	AT1G06790.1	175	AUG	5UTR
Solyc01g010660.3.1	176	AUG	Annotated TIS	AT1G06870.1	321	AUG	Annotated TIS
Solyc01g010660.3.1	80	AUG	5UTR	AT1G06890.1	244	AUU	5UTR
Solyc01g010700.3.1	149	AUG	Annotated TIS	AT1G06890.1	297	AUG	5UTR
Solyc01g010750.3.1	32	AUG	Annotated TIS	AT1G06890.1	184	AUA	5UTR
Solyc01g010810.3.1	1465	AUG	Annotated TIS	AT1G06900.1	54	CUG	5UTR
Solyc01g010820.3.1	87	AUG	5UTR	AT1G06900.1	111	AUG	Annotated TIS
Solyc01g010860.3.1	342	AUG	5UTR	AT1G06950.1	1137	CUC	CDS
Solyc01g010880.3.1	158	AUG	5UTR	AT1G06950.1	91	AUU	5UTR
Solyc01g010940.3.1	203	AUG	Annotated TIS	AT1G06960.1	165	AUG	CDS
Solyc01g010940.3.1	146	AUU	5UTR	AT1G06960.1	113	AUG	Annotated TIS
Solyc01g011000.3.1	117	AUG	Annotated TIS	AT1G07010.3	12	AUG	5UTR
Solyc01g011010.3.1	160	AUG	Annotated TIS	AT1G07010.3	70	AUG	Annotated TIS
Solyc01g011040.3.1	194	AUG	5UTR	AT1G07030.1	54	UUG	5UTR
Solyc01g011040.3.1	272	AUG	Annotated TIS	AT1G07030.1	106	AUG	5UTR
Solyc01g011040.3.1	132	UUG	5UTR	AT1G07040.1	283	AUG	5UTR
Solyc01g011340.3.1	353	AUG	Annotated TIS	AT1G07040.1	129	AUG	5UTR
Solyc01g011350.3.1	644	AUG	5UTR	AT1G07040.1	353	AUG	Annotated TIS
Solyc01g011510.3.1	199	AUG	CDS	AT1G07070.1	95	GUG	CDS
Solyc01g011510.3.1	33	AUG	CDS	AT1G07080.1	93	AUG	Annotated TIS
Solyc01g011510.3.1	75	AUG	CDS	AT1G07090.1	103	AUG	Annotated TIS
Solyc01g014140.3.1	40	AUG	Annotated TIS	AT1G07140.1	149	AUG	Annotated TIS
Solyc01g014180.3.1	94	AUG	CDS	AT1G07140.1	126	ACG	5UTR
Solyc01g014230.3.1	396	AUG	Annotated TIS	AT1G07140.1	314	CUU	CDS
Solyc01g015020.3.1	38	AUA	5UTR	AT1G07140.1	242	GUU	CDS
Solyc01g016470.3.1	202	AUG	Annotated TIS	AT1G07170.1	272	AUG	Annotated TIS
Solyc01g017530.1.1	93	AUU	CDS	AT1G07170.1	230	AUC	5UTR
Solyc01g017600.3.1	85	AUG	CDS	AT1G07180.1	194	GUG	5UTR
Solyc01g017740.1.1	59	ACG	CDS	AT1G07180.1	311	AUG	Annotated TIS
Solyc01g017740.1.1	85	UUG	CDS	AT1G07210.1	49	CUG	5UTR
Solyc01g020190.2.1	132	AUG	Annotated TIS	AT1G07210.1	105	AUG	Annotated TIS
Solyc01g022750.3.1	55	AUG	Annotated TIS	AT1G07220.1	271	AUG	Annotated TIS
Solyc01g022750.3.1	169	AUG	CDS	AT1G07220.1	204	AUG	5UTR
Solyc01g028805.1.1	1032	AUG	Annotated TIS	AT1G07320.1	224	AUG	Annotated TIS
Solyc01g028810.3.1	353	ACG	5UTR	AT1G07350.1	177	AUG	CDS
Solyc01g028810.3.1	396	AUG	Annotated TIS	AT1G07370.1	168	AUG	Annotated TIS
Solyc01g028830.3.1	282	AUG	5UTR	AT1G07400.1	169	AUU	5UTR
Solyc01g028860.3.1	256	AUG	Annotated TIS	AT1G07420.1	285	GUG	5UTR
Solyc01g028870.3.1	71	AUG	5UTR	AT1G07420.1	356	AUG	Annotated TIS
Solyc01g028870.3.1	142	AUG	Annotated TIS	AT1G07470.1	129	AUU	5UTR
Solyc01g028900.3.1	158	AUG	5UTR	AT1G07480.3	118	AUU	5UTR
Solyc01g028900.3.1	232	AUG	Annotated TIS	AT1G07510.1	1159	CUG	5UTR
Solyc01g028930.3.1	114	AUC	5UTR	AT1G07510.1	1255	AUG	Annotated TIS
Solyc01g028930.3.1	159	AUC	5UTR	AT1G07510.1	1218	AUG	5UTR
Solyc01g028930.3.1	97	AUC	5UTR	AT1G07530.1	204	AUA	5UTR
Solyc01g034020.3.1	195	AUG	Annotated TIS	AT1G07530.1	270	AUG	Annotated TIS
Solyc01g034020.3.1	70	AUG	5UTR	AT1G07530.1	228	AUU	5UTR
Solyc01g044270.3.1	115	AUG	5UTR	AT1G07615.1	183	AUG	CDS
Solyc01g044270.3.1	156	AUG	5UTR	AT1G07630.1	187	AUG	5UTR
Solyc01g044360.3.1	42	AUG	Annotated TIS	AT1G07660.1	68	AUA	5UTR
Solyc01g049650.3.1	115	AUG	CDS	AT1G07660.1	92	AAG	5UTR
Solyc01g056340.3.1	223	AUG	5UTR	AT1G07700.3	81	ACG	5UTR
Solyc01g056520.3.1	177	AUG	5UTR	AT1G07705.2	296	AUG	Annotated TIS
Solyc01g056520.3.1	123	UUG	5UTR	AT1G07705.2	259	AUG	5UTR
Solyc01g056570.3.1	255	AUG	5UTR	AT1G07745.1	101	AUG	Annotated TIS
Solyc01g056570.3.1	107	AUG	5UTR	AT1G07750.1	187	AUG	Annotated TIS
Solyc01g056780.3.1	166	AUG	Annotated TIS	AT1G07770.1	210	UUG	5UTR
Solyc01g056940.3.1	133	AUG	Annotated TIS	AT1G07770.1	259	AUG	Annotated TIS
Solyc01g057020.3.1	190	AUG	5UTR	AT1G07780.1	137	AUU	5UTR
Solyc01g057200.3.1	434	AUG	CDS	AT1G07790.1	112	AUG	Annotated TIS
Solyc01g057210.3.1	363	AUG	Annotated TIS	AT1G07810.1	162	UUG	5UTR
Solyc01g057210.3.1	207	AUG	5UTR	AT1G07820.1	167	AUC	5UTR
Solyc01g057340.3.1	349	AUG	5UTR	AT1G07820.1	212	UUG	5UTR
Solyc01g057460.3.1	533	AUG	5UTR	AT1G07820.1	137	UUG	5UTR
Solyc01g057520.3.1	160	AUG	CDS	AT1G07820.1	271	CUG	5UTR
Solyc01g057570.3.1	836	AUG	Annotated TIS	AT1G07830.1	268	AUG	Annotated TIS
Solyc01g057760.3.1	140	AUG	Annotated TIS	AT1G07890.1	225	GUG	5UTR
Solyc01g057780.3.1	169	AUG	Annotated TIS	AT1G07890.1	288	AUG	Annotated TIS
Solyc01g057780.3.1	78	AUG	5UTR	AT1G07920.1	189	AUG	Annotated TIS
Solyc01g057830.3.1	52	AUG	Annotated TIS	AT1G07930.1	129	AUC	5UTR
Solyc01g057900.3.1	143	AUG	Annotated TIS	AT1G07940.1	159	AUG	Annotated TIS
Solyc01g058010.3.1	109	AUG	Annotated TIS	AT1G07960.1	4	CUU	5UTR
Solyc01g058010.3.1	33	AUG	5UTR	AT1G07970.1	289	AUG	Annotated TIS
Solyc01g058140.3.1	184	AUG	Annotated TIS	AT1G07980.1	262	AUG	CDS
Solyc01g058260.3.1	378	AUG	CDS	AT1G07990.1	421	ACG	5UTR
Solyc01g058320.3.1	2603	AUG	Annotated TIS	AT1G07990.1	323	CUG	5UTR
Solyc01g058450.3.1	250	AUG	Annotated TIS	AT1G08010.1	176	ACG	5UTR
Solyc01g058670.3.1	307	GUG	5UTR	AT1G08010.1	242	AUG	Annotated TIS
Solyc01g058670.3.1	357	AUG	Annotated TIS	AT1G08030.1	137	CUG	5UTR
Solyc01g058670.3.1	250	AUU	5UTR	AT1G08040.1	219	CUG	5UTR
Solyc01g058720.3.1	689	AUG	Annotated TIS	AT1G08060.3	43	AUC	5UTR
Solyc01g058720.3.1	650	AUU	5UTR	AT1G08110.4	251	AUG	CDS
Solyc01g058720.3.1	606	AUA	5UTR	AT1G08125.2	105	AUG	5UTR
Solyc01g058735.1.1	187	AUG	5UTR	AT1G08130.1	132	AUG	Annotated TIS
Solyc01g059830.3.1	111	AUG	5UTR	AT1G08200.1	197	GUG	5UTR
Solyc01g059830.3.1	250	AUG	Annotated TIS	AT1G08200.1	236	AUG	Annotated TIS
Solyc01g059830.3.1	157	AUG	5UTR	AT1G08200.1	572	AUC	CDS
Solyc01g059860.3.1	436	AUG	Annotated TIS	AT1G08220.1	103	AUG	Annotated TIS
Solyc01g059860.3.1	342	AUG	5UTR	AT1G08290.1	198	AUG	Annotated TIS
Solyc01g059870.4.1	227	AUG	Annotated TIS	AT1G08290.1	251	AUG	CDS
Solyc01g059930.3.1	200	AUC	5UTR	AT1G08315.1	69	AUG	Annotated TIS
Solyc01g059930.3.1	272	UUG	5UTR	AT1G08315.1	19	AUA	5UTR
Solyc01g060030.3.1	363	AUG	Annotated TIS	AT1G08380.1	196	AUG	Annotated TIS
Solyc01g060030.3.1	299	AUG	5UTR	AT1G08420.1	398	AUG	5UTR
Solyc01g060080.3.1	178	AUG	Annotated TIS	AT1G08430.1	101	AUG	5UTR
Solyc01g060130.3.1	78	GUG	5UTR	AT1G08450.1	158	AUG	Annotated TIS
Solyc01g060170.3.1	221	AUG	5UTR	AT1G08490.1	112	AUG	Annotated TIS
Solyc01g060170.3.1	47	AUG	5UTR	AT1G08540.1	124	AUG	5UTR
Solyc01g060170.3.1	187	AUG	5UTR	AT1G08560.1	159	UUG	5UTR
Solyc01g060170.3.1	374	AUG	Annotated TIS	AT1G08570.1	430	AUG	CDS
Solyc01g060240.3.1	274	AUG	5UTR	AT1G08580.1	242	GCC	CDS
Solyc01g060470.3.1	265	AUG	Annotated TIS	AT1G08650.1	83	AUG	Annotated TIS
Solyc01g065510.2.1	91	AUU	5UTR	AT1G08660.1	202	AUG	5UTR
Solyc01g065510.2.1	149	AUG	Annotated TIS	AT1G08680.4	118	AGC	5UTR
Solyc01g065530.3.1	340	AUG	Annotated TIS	AT1G08720.1	149	AUG	Annotated TIS
Solyc01g065550.3.1	486	AUG	Annotated TIS	AT1G08820.1	298	AUG	Annotated TIS
Solyc01g065580.3.1	149	AUG	Annotated TIS	AT1G08880.1	354	AUA	5UTR
Solyc01g065690.3.1	520	AUG	Annotated TIS	AT1G08970.1	151	AUC	5UTR
Solyc01g065700.3.1	129	AUG	5UTR	AT1G08970.1	194	AUG	Annotated TIS
Solyc01g065710.3.1	554	AUG	Annotated TIS	AT1G08980.1	105	AUG	Annotated TIS
Solyc01g065720.3.1	209	AUG	5UTR	AT1G09020.1	104	AUG	5UTR
Solyc01g065720.3.1	335	AUG	Annotated TIS	AT1G09060.3	88	AUG	CDS
Solyc01g066050.3.1	365	AUG	Annotated TIS	AT1G09070.1	266	AUG	Annotated TIS
Solyc01g066050.3.1	315	AUA	5UTR	AT1G09130.3	72	AUG	Annotated TIS
Solyc01g066050.3.1	195	AUU	5UTR	AT1G09150.1	420	UUU	CDS
Solyc01g066290.2.1	79	AUG	CDS	AT1G09200.1	203	AUG	Annotated TIS
Solyc01g066430.3.1	1	AUG	Annotated TIS	AT1G09210.1	348	AUG	Annotated TIS
Solyc01g066480.3.1	78	AUA	5UTR	AT1G09270.1	128	GUG	5UTR
Solyc01g066480.3.1	139	CUG	5UTR	AT1G09270.1	176	AUG	Annotated TIS
Solyc01g066520.3.1	194	AUG	Annotated TIS	AT1G09280.1	110	AUG	Annotated TIS
Solyc01g066590.3.1	72	AUU	5UTR	AT1G09330.1	281	GUG	5UTR
Solyc01g066590.3.1	184	CUG	5UTR	AT1G09330.1	353	AUG	Annotated TIS
Solyc01g066590.3.1	243	AUG	Annotated TIS	AT1G09520.1	45	AUG	Annotated TIS
Solyc01g066680.3.1	54	AUG	Annotated TIS	AT1G09580.1	166	AUG	Annotated TIS
Solyc01g066720.3.1	110	AUG	Annotated TIS	AT1G09580.1	109	CUG	5UTR
Solyc01g066840.3.1	117	AUG	5UTR	AT1G09590.1	291	GGC	CDS
Solyc01g066840.3.1	184	UUG	5UTR	AT1G09590.1	252	UAC	CDS
Solyc01g066840.3.1	226	AUG	Annotated TIS	AT1G09620.1	146	AUG	Annotated TIS
Solyc01g066840.3.1	155	UUG	5UTR	AT1G09640.1	268	CUG	5UTR
Solyc01g066860.3.1	66	AUG	Annotated TIS	AT1G09640.1	316	AUG	Annotated TIS
Solyc01g066870.3.1	295	AUG	CDS	AT1G09645.1	230	AUG	Annotated TIS
Solyc01g066870.3.1	225	AUG	Annotated TIS	AT1G09660.1	124	GUG	5UTR
Solyc01g066880.3.1	65	AUG	Annotated TIS	AT1G09730.1	145	AUG	Annotated TIS
Solyc01g066880.3.1	130	AUG	CDS	AT1G09760.1	90	AUG	Annotated TIS
Solyc01g066900.3.1	285	AUU	5UTR	AT1G09770.1	114	AUU	5UTR
Solyc01g067000.3.1	1	AUG	Annotated TIS	AT1G09780.1	113	AUG	Annotated TIS
Solyc01g067010.3.1	100	AUG	CDS	AT1G09800.1	67	AUG	5UTR
Solyc01g067010.3.1	204	AUG	CDS	AT1G09840.1	327	ACA	5UTR
Solyc01g067010.3.1	142	AUU	CDS	AT1G09910.1	134	AUG	CDS
Solyc01g067010.3.1	43	AUC	CDS	AT1G09920.1	98	ACG	5UTR
Solyc01g067080.3.1	151	AUG	5UTR	AT1G09970.2	35	GUG	5UTR
Solyc01g067090.3.1	45	AUG	5UTR	AT1G09970.2	92	AUG	Annotated TIS
Solyc01g067120.3.1	178	UUG	CDS	AT1G10020.1	168	AUG	5UTR
Solyc01g067125.1.1	1	AUG	Annotated TIS	AT1G10030.1	163	AUG	5UTR
Solyc01g067125.1.1	22	UUG	CDS	AT1G10090.1	181	UUG	5UTR
Solyc01g067280.3.1	40	AUG	Annotated TIS	AT1G10140.1	260	AGG	5UTR
Solyc01g067290.2.1	272	AUG	CDS	AT1G10170.4	208	AUG	Annotated TIS
Solyc01g067290.2.1	178	AUG	Annotated TIS	AT1G10170.4	148	AUU	5UTR
Solyc01g067295.1.1	56	AUG	Annotated TIS	AT1G10170.4	46	CUG	5UTR
Solyc01g067360.3.1	187	AUG	Annotated TIS	AT1G10170.4	101	AUU	5UTR
Solyc01g067460.2.1	1	AUG	Annotated TIS	AT1G10170.4	130	AUU	5UTR
Solyc01g067500.3.1	416	AUG	Annotated TIS	AT1G10200.1	361	CUG	5UTR
Solyc01g067510.3.1	130	AUG	5UTR	AT1G10280.1	62	AUG	5UTR
Solyc01g067530.3.1	79	AUG	5UTR	AT1G10290.1	373	AUG	Annotated TIS
Solyc01g067560.3.1	170	AUG	CDS	AT1G10300.1	340	GUG	CDS
Solyc01g067560.3.1	232	AUG	CDS	AT1G10310.1	130	AUG	Annotated TIS
Solyc01g067590.3.1	2578	AUG	Annotated TIS	AT1G10390.1	395	AUA	5UTR
Solyc01g067600.3.1	256	AUG	5UTR	AT1G10390.1	120	AUU	5UTR
Solyc01g067630.3.1	127	AUG	Annotated TIS	AT1G10390.1	441	AUG	Annotated TIS
Solyc01g067660.3.1	227	CUG	5UTR	AT1G10390.1	70	AUC	5UTR
Solyc01g067680.3.1	180	AUG	5UTR	AT1G10430.1	91	UUG	5UTR
Solyc01g067680.3.1	119	AUG	5UTR	AT1G10430.1	64	AUC	5UTR
Solyc01g067680.3.1	77	CUG	5UTR	AT1G10470.1	602	AUG	Annotated TIS
Solyc01g067710.3.1	19	AUG	5UTR	AT1G10470.1	473	AUC	5UTR
Solyc01g067720.3.1	226	CUG	5UTR	AT1G10500.1	146	AUG	Annotated TIS
Solyc01g067720.3.1	277	AUG	Annotated TIS	AT1G10522.1	203	ACC	5UTR
Solyc01g067730.3.1	171	AUG	Annotated TIS	AT1G10590.3	101	AUG	CDS
Solyc01g067740.3.1	294	UUG	5UTR	AT1G10600.1	76	AUG	5UTR
Solyc01g067740.3.1	345	AUG	Annotated TIS	AT1G10630.1	177	AGG	5UTR
Solyc01g067830.3.1	353	AUG	Annotated TIS	AT1G10630.1	199	AUG	Annotated TIS
Solyc01g067890.3.1	291	AUG	Annotated TIS	AT1G10670.3	210	AUG	Annotated TIS
Solyc01g067890.3.1	187	AUU	5UTR	AT1G10690.1	184	UUG	5UTR
Solyc01g067900.3.1	1	AUG	Annotated TIS	AT1G10690.1	228	CUG	5UTR
Solyc01g067930.3.1	1	AUG	Annotated TIS	AT1G10730.1	121	AUC	5UTR
Solyc01g068000.3.1	173	UUG	5UTR	AT1G10730.1	83	AUG	5UTR
Solyc01g068000.3.1	224	ACG	5UTR	AT1G10740.1	316	AUG	5UTR
Solyc01g068000.3.1	192	AUC	5UTR	AT1G10740.1	427	AUG	5UTR
Solyc01g068030.3.1	494	AUG	Annotated TIS	AT1G10780.2	143	AUG	CDS
Solyc01g068065.1.1	172	AUG	CDS	AT1G10820.2	304	AUG	Annotated TIS
Solyc01g068100.3.1	308	AUG	5UTR	AT1G10840.1	318	AUG	Annotated TIS
Solyc01g068100.3.1	275	AUG	5UTR	AT1G10840.1	144	AUU	5UTR
Solyc01g068100.3.1	365	AUG	5UTR	AT1G10840.1	194	AUA	5UTR
Solyc01g068130.3.1	219	AUG	Annotated TIS	AT1G10865.1	226	AUG	Annotated TIS
Solyc01g068190.3.1	72	AUG	Annotated TIS	AT1G10940.2	261	AUC	5UTR
Solyc01g068210.3.1	103	AUA	5UTR	AT1G10940.2	147	UUG	5UTR
Solyc01g068210.3.1	368	AUG	5UTR	AT1G10990.2	72	CUG	5UTR
Solyc01g068210.3.1	233	AUG	5UTR	AT1G11020.1	175	AUG	5UTR
Solyc01g068210.3.1	170	UUG	5UTR	AT1G11070.4	499	AUG	5UTR
Solyc01g068250.2.1	70	AUG	Annotated TIS	AT1G11070.4	550	AUG	Annotated TIS
Solyc01g068270.3.1	99	AUG	5UTR	AT1G11130.1	428	AUG	Annotated TIS
Solyc01g068400.3.1	186	AUG	Annotated TIS	AT1G11200.1	236	AUG	Annotated TIS
Solyc01g068460.3.1	45	AUG	Annotated TIS	AT1G11360.1	190	AUG	Annotated TIS
Solyc01g068475.1.1	43	AUG	CDS	AT1G11390.1	280	AUG	5UTR
Solyc01g068480.3.1	287	AUA	5UTR	AT1G11475.1	122	AUG	Annotated TIS
Solyc01g068530.3.1	1	AUG	Annotated TIS	AT1G11475.1	68	AUU	5UTR
Solyc01g068560.3.1	81	AUG	5UTR	AT1G11480.1	148	GUG	5UTR
Solyc01g068560.3.1	201	AUG	5UTR	AT1G11480.1	98	CUG	5UTR
Solyc01g068560.3.1	294	AUG	5UTR	AT1G11480.1	197	AUC	5UTR
Solyc01g073640.3.1	138	AUG	Annotated TIS	AT1G11650.2	122	AUG	Annotated TIS
Solyc01g073650.3.1	2385	AUG	3UTR	AT1G11660.1	131	AUU	5UTR
Solyc01g073650.3.1	163	AUA	5UTR	AT1G11680.1	281	AUU	CDS
Solyc01g073650.3.1	297	AUG	Annotated TIS	AT1G11680.1	234	AUC	5UTR
Solyc01g073680.3.1	107	AUG	Annotated TIS	AT1G11680.1	164	GUG	5UTR
Solyc01g073690.2.1	18	AUG	Annotated TIS	AT1G11760.1	22	GUG	5UTR
Solyc01g073720.2.1	88	AUG	Annotated TIS	AT1G11770.1	434	CUG	CDS
Solyc01g073720.2.1	45	AUU	5UTR	AT1G11800.1	73	AUG	CDS
Solyc01g073730.3.1	258	AUG	CDS	AT1G11840.6	219	AUG	CDS
Solyc01g073740.3.1	193	AUG	Annotated TIS	AT1G11840.6	41	GUG	5UTR
Solyc01g073770.2.1	31	AUG	5UTR	AT1G11860.3	116	AUG	5UTR
Solyc01g073870.3.1	435	AUG	Annotated TIS	AT1G11870.2	139	AUG	Annotated TIS
Solyc01g073900.3.1	117	AUG	5UTR	AT1G11880.1	117	AUG	Annotated TIS
Solyc01g073960.3.1	301	AUG	Annotated TIS	AT1G11890.1	116	AUU	5UTR
Solyc01g073970.3.1	51	AUG	Annotated TIS	AT1G11905.1	177	AUG	Annotated TIS
Solyc01g079110.3.1	1	AUG	Annotated TIS	AT1G11910.2	803	AUG	CDS
Solyc01g079150.3.1	328	AUG	Annotated TIS	AT1G11930.1	84	AUU	5UTR
Solyc01g079150.3.1	200	AUG	5UTR	AT1G11940.1	73	AUG	5UTR
Solyc01g079210.3.1	63	AUG	5UTR	AT1G12000.1	97	ACG	5UTR
Solyc01g079220.3.1	1	AUG	Annotated TIS	AT1G12000.1	145	AUG	Annotated TIS
Solyc01g079240.3.1	284	AUG	CDS	AT1G12020.1	245	AUG	Annotated TIS
Solyc01g079240.3.1	232	AUG	Annotated TIS	AT1G12050.1	164	AUG	Annotated TIS
Solyc01g079250.3.1	110	AUG	Annotated TIS	AT1G12120.1	97	AUG	5UTR
Solyc01g079260.3.1	165	AUG	Annotated TIS	AT1G12120.1	201	AUG	5UTR
Solyc01g079330.3.1	182	AUG	5UTR	AT1G12140.1	102	AUG	Annotated TIS
Solyc01g079330.3.1	326	AUG	Annotated TIS	AT1G12200.1	117	AUG	Annotated TIS
Solyc01g079360.3.1	171	AUG	Annotated TIS	AT1G12230.2	89	AUG	Annotated TIS
Solyc01g079410.3.1	5	AUG	Annotated TIS	AT1G12240.1	324	GUG	CDS
Solyc01g079420.3.1	124	AUG	Annotated TIS	AT1G12250.1	61	AUG	Annotated TIS
Solyc01g079450.3.1	340	AUG	5UTR	AT1G12260.1	384	AUG	5UTR
Solyc01g079450.3.1	576	AUG	CDS	AT1G12270.1	71	AUG	Annotated TIS
Solyc01g079470.3.1	1	AUG	Annotated TIS	AT1G12310.1	245	AUC	5UTR
Solyc01g079507.1.1	1	AUG	Annotated TIS	AT1G12350.1	238	UUC	CDS
Solyc01g079510.3.1	128	AUG	5UTR	AT1G12400.3	194	AUG	5UTR
Solyc01g079530.3.1	35	AUU	5UTR	AT1G12410.1	70	AUG	Annotated TIS
Solyc01g079540.3.1	95	AUG	Annotated TIS	AT1G12420.1	163	ACG	5UTR
Solyc01g079580.3.1	113	AUG	Annotated TIS	AT1G12420.1	210	AUG	5UTR
Solyc01g079580.3.1	137	AUG	CDS	AT1G12420.1	108	AUU	5UTR
Solyc01g079580.3.1	64	AUG	5UTR	AT1G12440.1	432	AUG	Annotated TIS
Solyc01g079610.3.1	155	AUC	5UTR	AT1G12640.1	202	GUG	5UTR
Solyc01g079610.3.1	220	AUG	Annotated TIS	AT1G12640.1	242	AUG	Annotated TIS
Solyc01g079610.3.1	177	UUG	5UTR	AT1G12650.1	189	AUG	CDS
Solyc01g079610.3.1	118	UUG	5UTR	AT1G12680.1	656	AUG	CDS
Solyc01g079660.2.1	135	AUG	Annotated TIS	AT1G12680.1	339	AUG	5UTR
Solyc01g079660.2.1	65	GUG	5UTR	AT1G12710.2	110	ACG	5UTR
Solyc01g079680.3.1	191	AUG	Annotated TIS	AT1G12740.2	181	AUG	Annotated TIS
Solyc01g079740.3.1	94	AUG	Annotated TIS	AT1G12770.1	238	GAG	5UTR
Solyc01g079750.3.1	148	AUG	5UTR	AT1G12800.1	180	AUG	5UTR
Solyc01g079760.3.1	232	AUG	Annotated TIS	AT1G12805.1	152	AUG	Annotated TIS
Solyc01g079780.3.1	1632	AUG	Annotated TIS	AT1G12805.1	61	AUG	5UTR
Solyc01g079800.3.1	164	AUG	Annotated TIS	AT1G12810.2	77	AUG	Annotated TIS
Solyc01g079810.3.1	588	AUG	5UTR	AT1G12830.1	195	AUG	Annotated TIS
Solyc01g079820.3.1	125	GUA	CDS	AT1G12840.1	1436	AUG	CDS
Solyc01g079820.3.1	56	AUG	Annotated TIS	AT1G12840.1	1380	AUG	Annotated TIS
Solyc01g079830.3.1	76	AUG	CDS	AT1G12910.1	138	AUG	Annotated TIS
Solyc01g079840.3.1	190	AUG	Annotated TIS	AT1G12920.1	145	AUG	Annotated TIS
Solyc01g079860.3.1	211	AUG	Annotated TIS	AT1G12980.1	74	AUG	Annotated TIS
Solyc01g079860.3.1	112	CUG	5UTR	AT1G13020.1	345	UUG	5UTR
Solyc01g079870.3.1	242	AUG	Annotated TIS	AT1G13020.1	396	CUG	5UTR
Solyc01g079870.3.1	137	AUC	5UTR	AT1G13060.2	171	AUG	Annotated TIS
Solyc01g079870.3.1	191	GUG	5UTR	AT1G13060.2	139	UUG	5UTR
Solyc01g079940.3.1	51	AUG	Annotated TIS	AT1G13120.1	185	AUA	5UTR
Solyc01g080020.2.1	127	AUG	Annotated TIS	AT1G13170.2	253	AUG	5UTR
Solyc01g080130.2.1	395	AUG	Annotated TIS	AT1G13190.1	316	AUG	Annotated TIS
Solyc01g080130.2.1	21	AUG	5UTR	AT1G13190.1	272	ACG	5UTR
Solyc01g080130.2.1	144	UUG	5UTR	AT1G13220.3	197	AUG	Annotated TIS
Solyc01g080140.3.1	141	AUG	5UTR	AT1G13250.1	221	AUG	Annotated TIS
Solyc01g080160.3.1	83	AUG	Annotated TIS	AT1G13260.1	219	AUG	Annotated TIS
Solyc01g080170.3.1	1	AUG	Annotated TIS	AT1G13270.1	239	AUC	CDS
Solyc01g080220.3.1	417	AUG	Annotated TIS	AT1G13300.1	100	AUG	Annotated TIS
Solyc01g080240.3.1	328	AUG	5UTR	AT1G13300.1	121	AUG	CDS
Solyc01g080240.3.1	712	AUG	5UTR	AT1G13330.1	74	AUG	Annotated TIS
Solyc01g080240.3.1	279	UUG	5UTR	AT1G13360.1	512	AUA	5UTR
Solyc01g080240.3.1	629	UUG	5UTR	AT1G13360.1	557	AUG	Annotated TIS
Solyc01g080240.3.1	385	GUG	5UTR	AT1G13370.1	140	AUG	Annotated TIS
Solyc01g080250.3.1	148	AUU	5UTR	AT1G13390.1	903	AUG	Annotated TIS
Solyc01g080260.3.1	467	AUG	Annotated TIS	AT1G13440.1	385	AUG	Annotated TIS
Solyc01g080270.3.1	363	AUG	Annotated TIS	AT1G13770.1	147	AGA	CDS
Solyc01g080280.3.1	225	AUG	Annotated TIS	AT1G13810.1	98	AUG	Annotated TIS
Solyc01g080280.3.1	183	AUU	5UTR	AT1G13860.1	127	CUG	5UTR
Solyc01g080300.3.1	112	AUG	Annotated TIS	AT1G13870.1	92	AUG	Annotated TIS
Solyc01g080340.3.1	211	AUG	CDS	AT1G13980.1	142	AUG	5UTR
Solyc01g080360.3.1	83	AUG	5UTR	AT1G14000.1	249	AUG	Annotated TIS
Solyc01g080415.1.1	70	AUG	Annotated TIS	AT1G14010.1	61	AUG	Annotated TIS
Solyc01g080430.3.1	152	AUG	Annotated TIS	AT1G14060.1	168	CUG	5UTR
Solyc01g080430.3.1	88	AUG	5UTR	AT1G14060.1	220	AUG	Annotated TIS
Solyc01g080460.3.1	172	AUG	5UTR	AT1G14230.1	289	AUG	5UTR
Solyc01g080460.3.1	245	AUG	Annotated TIS	AT1G14290.1	407	AUG	5UTR
Solyc01g080490.2.1	133	AUG	Annotated TIS	AT1G14290.1	482	AUG	Annotated TIS
Solyc01g080500.2.1	167	UUG	5UTR	AT1G14300.2	60	ACG	5UTR
Solyc01g080500.2.1	215	GUG	5UTR	AT1G14320.1	310	UUG	CDS
Solyc01g080500.2.1	257	AUG	Annotated TIS	AT1G14330.1	115	CUG	5UTR
Solyc01g080500.2.1	85	UUG	5UTR	AT1G14345.1	132	AUG	Annotated TIS
Solyc01g080500.2.1	126	UUG	5UTR	AT1G14360.1	80	AUU	5UTR
Solyc01g080510.3.1	198	AUG	Annotated TIS	AT1G14400.1	301	AUG	5UTR
Solyc01g080540.3.1	276	AUG	Annotated TIS	AT1G14400.1	245	CUG	5UTR
Solyc01g080590.3.1	238	AUG	Annotated TIS	AT1G14450.2	113	AUG	CDS
Solyc01g080600.3.1	1	AUG	Annotated TIS	AT1G14510.1	315	CUG	5UTR
Solyc01g080620.3.1	181	AUG	Annotated TIS	AT1G14510.1	362	AUG	Annotated TIS
Solyc01g080640.3.1	48	AUG	5UTR	AT1G14510.1	171	AUG	5UTR
Solyc01g080640.3.1	158	AUG	Annotated TIS	AT1G14560.1	422	AUG	5UTR
Solyc01g080670.3.1	376	AUG	Annotated TIS	AT1G14610.1	135	ACG	CDS
Solyc01g080670.3.1	439	AUG	CDS	AT1G14610.1	180	AUG	CDS
Solyc01g080760.3.1	201	AUG	Annotated TIS	AT1G14620.1	208	AUG	Annotated TIS
Solyc01g080810.3.1	283	AUG	5UTR	AT1G14630.1	200	GUG	CDS
Solyc01g080840.3.1	78	AUG	Annotated TIS	AT1G14650.1	506	AUG	Annotated TIS
Solyc01g080850.3.1	74	CUG	5UTR	AT1G14688.1	41	AUG	CDS
Solyc01g080870.3.1	155	AUG	CDS	AT1G14710.1	351	AUG	5UTR
Solyc01g080870.3.1	135	AUG	CDS	AT1G14710.1	312	CUG	5UTR
Solyc01g080880.3.1	195	AUG	5UTR	AT1G14720.1	212	AUG	Annotated TIS
Solyc01g080890.2.1	62	AUG	Annotated TIS	AT1G14740.1	250	AUG	Annotated TIS
Solyc01g080930.3.1	62	AUG	Annotated TIS	AT1G14810.1	218	AUG	Annotated TIS
Solyc01g081010.3.1	136	AUG	Annotated TIS	AT1G14830.1	177	ACG	5UTR
Solyc01g081010.3.1	91	AUC	5UTR	AT1G14830.1	228	CUG	5UTR
Solyc01g081030.3.1	71	AUG	5UTR	AT1G14830.1	277	AUG	Annotated TIS
Solyc01g081070.3.1	167	AUG	Annotated TIS	AT1G14830.1	146	CUG	5UTR
Solyc01g081150.3.1	246	AUG	Annotated TIS	AT1G14850.1	130	UUG	5UTR
Solyc01g081150.3.1	197	CUG	5UTR	AT1G14900.1	115	AUG	Annotated TIS
Solyc01g081200.3.1	82	AUG	Annotated TIS	AT1G14910.1	165	AUG	Annotated TIS
Solyc01g081297.1.1	171	AUG	5UTR	AT1G14980.1	286	AUG	Annotated TIS
Solyc01g081300.3.1	2	AUG	5UTR	AT1G14990.2	27	AUG	5UTR
Solyc01g081310.3.1	440	AUG	CDS	AT1G15030.1	61	AUG	5UTR
Solyc01g081390.3.1	1	AUG	Annotated TIS	AT1G15085.1	42	GGA	CDS
Solyc01g081400.3.1	95	AUG	Annotated TIS	AT1G15110.2	160	AUC	5UTR
Solyc01g081440.3.1	93	AUG	5UTR	AT1G15110.2	276	AUG	Annotated TIS
Solyc01g081450.3.1	158	AUU	5UTR	AT1G15130.1	78	AUC	5UTR
Solyc01g081450.3.1	135	AUU	5UTR	AT1G15130.1	132	AUG	Annotated TIS
Solyc01g081450.3.1	177	AUG	Annotated TIS	AT1G15180.1	159	AUG	Annotated TIS
Solyc01g081470.3.1	2609	AUG	Annotated TIS	AT1G15200.3	168	AUG	Annotated TIS
Solyc01g081490.3.1	196	AUG	5UTR	AT1G15215.4	53	AUG	Annotated TIS
Solyc01g081490.3.1	152	CUG	5UTR	AT1G15220.1	422	AUG	Annotated TIS
Solyc01g081490.3.1	312	AUG	Annotated TIS	AT1G15230.1	217	UCG	CDS
Solyc01g081520.3.1	166	UUG	5UTR	AT1G15230.1	67	AUG	Annotated TIS
Solyc01g081520.3.1	216	AUG	Annotated TIS	AT1G15250.1	155	CUG	5UTR
Solyc01g081570.3.1	334	AUG	Annotated TIS	AT1G15250.1	242	ACG	CDS
Solyc01g081570.3.1	221	AUA	5UTR	AT1G15250.1	194	AUG	Annotated TIS
Solyc01g081570.3.1	271	AUG	5UTR	AT1G15250.1	275	CAC	CDS
Solyc01g086640.2.1	164	AUG	5UTR	AT1G15270.1	102	AUG	Annotated TIS
Solyc01g086660.2.1	34	AUG	5UTR	AT1G15280.2	127	AUG	Annotated TIS
Solyc01g086670.3.1	19	AUA	5UTR	AT1G15340.1	396	AUG	Annotated TIS
Solyc01g086670.3.1	89	AUG	Annotated TIS	AT1G15340.1	274	ACG	5UTR
Solyc01g086740.3.1	1	AUG	Annotated TIS	AT1G15340.1	330	AUA	5UTR
Solyc01g086800.3.1	1	AUG	Annotated TIS	AT1G15340.1	292	AUU	5UTR
Solyc01g086820.3.1	1	AUG	Annotated TIS	AT1G15350.1	432	AUG	CDS
Solyc01g086850.3.1	1360	AUG	Annotated TIS	AT1G15350.1	120	AUG	5UTR
Solyc01g086850.3.1	1274	AUG	5UTR	AT1G15370.1	270	AUG	Annotated TIS
Solyc01g086860.3.1	180	AUG	Annotated TIS	AT1G15390.1	55	AUG	CDS
Solyc01g086870.3.1	91	AUA	5UTR	AT1G15400.3	1	AUG	Annotated TIS
Solyc01g086870.3.1	67	AUU	5UTR	AT1G15420.1	227	AUG	Annotated TIS
Solyc01g086870.3.1	111	AUG	Annotated TIS	AT1G15430.1	329	AUU	5UTR
Solyc01g086870.3.1	141	AUG	CDS	AT1G15440.1	46	AUU	5UTR
Solyc01g086920.3.1	1	AUG	Annotated TIS	AT1G15440.1	99	AUG	Annotated TIS
Solyc01g086950.3.1	86	AUG	5UTR	AT1G15470.1	48	AUA	5UTR
Solyc01g086950.3.1	131	AUG	5UTR	AT1G15470.1	195	UUG	5UTR
Solyc01g086950.3.1	247	AUG	5UTR	AT1G15480.1	163	AUG	Annotated TIS
Solyc01g086950.3.1	66	AUG	5UTR	AT1G15500.1	91	UUG	5UTR
Solyc01g086960.3.1	1	AUG	Annotated TIS	AT1G15500.1	137	AUG	Annotated TIS
Solyc01g086970.3.1	82	AUG	CDS	AT1G15570.1	284	AUG	5UTR
Solyc01g086970.3.1	40	AUC	CDS	AT1G15580.1	38	AUG	Annotated TIS
Solyc01g086980.3.1	221	AUG	5UTR	AT1G15690.1	602	CUG	CDS
Solyc01g086990.3.1	241	AUG	Annotated TIS	AT1G15700.1	27	AAA	5UTR
Solyc01g086990.3.1	196	CUG	5UTR	AT1G15710.1	376	AUG	Annotated TIS
Solyc01g087020.2.1	239	AUG	Annotated TIS	AT1G15720.1	61	ACG	5UTR
Solyc01g087040.2.1	31	AUG	Annotated TIS	AT1G15730.1	107	AUG	Annotated TIS
Solyc01g087090.3.1	117	AUC	CDS	AT1G15740.1	83	CUG	5UTR
Solyc01g087120.3.1	127	AUG	Annotated TIS	AT1G15740.1	139	AUG	5UTR
Solyc01g087170.3.1	16	AUG	5UTR	AT1G15740.1	36	AUC	5UTR
Solyc01g087170.3.1	94	AUG	5UTR	AT1G15740.1	283	UUA	CDS
Solyc01g087190.3.1	385	AUG	Annotated TIS	AT1G15750.1	290	AUG	5UTR
Solyc01g087210.3.1	139	AUG	5UTR	AT1G15750.1	395	AUG	Annotated TIS
Solyc01g087250.3.1	84	AUG	5UTR	AT1G15772.1	73	ACG	5UTR
Solyc01g087270.3.1	181	AUG	Annotated TIS	AT1G15772.1	180	AUG	Annotated TIS
Solyc01g087290.3.1	321	AUG	CDS	AT1G15780.2	219	UUG	5UTR
Solyc01g087290.3.1	182	AUG	5UTR	AT1G15780.2	274	AUG	Annotated TIS
Solyc01g087300.3.1	427	AUG	5UTR	AT1G15780.2	356	CUG	CDS
Solyc01g087300.3.1	492	AUG	Annotated TIS	AT1G15780.2	113	AUA	5UTR
Solyc01g087300.3.1	360	CUG	5UTR	AT1G15790.3	97	AUC	5UTR
Solyc01g087520.3.1	158	AUG	CDS	AT1G15790.3	60	AUA	5UTR
Solyc01g087520.3.1	1	AUG	Annotated TIS	AT1G15790.3	114	UUG	5UTR
Solyc01g087540.3.1	123	AUG	CDS	AT1G15790.3	141	AUG	Annotated TIS
Solyc01g087550.3.1	289	AUG	Annotated TIS	AT1G15800.1	328	AUG	Annotated TIS
Solyc01g087570.2.1	31	AUG	5UTR	AT1G15810.1	277	AUG	Annotated TIS
Solyc01g087580.3.1	31	AUG	CDS	AT1G15820.1	205	AUG	Annotated TIS
Solyc01g087590.3.1	128	AUG	Annotated TIS	AT1G15860.3	1012	AUU	3UTR
Solyc01g087600.3.1	297	AUG	5UTR	AT1G15920.1	80	CUG	5UTR
Solyc01g087600.3.1	167	CUG	5UTR	AT1G15920.1	284	AAA	5UTR
Solyc01g087620.3.1	146	AUG	Annotated TIS	AT1G15920.1	393	AUC	5UTR
Solyc01g087640.3.1	160	AUG	Annotated TIS	AT1G15930.1	9	CUG	5UTR
Solyc01g087640.3.1	101	AUG	5UTR	AT1G15930.1	202	AUA	5UTR
Solyc01g087650.3.1	259	AUG	Annotated TIS	AT1G15940.1	258	AUG	5UTR
Solyc01g087680.3.1	77	AUG	Annotated TIS	AT1G15940.1	314	AUG	Annotated TIS
Solyc01g087730.3.1	72	AUG	Annotated TIS	AT1G15970.1	401	GUG	5UTR
Solyc01g087750.3.1	306	AUG	CDS	AT1G15970.1	260	UUG	5UTR
Solyc01g087850.2.1	562	AUG	Annotated TIS	AT1G15970.1	450	AUG	5UTR
Solyc01g087890.3.1	939	ACG	5UTR	AT1G16010.1	45	ACG	5UTR
Solyc01g087970.3.1	212	AUG	CDS	AT1G16010.1	171	AUG	5UTR
Solyc01g087970.3.1	139	AUG	Annotated TIS	AT1G16040.1	140	AUG	Annotated TIS
Solyc01g087980.3.1	124	AUG	CDS	AT1G16180.1	525	AUG	Annotated TIS
Solyc01g088030.3.1	1382	AUG	5UTR	AT1G16210.1	264	AUC	5UTR
Solyc01g088050.3.1	1	AUG	Annotated TIS	AT1G16240.1	160	AUG	5UTR
Solyc01g088060.3.1	276	AUG	5UTR	AT1G16240.1	112	GUG	5UTR
Solyc01g088080.3.1	131	AUC	5UTR	AT1G16320.1	83	AUG	5UTR
Solyc01g088080.3.1	181	AUG	Annotated TIS	AT1G16340.4	70	AUG	5UTR
Solyc01g088100.3.1	176	AUG	5UTR	AT1G16340.4	174	AUG	Annotated TIS
Solyc01g088100.3.1	273	CUG	5UTR	AT1G16350.1	196	AUG	Annotated TIS
Solyc01g088150.3.1	303	ACG	5UTR	AT1G16470.1	151	CUG	5UTR
Solyc01g088150.3.1	332	CUG	5UTR	AT1G16610.3	145	AUU	5UTR
Solyc01g088170.4.1	494	AUG	5UTR	AT1G16610.3	167	AUG	Annotated TIS
Solyc01g088370.3.1	141	AUG	Annotated TIS	AT1G16630.1	112	CUG	5UTR
Solyc01g088370.3.1	60	GUG	5UTR	AT1G16700.1	286	AUG	Annotated TIS
Solyc01g088440.2.1	51	AUG	Annotated TIS	AT1G16720.2	145	AUG	5UTR
Solyc01g088450.2.1	47	AUG	Annotated TIS	AT1G16760.2	5	AAA	5UTR
Solyc01g088460.3.1	131	AUG	Annotated TIS	AT1G16790.1	367	AAG	CDS
Solyc01g088480.3.1	1	AUG	Annotated TIS	AT1G16810.1	243	AUG	Annotated TIS
Solyc01g088550.3.1	1	AUG	Annotated TIS	AT1G16840.1	136	AUU	5UTR
Solyc01g088560.3.1	270	AUC	5UTR	AT1G16860.1	122	CUG	5UTR
Solyc01g088560.3.1	335	AUG	Annotated TIS	AT1G16870.1	166	AUG	Annotated TIS
Solyc01g088570.3.1	150	AUG	Annotated TIS	AT1G16890.3	59	ACG	5UTR
Solyc01g088610.3.1	60	AUG	Annotated TIS	AT1G16890.3	158	AUG	Annotated TIS
Solyc01g088610.3.1	172	AUG	CDS	AT1G17100.1	121	AUG	Annotated TIS
Solyc01g088610.3.1	28	CUG	5UTR	AT1G17280.4	400	AUG	Annotated TIS
Solyc01g088660.3.1	136	AUU	5UTR	AT1G17280.4	354	AUU	5UTR
Solyc01g088660.3.1	178	AUG	Annotated TIS	AT1G17290.1	440	AUG	Annotated TIS
Solyc01g088660.3.1	90	AUU	5UTR	AT1G17290.1	507	AUC	CDS
Solyc01g088690.3.1	303	AUG	5UTR	AT1G17370.1	267	CUG	5UTR
Solyc01g088700.3.1	233	AUA	5UTR	AT1G17455.1	146	AUG	5UTR
Solyc01g088700.3.1	37	AUG	5UTR	AT1G17460.2	95	AUG	5UTR
Solyc01g088700.3.1	169	AUG	5UTR	AT1G17490.1	233	AUG	Annotated TIS
Solyc01g088710.3.1	335	AUG	Annotated TIS	AT1G17510.1	99	AUG	Annotated TIS
Solyc01g088720.3.1	247	AUG	5UTR	AT1G17530.1	237	AUG	Annotated TIS
Solyc01g088740.3.1	103	AUG	5UTR	AT1G17560.1	125	AUG	Annotated TIS
Solyc01g088760.3.1	152	AUG	Annotated TIS	AT1G17690.1	147	UUG	5UTR
Solyc01g089880.3.1	25	AUG	CDS	AT1G17690.1	225	AUG	Annotated TIS
Solyc01g089907.1.1	72	AUG	Annotated TIS	AT1G17710.1	53	AUG	Annotated TIS
Solyc01g089970.3.1	83	AUG	Annotated TIS	AT1G17720.1	214	AUG	5UTR
Solyc01g089970.3.1	37	UUG	5UTR	AT1G17730.1	126	AUU	5UTR
Solyc01g089980.3.1	295	AUA	5UTR	AT1G17880.1	202	CAC	CDS
Solyc01g090190.3.1	180	AUG	5UTR	AT1G17880.1	250	AGA	CDS
Solyc01g090200.3.1	81	AUG	Annotated TIS	AT1G17880.1	118	AUG	Annotated TIS
Solyc01g090225.1.1	99	AUG	Annotated TIS	AT1G17890.1	141	CUG	5UTR
Solyc01g090290.3.1	183	AUC	5UTR	AT1G17980.1	82	AUG	5UTR
Solyc01g090290.3.1	229	AUG	5UTR	AT1G18040.1	83	CUG	5UTR
Solyc01g090290.3.1	278	AUG	Annotated TIS	AT1G18070.3	85	AUA	5UTR
Solyc01g090340.2.1	46	AUG	CDS	AT1G18070.3	130	AUG	Annotated TIS
Solyc01g090340.2.1	65	AUG	CDS	AT1G18080.1	125	AUG	Annotated TIS
Solyc01g090380.3.1	175	AUG	CDS	AT1G18100.1	15	ACG	5UTR
Solyc01g090480.3.1	52	AUG	Annotated TIS	AT1G18100.1	41	CUG	5UTR
Solyc01g090560.3.1	1	AUG	Annotated TIS	AT1G18210.1	155	AUG	Annotated TIS
Solyc01g090670.3.1	123	AUG	Annotated TIS	AT1G18250.2	116	UCU	5UTR
Solyc01g090690.3.1	417	AUG	Annotated TIS	AT1G18250.2	146	AUG	Annotated TIS
Solyc01g090720.3.1	127	AUG	Annotated TIS	AT1G18330.2	133	AUU	5UTR
Solyc01g090740.3.1	124	AUG	Annotated TIS	AT1G18370.1	218	UUG	5UTR
Solyc01g090750.3.1	265	AUG	Annotated TIS	AT1G18450.1	152	AUG	Annotated TIS
Solyc01g090750.3.1	203	UUG	5UTR	AT1G18540.1	33	AUG	Annotated TIS
Solyc01g090760.3.1	78	AUG	Annotated TIS	AT1G18600.1	366	AUG	Annotated TIS
Solyc01g090790.3.1	304	AUG	Annotated TIS	AT1G18660.4	319	ACG	5UTR
Solyc01g090790.3.1	254	UUG	5UTR	AT1G18670.3	182	AUG	5UTR
Solyc01g090800.3.1	350	AUG	Annotated TIS	AT1G18720.1	553	AUG	Annotated TIS
Solyc01g090800.3.1	332	AUU	5UTR	AT1G18740.1	169	CUG	5UTR
Solyc01g090850.3.1	136	AUG	Annotated TIS	AT1G18740.1	142	CUG	5UTR
Solyc01g090860.3.1	154	AUG	5UTR	AT1G18850.1	253	AUG	Annotated TIS
Solyc01g090880.3.1	64	AUG	Annotated TIS	AT1G18850.1	205	AUU	5UTR
Solyc01g090900.3.1	37	AUG	5UTR	AT1G18890.1	244	AUG	5UTR
Solyc01g090940.3.1	143	AUG	CDS	AT1G19140.2	103	AUG	Annotated TIS
Solyc01g090940.3.1	68	AUG	5UTR	AT1G19310.1	37	AUG	5UTR
Solyc01g090970.3.1	1	AUG	Annotated TIS	AT1G19360.1	356	AUG	Annotated TIS
Solyc01g091040.3.1	645	AUG	Annotated TIS	AT1G19370.1	257	AUG	5UTR
Solyc01g091070.3.1	118	AUG	5UTR	AT1G19380.1	256	AUG	Annotated TIS
Solyc01g091120.3.1	111	AUG	5UTR	AT1G19600.1	129	AUG	5UTR
Solyc01g091120.3.1	197	AUG	5UTR	AT1G19660.1	353	AUG	Annotated TIS
Solyc01g091190.3.1	359	AUG	Annotated TIS	AT1G19660.1	308	CUG	5UTR
Solyc01g091190.3.1	151	AUG	5UTR	AT1G19680.1	271	AUG	5UTR
Solyc01g091190.3.1	295	UUG	5UTR	AT1G19740.1	75	AUG	Annotated TIS
Solyc01g091200.3.1	158	AUA	CDS	AT1G19770.1	102	AUG	Annotated TIS
Solyc01g091210.3.1	115	AUG	CDS	AT1G19800.1	78	AUG	5UTR
Solyc01g091220.3.1	120	AUG	Annotated TIS	AT1G19835.1	214	CUG	5UTR
Solyc01g091260.3.1	107	AUG	Annotated TIS	AT1G19850.1	247	AUG	5UTR
Solyc01g091310.3.1	447	AUG	Annotated TIS	AT1G19850.1	355	UUG	5UTR
Solyc01g091320.3.1	240	UUG	5UTR	AT1G19860.2	115	AUG	5UTR
Solyc01g091320.3.1	292	AUG	5UTR	AT1G19860.2	212	AUG	5UTR
Solyc01g091340.3.1	121	AUG	Annotated TIS	AT1G19870.1	227	AUA	5UTR
Solyc01g091360.3.1	86	AUG	Annotated TIS	AT1G19870.1	280	AUG	Annotated TIS
Solyc01g091490.3.1	373	AUG	Annotated TIS	AT1G19880.1	291	CUG	5UTR
Solyc01g091520.3.1	194	AUG	CDS	AT1G19880.1	197	CUG	5UTR
Solyc01g091530.3.1	1	AUG	Annotated TIS	AT1G19880.1	249	ACG	5UTR
Solyc01g091530.3.1	179	AUG	CDS	AT1G19910.1	317	AUG	Annotated TIS
Solyc01g091590.3.1	25	AUG	CDS	AT1G19920.1	78	AUG	5UTR
Solyc01g091600.3.1	84	AUU	5UTR	AT1G19970.1	71	AUG	5UTR
Solyc01g091620.3.1	131	AUG	Annotated TIS	AT1G19970.1	219	AUG	Annotated TIS
Solyc01g091620.3.1	77	AUU	5UTR	AT1G19990.1	110	AUG	Annotated TIS
Solyc01g091630.3.1	652	AUG	CDS	AT1G20010.1	403	UCC	CDS
Solyc01g091630.3.1	477	CUG	5UTR	AT1G20020.1	227	AUG	Annotated TIS
Solyc01g091630.3.1	87	AUG	5UTR	AT1G20090.1	261	AAG	5UTR
Solyc01g091640.3.1	338	AUG	5UTR	AT1G20090.1	190	AUC	5UTR
Solyc01g091640.3.1	276	AUG	5UTR	AT1G20090.1	242	GGG	5UTR
Solyc01g091640.3.1	397	AUG	Annotated TIS	AT1G20100.1	151	AUU	5UTR
Solyc01g091650.3.1	115	AUG	Annotated TIS	AT1G20100.1	236	CUG	5UTR
Solyc01g091710.3.1	304	AUG	5UTR	AT1G20100.1	133	AUC	5UTR
Solyc01g091730.3.1	158	GUG	5UTR	AT1G20100.1	338	AUG	Annotated TIS
Solyc01g091730.3.1	110	AUU	5UTR	AT1G20100.1	197	AUU	5UTR
Solyc01g091770.3.1	1055	AUG	5UTR	AT1G20140.1	206	ACG	CDS
Solyc01g091770.3.1	1360	AUG	5UTR	AT1G20140.1	119	AUG	Annotated TIS
Solyc01g091770.3.1	1124	AUG	5UTR	AT1G20200.1	73	CUG	5UTR
Solyc01g091800.3.1	52	AUG	CDS	AT1G20220.1	295	AUG	Annotated TIS
Solyc01g091860.3.1	89	AUG	Annotated TIS	AT1G20220.1	182	ACG	5UTR
Solyc01g091880.3.1	206	AUG	Annotated TIS	AT1G20220.1	249	AUU	5UTR
Solyc01g091890.3.1	152	AUG	Annotated TIS	AT1G20225.1	63	AUG	Annotated TIS
Solyc01g091900.3.1	703	AUG	Annotated TIS	AT1G20270.1	240	AUG	Annotated TIS
Solyc01g091910.4.1	802	AUG	5UTR	AT1G20270.1	116	AUG	5UTR
Solyc01g091910.4.1	622	AUG	5UTR	AT1G20300.1	73	AUG	Annotated TIS
Solyc01g091910.4.1	574	AUG	5UTR	AT1G20330.1	254	CCA	CDS
Solyc01g091940.3.1	1	AUG	Annotated TIS	AT1G20330.1	179	AUG	Annotated TIS
Solyc01g091950.3.1	148	AUG	CDS	AT1G20340.1	69	ACG	5UTR
Solyc01g093970.4.1	152	AUG	5UTR	AT1G20340.1	120	AUG	Annotated TIS
Solyc01g094010.3.1	52	AUG	Annotated TIS	AT1G20350.1	110	AUG	Annotated TIS
Solyc01g094040.3.1	207	AUG	Annotated TIS	AT1G20380.1	435	AUG	CDS
Solyc01g094040.3.1	120	AUG	5UTR	AT1G20410.1	118	AUG	CDS
Solyc01g094080.3.1	98	AUG	CDS	AT1G20430.1	90	AUG	Annotated TIS
Solyc01g094150.3.1	243	AUG	5UTR	AT1G20460.1	565	AUG	Annotated TIS
Solyc01g094210.2.1	153	AUG	Annotated TIS	AT1G20460.1	623	AUG	CDS
Solyc01g094280.3.1	1	AUG	Annotated TIS	AT1G20460.1	480	ACG	5UTR
Solyc01g094290.3.1	277	AUG	5UTR	AT1G20480.1	75	AUG	Annotated TIS
Solyc01g094340.3.1	362	AUG	5UTR	AT1G20580.1	63	UUG	5UTR
Solyc01g094370.3.1	127	AUA	5UTR	AT1G20610.1	182	ACG	5UTR
Solyc01g094370.3.1	233	AUG	Annotated TIS	AT1G20630.1	132	AUC	5UTR
Solyc01g094370.3.1	182	UUG	5UTR	AT1G20630.1	177	AUG	Annotated TIS
Solyc01g094410.3.1	163	AUG	Annotated TIS	AT1G20693.1	215	AUG	Annotated TIS
Solyc01g094410.3.1	115	CUG	5UTR	AT1G20696.2	182	AUG	Annotated TIS
Solyc01g094460.3.1	536	AUG	5UTR	AT1G20696.2	153	AUC	5UTR
Solyc01g094460.3.1	1130	AUG	5UTR	AT1G20696.2	321	AAG	CDS
Solyc01g094460.3.1	1188	AUG	5UTR	AT1G20760.1	218	AUG	Annotated TIS
Solyc01g094460.3.1	716	AUG	5UTR	AT1G20770.1	250	AUG	Annotated TIS
Solyc01g094470.3.1	152	AUG	Annotated TIS	AT1G20890.1	174	AUG	Annotated TIS
Solyc01g094480.3.1	143	AUG	Annotated TIS	AT1G20930.1	34	CUG	5UTR
Solyc01g094550.3.1	587	AUG	Annotated TIS	AT1G21000.1	315	AUG	Annotated TIS
Solyc01g094550.3.1	547	CUG	5UTR	AT1G21000.1	234	CUG	5UTR
Solyc01g094570.3.1	273	AUG	5UTR	AT1G21065.1	303	AUG	CDS
Solyc01g094630.3.1	570	AUG	5UTR	AT1G21160.1	665	AUG	5UTR
Solyc01g094630.3.1	18	CUG	5UTR	AT1G21190.1	175	AUG	CDS
Solyc01g094660.3.1	505	AUG	5UTR	AT1G21210.1	513	AAA	5UTR
Solyc01g094700.3.1	44	AUG	Annotated TIS	AT1G21380.1	140	AUG	5UTR
Solyc01g094720.3.1	77	UUG	5UTR	AT1G21690.3	62	AUG	Annotated TIS
Solyc01g094750.3.1	1	AUG	Annotated TIS	AT1G21710.1	120	AUG	Annotated TIS
Solyc01g094770.3.1	117	AUG	Annotated TIS	AT1G21720.1	213	AUG	Annotated TIS
Solyc01g094770.3.1	67	AUC	5UTR	AT1G21880.2	300	AUG	Annotated TIS
Solyc01g094780.3.1	259	AUG	Annotated TIS	AT1G21900.1	133	AUG	Annotated TIS
Solyc01g094790.3.1	321	AUG	Annotated TIS	AT1G21930.1	170	AUG	Annotated TIS
Solyc01g094790.3.1	295	GUG	5UTR	AT1G21980.1	111	AUG	5UTR
Solyc01g094810.3.1	164	AUG	Annotated TIS	AT1G21980.1	205	AUA	5UTR
Solyc01g094835.1.1	132	AUG	Annotated TIS	AT1G21980.1	265	AUG	5UTR
Solyc01g094860.3.1	597	AUG	Annotated TIS	AT1G22015.1	95	AUG	Annotated TIS
Solyc01g094880.3.1	334	AUG	Annotated TIS	AT1G22030.1	515	AUG	Annotated TIS
Solyc01g094880.3.1	221	AUG	5UTR	AT1G22030.1	475	AUC	5UTR
Solyc01g094920.3.1	58	AUG	CDS	AT1G22180.2	281	AUG	Annotated TIS
Solyc01g094930.3.1	70	AUG	Annotated TIS	AT1G22190.1	99	UUG	5UTR
Solyc01g094940.3.1	177	AUA	5UTR	AT1G22190.1	160	CUG	5UTR
Solyc01g094940.3.1	220	AUG	5UTR	AT1G22190.1	465	AUG	Annotated TIS
Solyc01g094950.3.1	252	AUG	CDS	AT1G22190.1	362	UUU	5UTR
Solyc01g094950.3.1	195	AUG	Annotated TIS	AT1G22190.1	179	UUG	5UTR
Solyc01g094960.3.1	276	GUG	5UTR	AT1G22190.1	411	CUG	5UTR
Solyc01g094960.3.1	246	CUG	5UTR	AT1G22270.1	114	AUG	Annotated TIS
Solyc01g095000.3.1	1	AUG	Annotated TIS	AT1G22300.1	484	AUC	CDS
Solyc01g095010.3.1	743	AUG	Annotated TIS	AT1G22300.1	237	AUU	5UTR
Solyc01g095010.3.1	652	UUG	5UTR	AT1G22300.1	546	AUU	CDS
Solyc01g095020.3.1	157	AUG	5UTR	AT1G22300.1	428	GUA	CDS
Solyc01g095020.3.1	445	AUG	5UTR	AT1G22410.1	163	AUU	5UTR
Solyc01g095030.3.1	213	AUG	Annotated TIS	AT1G22410.1	221	AUC	5UTR
Solyc01g095040.3.1	70	AUG	5UTR	AT1G22450.1	327	AUG	Annotated TIS
Solyc01g095050.3.1	2	CUG	5UTR	AT1G22450.1	268	UUG	5UTR
Solyc01g095050.3.1	23	ACG	5UTR	AT1G22450.1	248	GUG	5UTR
Solyc01g095070.3.1	303	AUG	CDS	AT1G22510.2	236	AUG	5UTR
Solyc01g095070.3.1	201	AUG	Annotated TIS	AT1G22520.2	115	AUG	Annotated TIS
Solyc01g095070.3.1	137	CUG	5UTR	AT1G22530.1	239	AUG	Annotated TIS
Solyc01g095120.3.1	314	AUG	CDS	AT1G22660.4	217	AUG	CDS
Solyc01g095140.3.1	97	AUG	Annotated TIS	AT1G22700.1	85	AUG	Annotated TIS
Solyc01g095150.3.1	26	AUA	5UTR	AT1G22700.1	42	ACG	5UTR
Solyc01g095150.3.1	81	AUG	Annotated TIS	AT1G22730.1	229	AUG	5UTR
Solyc01g095180.2.1	219	AUG	CDS	AT1G22760.1	314	AUG	CDS
Solyc01g095200.3.1	197	AUG	Annotated TIS	AT1G22770.1	114	AUG	5UTR
Solyc01g095210.3.1	1024	AUG	Annotated TIS	AT1G22770.1	447	UUC	CDS
Solyc01g095210.3.1	900	AUG	5UTR	AT1G22780.1	127	AUG	Annotated TIS
Solyc01g095220.2.1	180	AUA	3UTR	AT1G22790.1	120	AUG	5UTR
Solyc01g095230.3.1	137	AUG	Annotated TIS	AT1G22840.1	38	ACG	5UTR
Solyc01g095240.3.1	110	AUG	CDS	AT1G22840.1	98	AUG	Annotated TIS
Solyc01g095240.3.1	34	AUG	CDS	AT1G22850.1	4	AUG	5UTR
Solyc01g095270.3.1	1	AUG	Annotated TIS	AT1G22850.1	207	AUG	CDS
Solyc01g095280.3.1	217	AUG	5UTR	AT1G22882.1	392	AUG	5UTR
Solyc01g095280.3.1	177	AUU	5UTR	AT1G22910.3	17	AUG	5UTR
Solyc01g095300.3.1	86	AUG	5UTR	AT1G22920.1	121	AUU	5UTR
Solyc01g095300.3.1	284	AUG	5UTR	AT1G22920.1	167	AUG	Annotated TIS
Solyc01g095370.3.1	71	AUG	5UTR	AT1G22930.1	171	AUU	5UTR
Solyc01g095410.3.1	1	AUG	Annotated TIS	AT1G22930.1	236	AUG	Annotated TIS
Solyc01g095420.3.1	85	AUG	CDS	AT1G22950.1	94	AUG	5UTR
Solyc01g095430.3.1	121	AUG	Annotated TIS	AT1G23080.1	174	CUG	5UTR
Solyc01g095460.3.1	147	AUG	5UTR	AT1G23080.1	137	CUG	5UTR
Solyc01g095460.3.1	330	AUG	Annotated TIS	AT1G23080.1	195	ACG	5UTR
Solyc01g095460.3.1	264	GUG	5UTR	AT1G23080.1	245	AUG	Annotated TIS
Solyc01g095470.3.1	397	AUG	5UTR	AT1G23080.1	491	CUC	CDS
Solyc01g095470.3.1	281	CUG	5UTR	AT1G23100.1	92	AUG	Annotated TIS
Solyc01g095470.3.1	331	AUG	5UTR	AT1G23100.1	32	AUU	5UTR
Solyc01g095490.3.1	248	AUG	Annotated TIS	AT1G23100.1	53	GUA	5UTR
Solyc01g095510.3.1	161	AUG	Annotated TIS	AT1G23150.1	7	AUC	5UTR
Solyc01g095520.3.1	80	AUG	Annotated TIS	AT1G23150.1	58	AUU	5UTR
Solyc01g095530.2.1	137	AUG	Annotated TIS	AT1G23150.1	120	AUA	5UTR
Solyc01g095570.3.1	431	AUG	Annotated TIS	AT1G23150.1	169	GUG	5UTR
Solyc01g095570.3.1	370	GUG	5UTR	AT1G23150.1	400	AUG	Annotated TIS
Solyc01g095570.3.1	341	CUG	5UTR	AT1G23190.1	139	AUG	Annotated TIS
Solyc01g095570.3.1	387	AUU	5UTR	AT1G23260.1	78	AUU	5UTR
Solyc01g095580.3.1	509	CUG	5UTR	AT1G23280.1	146	AUG	Annotated TIS
Solyc01g095580.3.1	664	AUG	CDS	AT1G23280.1	329	UUA	CDS
Solyc01g095580.3.1	646	AUG	Annotated TIS	AT1G23290.1	83	AUG	Annotated TIS
Solyc01g095580.3.1	478	AUG	5UTR	AT1G23310.1	425	AUG	Annotated TIS
Solyc01g095610.3.1	153	AUG	Annotated TIS	AT1G23310.1	213	AUG	5UTR
Solyc01g095620.3.1	1	AUG	Annotated TIS	AT1G23310.1	163	GUG	5UTR
Solyc01g095630.3.1	188	AUG	Annotated TIS	AT1G23360.1	49	AUG	Annotated TIS
Solyc01g095630.3.1	122	AUG	5UTR	AT1G23390.1	284	AUG	Annotated TIS
Solyc01g095670.3.1	147	AUG	Annotated TIS	AT1G23410.1	91	CAG	CDS
Solyc01g095680.2.1	160	AUU	5UTR	AT1G23410.1	214	UUG	CDS
Solyc01g095680.2.1	140	CUG	5UTR	AT1G23465.1	132	AUG	Annotated TIS
Solyc01g095680.2.1	207	AUG	5UTR	AT1G23550.1	123	AUA	5UTR
Solyc01g095690.2.1	1	AUG	Annotated TIS	AT1G23710.1	113	AUU	5UTR
Solyc01g095900.3.1	373	AUG	5UTR	AT1G23740.1	392	AUG	CDS
Solyc01g095900.3.1	490	AUG	Annotated TIS	AT1G23740.1	181	AUG	Annotated TIS
Solyc01g095970.3.1	228	AUG	Annotated TIS	AT1G23750.1	209	AUG	Annotated TIS
Solyc01g095980.3.1	437	AUG	5UTR	AT1G23780.1	51	AUG	Annotated TIS
Solyc01g095980.3.1	478	AUG	Annotated TIS	AT1G23780.1	124	AUG	CDS
Solyc01g096060.3.1	146	CUG	CDS	AT1G23790.1	155	AUG	Annotated TIS
Solyc01g096080.3.1	289	AUG	Annotated TIS	AT1G23820.1	1	AUG	Annotated TIS
Solyc01g096110.3.1	72	AUG	Annotated TIS	AT1G23860.1	246	AUG	Annotated TIS
Solyc01g096130.3.1	19	AUG	Annotated TIS	AT1G23860.1	354	CCU	CDS
Solyc01g096185.1.1	1	AUG	Annotated TIS	AT1G23860.1	135	AUG	5UTR
Solyc01g096190.3.1	291	AUG	5UTR	AT1G23915.1	156	UAC	CDS
Solyc01g096190.3.1	351	AUG	Annotated TIS	AT1G23915.1	79	AUG	CDS
Solyc01g096200.3.1	210	AUG	5UTR	AT1G24050.1	251	UAC	CDS
Solyc01g096200.3.1	162	GUG	5UTR	AT1G24050.1	90	AUG	Annotated TIS
Solyc01g096200.3.1	107	AUU	5UTR	AT1G24095.1	263	AUG	CDS
Solyc01g096240.3.1	1287	AUG	5UTR	AT1G24095.1	121	AUG	Annotated TIS
Solyc01g096250.2.1	89	AUG	Annotated TIS	AT1G24095.1	101	AUG	5UTR
Solyc01g096270.3.1	126	AUG	5UTR	AT1G24120.1	159	GAA	5UTR
Solyc01g096270.3.1	201	AUG	Annotated TIS	AT1G24120.1	144	AUA	5UTR
Solyc01g096290.3.1	185	AUG	CDS	AT1G24120.1	220	AUG	5UTR
Solyc01g096360.3.1	666	AUG	Annotated TIS	AT1G24160.1	273	AUG	5UTR
Solyc01g096360.3.1	581	AUG	5UTR	AT1G24170.1	368	AUG	5UTR
Solyc01g096370.3.1	55	AUG	CDS	AT1G24180.1	121	AUG	Annotated TIS
Solyc01g096370.3.1	1	AUG	Annotated TIS	AT1G24190.3	180	AUG	Annotated TIS
Solyc01g096370.3.1	85	AUG	CDS	AT1G24190.3	85	CUG	5UTR
Solyc01g096390.3.1	99	AUG	5UTR	AT1G24240.1	100	CAA	CDS
Solyc01g096450.3.1	2	AUG	5UTR	AT1G24267.2	33	AUU	5UTR
Solyc01g096460.2.1	138	AUG	5UTR	AT1G24267.2	178	AUG	5UTR
Solyc01g096460.2.1	60	AUG	5UTR	AT1G24267.2	244	AUG	Annotated TIS
Solyc01g096470.3.1	564	AUG	5UTR	AT1G24280.1	158	AUG	Annotated TIS
Solyc01g096475.1.1	1	AUG	Annotated TIS	AT1G24300.1	102	AUC	5UTR
Solyc01g096490.3.1	108	GUG	5UTR	AT1G24310.1	113	AUG	5UTR
Solyc01g096500.3.1	764	AUG	5UTR	AT1G24350.3	248	AUG	Annotated TIS
Solyc01g096500.3.1	601	AUG	5UTR	AT1G24360.1	383	CAG	CDS
Solyc01g096500.3.1	932	AUA	5UTR	AT1G24360.1	152	AUU	5UTR
Solyc01g096510.2.1	104	AUG	Annotated TIS	AT1G24360.1	239	AUG	Annotated TIS
Solyc01g096570.3.1	185	AUG	Annotated TIS	AT1G24360.1	182	CUG	5UTR
Solyc01g096590.3.1	251	AUG	Annotated TIS	AT1G24360.1	207	UUG	5UTR
Solyc01g096600.3.1	358	AUG	Annotated TIS	AT1G24450.1	105	AUG	Annotated TIS
Solyc01g096610.3.1	357	AUG	Annotated TIS	AT1G24510.1	83	GUG	5UTR
Solyc01g096620.3.1	1101	AUG	Annotated TIS	AT1G24510.1	203	CAA	CDS
Solyc01g096620.3.1	804	AUC	5UTR	AT1G24510.1	146	AUG	Annotated TIS
Solyc01g096620.3.1	841	UUG	5UTR	AT1G24530.1	61	AUG	Annotated TIS
Solyc01g096620.3.1	874	CUG	5UTR	AT1G24610.1	115	AUG	Annotated TIS
Solyc01g096660.3.1	1084	AUG	Annotated TIS	AT1G24880.2	194	CUG	CDS
Solyc01g096670.3.1	1	AUG	Annotated TIS	AT1G24880.2	82	AUU	5UTR
Solyc01g096700.3.1	1	AUG	Annotated TIS	AT1G24881.1	127	AUG	CDS
Solyc01g096710.3.1	158	AUG	5UTR	AT1G25054.1	1	AUG	Annotated TIS
Solyc01g096710.3.1	59	AUG	5UTR	AT1G25055.1	85	AUG	CDS
Solyc01g096800.3.1	116	AUU	5UTR	AT1G25145.1	1	AUG	Annotated TIS
Solyc01g096810.3.1	126	AUA	5UTR	AT1G25150.1	62	AUG	CDS
Solyc01g096880.3.1	20	AUG	CDS	AT1G25210.2	1	AUG	Annotated TIS
Solyc01g096900.3.1	1330	AUG	CDS	AT1G25211.1	62	AUG	CDS
Solyc01g096900.3.1	1279	AUG	Annotated TIS	AT1G25260.1	28	UUG	5UTR
Solyc01g096990.3.1	334	AUG	Annotated TIS	AT1G25260.1	109	AUG	Annotated TIS
Solyc01g097020.3.1	76	AUG	Annotated TIS	AT1G25350.2	57	AUG	Annotated TIS
Solyc01g097120.3.1	968	AUG	Annotated TIS	AT1G25375.1	209	AUG	Annotated TIS
Solyc01g097120.3.1	920	AUC	5UTR	AT1G25390.1	457	AUG	5UTR
Solyc01g097160.3.1	117	AUG	Annotated TIS	AT1G25490.1	176	AUG	Annotated TIS
Solyc01g097170.3.1	108	AUG	Annotated TIS	AT1G25490.1	119	CUG	5UTR
Solyc01g097270.3.1	108	AUG	Annotated TIS	AT1G25520.1	238	AUG	Annotated TIS
Solyc01g097290.3.1	1	AUG	Annotated TIS	AT1G25550.1	319	AUG	Annotated TIS
Solyc01g097310.3.1	1	AUG	Annotated TIS	AT1G25550.1	267	AUG	5UTR
Solyc01g097310.3.1	114	AUG	CDS	AT1G25570.1	188	AUG	Annotated TIS
Solyc01g097340.3.1	102	AUG	Annotated TIS	AT1G25580.1	318	AUG	Annotated TIS
Solyc01g097350.3.1	142	AUG	CDS	AT1G25682.1	89	AUU	5UTR
Solyc01g097360.3.1	55	AUG	CDS	AT1G25682.1	136	AUG	Annotated TIS
Solyc01g097440.3.1	140	AUG	Annotated TIS	AT1G26110.1	400	AUG	Annotated TIS
Solyc01g097450.3.1	1337	AUG	Annotated TIS	AT1G26160.1	105	AUG	Annotated TIS
Solyc01g097460.3.1	1	AUG	Annotated TIS	AT1G26180.1	152	AUG	Annotated TIS
Solyc01g097500.3.1	291	AUG	5UTR	AT1G26220.1	18	AUG	Annotated TIS
Solyc01g097520.3.1	500	AUG	Annotated TIS	AT1G26230.1	79	AUG	Annotated TIS
Solyc01g097530.2.1	147	UUG	CDS	AT1G26270.1	174	UUG	5UTR
Solyc01g097610.3.1	22	AUG	CDS	AT1G26270.1	326	AUG	5UTR
Solyc01g097740.3.1	82	ACG	5UTR	AT1G26270.1	267	UUG	5UTR
Solyc01g097760.3.1	192	AUG	Annotated TIS	AT1G26330.2	107	AUG	Annotated TIS
Solyc01g097770.3.1	273	AUG	5UTR	AT1G26340.1	82	AUC	5UTR
Solyc01g097770.3.1	169	AUG	5UTR	AT1G26340.1	129	AUG	Annotated TIS
Solyc01g097790.3.1	1441	AUG	5UTR	AT1G26370.1	112	UUG	5UTR
Solyc01g097800.3.1	118	AUG	Annotated TIS	AT1G26470.1	44	AUG	Annotated TIS
Solyc01g097810.3.1	84	AUG	Annotated TIS	AT1G26515.1	1	AUG	Annotated TIS
Solyc01g097810.3.1	15	UUG	5UTR	AT1G26530.1	484	CUG	5UTR
Solyc01g097830.2.1	42	AUG	5UTR	AT1G26550.1	65	CUG	5UTR
Solyc01g097840.3.1	315	AUG	5UTR	AT1G26580.1	365	AUG	5UTR
Solyc01g097860.3.1	265	AUG	Annotated TIS	AT1G26630.1	121	AUC	5UTR
Solyc01g097870.3.1	30	CUG	5UTR	AT1G26630.1	169	AUG	Annotated TIS
Solyc01g097870.3.1	87	AUG	Annotated TIS	AT1G26660.2	125	AUG	Annotated TIS
Solyc01g097880.3.1	127	AUG	Annotated TIS	AT1G26660.2	82	GUG	5UTR
Solyc01g097890.2.1	112	AUG	Annotated TIS	AT1G26665.1	201	AUG	Annotated TIS
Solyc01g097910.2.1	158	AUG	Annotated TIS	AT1G26670.1	281	AUU	5UTR
Solyc01g097910.2.1	131	GUG	5UTR	AT1G26730.1	164	AUG	5UTR
Solyc01g097980.3.1	241	AUG	CDS	AT1G26730.1	400	AUG	Annotated TIS
Solyc01g098000.3.1	68	AUG	Annotated TIS	AT1G26740.1	98	AUG	Annotated TIS
Solyc01g098030.3.1	1	AUG	Annotated TIS	AT1G26750.1	1	AUG	Annotated TIS
Solyc01g098080.3.1	401	AUG	5UTR	AT1G26770.2	56	AUG	CDS
Solyc01g098090.3.1	81	CUG	5UTR	AT1G26830.1	378	AUG	Annotated TIS
Solyc01g098110.3.1	4034	AUG	3UTR	AT1G26830.1	328	AUU	5UTR
Solyc01g098160.3.1	719	AUG	5UTR	AT1G26840.1	153	AUG	Annotated TIS
Solyc01g098160.3.1	1398	AUG	5UTR	AT1G26850.1	395	AUG	Annotated TIS
Solyc01g098190.3.1	200	AUG	5UTR	AT1G26880.1	260	CGU	CDS
Solyc01g098350.3.1	103	AUG	5UTR	AT1G26880.1	200	AUG	Annotated TIS
Solyc01g098350.3.1	210	AUG	Annotated TIS	AT1G26945.1	222	UUC	5UTR
Solyc01g098390.3.1	230	AUG	5UTR	AT1G27050.1	54	AUG	Annotated TIS
Solyc01g098390.3.1	319	AUG	5UTR	AT1G27090.1	147	CUG	5UTR
Solyc01g098390.3.1	109	CUG	5UTR	AT1G27090.1	272	AUG	Annotated TIS
Solyc01g098410.3.1	170	AUG	CDS	AT1G27090.1	163	AUC	5UTR
Solyc01g098410.3.1	102	AUG	Annotated TIS	AT1G27090.1	205	GUG	5UTR
Solyc01g098430.3.1	86	AUG	5UTR	AT1G27090.1	221	ACG	5UTR
Solyc01g098500.3.1	307	AUG	5UTR	AT1G27150.1	170	AUG	Annotated TIS
Solyc01g098540.3.1	297	AUG	5UTR	AT1G27190.1	319	AUG	Annotated TIS
Solyc01g098550.3.1	196	AUG	CDS	AT1G27190.1	243	AUG	5UTR
Solyc01g098560.3.1	148	AUG	5UTR	AT1G27310.1	268	AUG	CDS
Solyc01g098560.3.1	231	AUG	Annotated TIS	AT1G27310.1	170	ACG	5UTR
Solyc01g098570.2.1	177	ACG	CDS	AT1G27320.1	286	AUG	5UTR
Solyc01g098570.2.1	116	AUG	CDS	AT1G27330.1	189	AUU	5UTR
Solyc01g098570.2.1	48	GUG	5UTR	AT1G27330.1	216	AUG	Annotated TIS
Solyc01g098580.3.1	85	AUG	CDS	AT1G27340.1	227	AUG	5UTR
Solyc01g098580.3.1	7	AUG	Annotated TIS	AT1G27350.1	265	AUU	5UTR
Solyc01g098590.3.1	95	AUG	Annotated TIS	AT1G27350.1	315	GUG	5UTR
Solyc01g098600.3.1	264	AUG	5UTR	AT1G27350.1	289	AUU	5UTR
Solyc01g098610.3.1	402	AUU	CDS	AT1G27350.1	337	AUG	Annotated TIS
Solyc01g098610.3.1	250	AUG	5UTR	AT1G27385.4	1	AUG	Annotated TIS
Solyc01g098640.3.1	443	AUG	Annotated TIS	AT1G27390.1	235	GAG	CDS
Solyc01g098645.1.1	440	AUG	Annotated TIS	AT1G27390.1	139	AUG	Annotated TIS
Solyc01g098725.1.1	1	AUG	Annotated TIS	AT1G27390.1	286	CCU	CDS
Solyc01g098740.3.1	254	AUG	Annotated TIS	AT1G27400.1	219	GCC	CDS
Solyc01g098800.3.1	581	AUG	CDS	AT1G27400.1	117	AUG	Annotated TIS
Solyc01g098800.3.1	647	AUG	CDS	AT1G27450.3	385	CUG	CDS
Solyc01g098800.3.1	425	AUG	5UTR	AT1G27450.3	295	GUG	CDS
Solyc01g098810.3.1	157	CUG	5UTR	AT1G27470.1	86	AUG	Annotated TIS
Solyc01g098810.3.1	198	AUG	Annotated TIS	AT1G27510.1	169	AUG	Annotated TIS
Solyc01g098810.3.1	58	UUG	5UTR	AT1G27530.1	88	AUU	5UTR
Solyc01g098810.3.1	114	UUG	5UTR	AT1G27565.1	91	AUC	5UTR
Solyc01g098840.3.1	635	ACG	5UTR	AT1G27565.1	118	AUU	5UTR
Solyc01g098870.3.1	76	AUG	5UTR	AT1G27565.1	43	GUG	5UTR
Solyc01g098880.3.1	160	AUG	Annotated TIS	AT1G27565.1	69	AUU	5UTR
Solyc01g098900.3.1	186	AUG	Annotated TIS	AT1G27595.1	206	AUG	Annotated TIS
Solyc01g098910.3.1	124	UUG	5UTR	AT1G27595.1	108	AUU	5UTR
Solyc01g098920.3.1	174	AUC	5UTR	AT1G27595.1	159	ACG	5UTR
Solyc01g098990.3.1	27	AUG	Annotated TIS	AT1G27630.1	213	AUU	5UTR
Solyc01g099010.3.1	409	AUG	Annotated TIS	AT1G27630.1	97	AUA	5UTR
Solyc01g099020.3.1	21	AUG	5UTR	AT1G27650.1	200	AUG	Annotated TIS
Solyc01g099020.3.1	86	AUG	Annotated TIS	AT1G27680.1	301	UGG	5UTR
Solyc01g099090.3.1	106	AUG	5UTR	AT1G27680.1	162	CUG	5UTR
Solyc01g099090.3.1	177	AUG	Annotated TIS	AT1G27690.1	41	CUG	5UTR
Solyc01g099100.3.1	244	ACG	5UTR	AT1G27695.1	109	GUG	CDS
Solyc01g099100.3.1	265	CUG	5UTR	AT1G27700.1	151	AUG	Annotated TIS
Solyc01g099100.3.1	326	AUG	Annotated TIS	AT1G27760.3	165	AUG	5UTR
Solyc01g099130.3.1	113	AUG	Annotated TIS	AT1G27760.3	104	CUG	5UTR
Solyc01g099160.3.1	60	AUG	CDS	AT1G27770.1	197	AUG	Annotated TIS
Solyc01g099230.3.1	219	AUG	Annotated TIS	AT1G27840.3	66	CUG	5UTR
Solyc01g099240.3.1	1	AUG	Annotated TIS	AT1G27850.1	374	AUG	5UTR
Solyc01g099260.3.1	82	AUG	Annotated TIS	AT1G27930.1	581	AUA	5UTR
Solyc01g099280.3.1	311	AUG	5UTR	AT1G27930.1	622	AUG	Annotated TIS
Solyc01g099280.3.1	371	AUG	5UTR	AT1G27960.1	84	AUU	5UTR
Solyc01g099340.3.1	260	AUG	Annotated TIS	AT1G27960.1	493	AUA	CDS
Solyc01g099350.3.1	226	GUG	5UTR	AT1G27970.2	111	AUG	Annotated TIS
Solyc01g099360.3.1	216	AUG	Annotated TIS	AT1G28050.1	276	AUG	5UTR
Solyc01g099370.3.1	1	AUG	Annotated TIS	AT1G28110.1	65	AUG	Annotated TIS
Solyc01g099400.3.1	386	CUG	CDS	AT1G28120.1	95	CUG	5UTR
Solyc01g099410.3.1	79	AUG	Annotated TIS	AT1G28250.1	50	AUG	Annotated TIS
Solyc01g099410.3.1	28	AUU	5UTR	AT1G28280.1	84	AUG	Annotated TIS
Solyc01g099520.3.1	1	AUG	Annotated TIS	AT1G28390.2	76	AUG	Annotated TIS
Solyc01g099560.3.1	304	AUG	Annotated TIS	AT1G28395.1	87	AUG	Annotated TIS
Solyc01g099590.3.1	50	AUG	Annotated TIS	AT1G28400.1	204	AUG	Annotated TIS
Solyc01g099590.3.1	106	AUG	CDS	AT1G28410.1	518	CUG	5UTR
Solyc01g099600.3.1	223	AUG	CDS	AT1G28420.1	5674	AUA	3UTR
Solyc01g099600.3.1	173	AUC	CDS	AT1G28510.1	133	AUG	5UTR
Solyc01g099630.3.1	133	AUU	5UTR	AT1G28960.1	132	AUG	Annotated TIS
Solyc01g099630.3.1	202	AUG	Annotated TIS	AT1G29030.1	94	AUG	Annotated TIS
Solyc01g099630.3.1	171	CUG	5UTR	AT1G29030.1	39	AUA	5UTR
Solyc01g099670.3.1	43	CUG	5UTR	AT1G29060.1	253	AUG	Annotated TIS
Solyc01g099670.3.1	98	AUG	Annotated TIS	AT1G29070.1	94	AUG	Annotated TIS
Solyc01g099680.3.1	35	AUA	5UTR	AT1G29195.1	180	AUG	5UTR
Solyc01g099680.3.1	95	AUG	Annotated TIS	AT1G29220.2	152	AUG	Annotated TIS
Solyc01g099715.1.1	80	AUG	CDS	AT1G29250.1	208	AUG	Annotated TIS
Solyc01g099715.1.1	31	AUG	CDS	AT1G29250.1	151	GUG	5UTR
Solyc01g099740.3.1	160	AUG	Annotated TIS	AT1G29300.1	206	AUG	Annotated TIS
Solyc01g099740.3.1	20	CUG	5UTR	AT1G29320.2	105	AUG	Annotated TIS
Solyc01g099760.3.1	106	AUG	CDS	AT1G29350.1	168	GUG	5UTR
Solyc01g099770.3.1	230	AUG	Annotated TIS	AT1G29350.1	119	CUG	5UTR
Solyc01g099780.3.1	1	AUG	Annotated TIS	AT1G29350.1	165	AUA	5UTR
Solyc01g099790.3.1	315	AUU	5UTR	AT1G29370.1	159	GUG	5UTR
Solyc01g099790.3.1	197	AUC	5UTR	AT1G29370.1	110	CUG	5UTR
Solyc01g099830.3.1	103	AUU	5UTR	AT1G29370.1	156	AUA	5UTR
Solyc01g099830.3.1	165	AUG	Annotated TIS	AT1G29400.1	125	AUG	Annotated TIS
Solyc01g099840.3.1	112	AUG	Annotated TIS	AT1G29470.1	315	CUG	5UTR
Solyc01g099840.3.1	87	GUG	5UTR	AT1G29470.1	195	AUG	5UTR
Solyc01g099840.3.1	50	ACG	5UTR	AT1G29690.1	293	AUG	Annotated TIS
Solyc01g099860.3.1	165	AUG	5UTR	AT1G29690.1	133	AUG	5UTR
Solyc01g099910.3.1	80	AUG	Annotated TIS	AT1G29840.1	332	AUG	CDS
Solyc01g100010.3.1	713	AUG	Annotated TIS	AT1G29850.3	113	AUG	5UTR
Solyc01g100030.4.1	63	AUG	CDS	AT1G29880.1	187	AUG	Annotated TIS
Solyc01g100040.3.1	127	AUG	5UTR	AT1G29880.1	304	AUG	CDS
Solyc01g100040.3.1	246	AUA	5UTR	AT1G29880.1	246	AUU	CDS
Solyc01g100050.3.1	832	AUG	Annotated TIS	AT1G29900.1	209	AUG	Annotated TIS
Solyc01g100050.3.1	690	CUG	5UTR	AT1G29910.1	362	AGG	CDS
Solyc01g100110.3.1	230	AUG	5UTR	AT1G29910.1	470	GGA	CDS
Solyc01g100110.3.1	167	AUU	5UTR	AT1G29920.1	183	AGG	CDS
Solyc01g100110.3.1	137	AUU	5UTR	AT1G29930.1	187	AUG	Annotated TIS
Solyc01g100160.3.1	159	CUG	5UTR	AT1G29930.1	400	GGA	CDS
Solyc01g100160.3.1	91	AUU	5UTR	AT1G29930.1	292	AGG	CDS
Solyc01g100160.3.1	220	AUG	Annotated TIS	AT1G29940.1	155	AUG	Annotated TIS
Solyc01g100170.3.1	200	GUG	5UTR	AT1G29950.1	58	UUG	5UTR
Solyc01g100190.3.1	79	AUG	Annotated TIS	AT1G29950.1	109	AUC	5UTR
Solyc01g100200.3.1	1	AUG	Annotated TIS	AT1G29990.1	134	AUG	Annotated TIS
Solyc01g100230.3.1	156	AUG	5UTR	AT1G30040.1	313	AUG	Annotated TIS
Solyc01g100240.3.1	531	AUG	Annotated TIS	AT1G30070.2	29	UUC	5UTR
Solyc01g100240.3.1	625	AUG	CDS	AT1G30070.2	69	AUG	Annotated TIS
Solyc01g100250.3.1	253	AUA	5UTR	AT1G30120.1	204	AUG	Annotated TIS
Solyc01g100250.3.1	306	AUG	5UTR	AT1G30210.1	221	AUG	5UTR
Solyc01g100250.3.1	407	GUG	5UTR	AT1G30230.2	42	CUG	5UTR
Solyc01g100330.3.1	410	AUG	Annotated TIS	AT1G30230.2	86	AUG	Annotated TIS
Solyc01g100330.3.1	364	UUG	5UTR	AT1G30240.2	358	AUG	Annotated TIS
Solyc01g100350.3.1	648	AUG	Annotated TIS	AT1G30270.1	352	AUG	5UTR
Solyc01g100350.3.1	605	AUU	5UTR	AT1G30300.1	112	AUG	Annotated TIS
Solyc01g100360.3.1	214	AUG	Annotated TIS	AT1G30380.1	143	AUG	Annotated TIS
Solyc01g100380.3.1	54	AUG	Annotated TIS	AT1G30460.1	106	AUG	Annotated TIS
Solyc01g100410.3.1	86	AUG	5UTR	AT1G30475.1	88	AUG	CDS
Solyc01g100430.3.1	61	ACG	5UTR	AT1G30490.1	192	AUG	5UTR
Solyc01g100480.3.1	222	AUG	Annotated TIS	AT1G30500.2	221	AUG	Annotated TIS
Solyc01g100490.3.1	1	AUG	Annotated TIS	AT1G30510.2	294	AGC	CDS
Solyc01g100500.3.1	250	AUG	Annotated TIS	AT1G30510.2	147	AUU	5UTR
Solyc01g100520.3.1	87	AUG	Annotated TIS	AT1G30510.2	201	AUG	Annotated TIS
Solyc01g100530.3.1	395	CUG	5UTR	AT1G30510.2	126	AUC	5UTR
Solyc01g100530.3.1	436	AUG	Annotated TIS	AT1G30545.2	869	AUA	3UTR
Solyc01g100570.3.1	86	AUG	Annotated TIS	AT1G30545.2	96	AUG	Annotated TIS
Solyc01g100590.3.1	170	AUG	5UTR	AT1G30580.1	182	AUG	Annotated TIS
Solyc01g100590.3.1	261	AUG	Annotated TIS	AT1G30580.1	425	CCU	CDS
Solyc01g100610.3.1	337	AUG	5UTR	AT1G30620.1	424	AUG	Annotated TIS
Solyc01g100610.3.1	279	AUG	5UTR	AT1G30630.1	150	AUG	Annotated TIS
Solyc01g100660.3.1	259	AUG	Annotated TIS	AT1G30630.1	102	ACG	5UTR
Solyc01g100690.3.1	91	AUG	5UTR	AT1G30640.1	161	AUG	5UTR
Solyc01g100720.3.1	178	AUG	Annotated TIS	AT1G30680.1	139	AUG	5UTR
Solyc01g100760.2.1	95	AUG	Annotated TIS	AT1G30680.1	187	AUG	Annotated TIS
Solyc01g100770.2.1	40	AUG	CDS	AT1G30690.1	182	AUG	Annotated TIS
Solyc01g100770.2.1	95	AUG	CDS	AT1G30690.1	135	AUA	5UTR
Solyc01g100810.3.1	166	AUG	5UTR	AT1G30690.1	156	AUC	5UTR
Solyc01g100810.3.1	82	AUU	5UTR	AT1G30825.1	199	AUG	Annotated TIS
Solyc01g100810.3.1	321	AUG	CDS	AT1G30845.1	112	AUG	Annotated TIS
Solyc01g100820.3.1	98	AUG	Annotated TIS	AT1G30845.1	58	AUC	5UTR
Solyc01g100840.3.1	129	AUG	Annotated TIS	AT1G30880.1	93	AUG	Annotated TIS
Solyc01g100860.3.1	1	AUG	Annotated TIS	AT1G30960.1	108	AUG	Annotated TIS
Solyc01g100870.3.1	124	CUG	5UTR	AT1G30970.3	67	AUU	5UTR
Solyc01g100870.3.1	176	AUG	Annotated TIS	AT1G31010.1	155	AUG	CDS
Solyc01g100930.3.1	1701	AUG	Annotated TIS	AT1G31010.1	87	AUG	Annotated TIS
Solyc01g100970.3.1	1185	AUG	CDS	AT1G31070.2	289	AUA	CDS
Solyc01g101000.3.1	743	AUG	5UTR	AT1G31120.1	43	CUG	5UTR
Solyc01g101000.3.1	839	AUG	5UTR	AT1G31130.1	194	AUU	5UTR
Solyc01g101020.3.1	1042	AUG	5UTR	AT1G31150.1	274	AAC	CDS
Solyc01g101040.3.1	219	AUA	5UTR	AT1G31160.1	115	AUG	Annotated TIS
Solyc01g101040.3.1	266	AUU	5UTR	AT1G31175.1	169	AUG	CDS
Solyc01g101060.3.1	70	AUG	CDS	AT1G31180.2	101	AUG	CDS
Solyc01g101100.3.1	659	AUG	Annotated TIS	AT1G31190.1	90	AUG	Annotated TIS
Solyc01g101100.3.1	152	AUG	5UTR	AT1G31230.1	130	CCG	CDS
Solyc01g101100.3.1	252	AUU	5UTR	AT1G31300.1	156	UUG	5UTR
Solyc01g101100.3.1	294	AUG	5UTR	AT1G31300.1	95	AUG	5UTR
Solyc01g101100.3.1	419	AUG	5UTR	AT1G31320.1	97	AUU	5UTR
Solyc01g101120.3.1	142	AUG	Annotated TIS	AT1G31330.1	203	AUG	Annotated TIS
Solyc01g101130.3.1	1076	CUG	5UTR	AT1G31335.1	166	AUA	5UTR
Solyc01g101130.3.1	930	AUG	5UTR	AT1G31340.1	275	AUG	CDS
Solyc01g101130.3.1	863	AUG	5UTR	AT1G31340.1	250	GUC	CDS
Solyc01g101130.3.1	780	AUG	5UTR	AT1G31340.1	202	AUG	Annotated TIS
Solyc01g101140.3.1	125	AUC	5UTR	AT1G31420.1	86	AAG	5UTR
Solyc01g101140.3.1	163	ACG	5UTR	AT1G31420.1	147	UUA	5UTR
Solyc01g101160.2.1	156	AUG	Annotated TIS	AT1G31440.1	160	CUG	5UTR
Solyc01g101160.2.1	109	AUG	5UTR	AT1G31440.1	336	AUG	Annotated TIS
Solyc01g101250.3.1	403	AUG	Annotated TIS	AT1G31550.2	98	GGC	CDS
Solyc01g102290.3.1	182	AUG	Annotated TIS	AT1G31660.1	1445	GUG	3UTR
Solyc01g102290.3.1	144	CUG	5UTR	AT1G31660.1	101	AUG	Annotated TIS
Solyc01g102310.3.1	140	UUG	5UTR	AT1G31730.1	271	AUG	5UTR
Solyc01g102310.3.1	198	AUG	Annotated TIS	AT1G31730.1	191	CUG	5UTR
Solyc01g102330.3.1	10	AUG	Annotated TIS	AT1G31780.1	95	AUG	5UTR
Solyc01g102350.3.1	279	AUG	Annotated TIS	AT1G31790.1	46	AUG	Annotated TIS
Solyc01g102370.3.1	106	AUG	Annotated TIS	AT1G31810.1	752	AUG	Annotated TIS
Solyc01g102390.3.1	79	AUA	5UTR	AT1G31810.1	708	GUG	5UTR
Solyc01g102400.3.1	171	AUA	5UTR	AT1G31812.1	135	AUG	Annotated TIS
Solyc01g102480.3.1	1162	AUG	Annotated TIS	AT1G31812.1	89	CUG	5UTR
Solyc01g102500.3.1	1	AUG	Annotated TIS	AT1G31860.1	78	AUG	Annotated TIS
Solyc01g102510.3.1	414	AUA	5UTR	AT1G31870.1	175	AUG	Annotated TIS
Solyc01g102570.3.1	222	AUG	Annotated TIS	AT1G31910.1	979	GCU	CDS
Solyc01g102580.3.1	1	AUG	Annotated TIS	AT1G31970.1	159	AUG	Annotated TIS
Solyc01g102610.3.1	276	AUG	Annotated TIS	AT1G32050.1	232	AUG	Annotated TIS
Solyc01g102660.3.1	157	AUG	5UTR	AT1G32050.1	372	AUU	CDS
Solyc01g102700.3.1	911	AUG	5UTR	AT1G32070.2	50	AUG	Annotated TIS
Solyc01g102750.3.1	104	AUU	5UTR	AT1G32090.1	126	AUG	Annotated TIS
Solyc01g102760.3.1	58	AUG	5UTR	AT1G32130.1	321	GUG	CDS
Solyc01g102760.3.1	137	AUG	5UTR	AT1G32130.1	59	AUC	5UTR
Solyc01g102820.3.1	63	CUG	5UTR	AT1G32150.1	107	AUC	5UTR
Solyc01g102820.3.1	86	AUG	Annotated TIS	AT1G32150.1	165	AUU	5UTR
Solyc01g102830.3.1	172	AUG	Annotated TIS	AT1G32170.1	52	AUG	5UTR
Solyc01g102840.3.1	183	AUG	Annotated TIS	AT1G32190.1	284	AUG	5UTR
Solyc01g102840.3.1	114	UUG	5UTR	AT1G32200.1	174	AUG	Annotated TIS
Solyc01g102950.3.1	90	AUG	CDS	AT1G32210.1	215	AUG	Annotated TIS
Solyc01g102950.3.1	53	AUG	Annotated TIS	AT1G32220.1	185	AUG	Annotated TIS
Solyc01g102980.3.1	255	AUG	5UTR	AT1G32230.1	100	AUG	5UTR
Solyc01g103010.3.1	220	AUG	5UTR	AT1G32230.1	268	ACG	5UTR
Solyc01g103020.3.1	31	UUG	5UTR	AT1G32260.1	49	AUG	5UTR
Solyc01g103040.3.1	65	AUC	5UTR	AT1G32330.1	101	AUG	5UTR
Solyc01g103050.3.1	430	AUG	Annotated TIS	AT1G32330.1	238	AUG	Annotated TIS
Solyc01g103050.3.1	28	AUG	5UTR	AT1G32360.1	240	AUG	5UTR
Solyc01g103050.3.1	294	AUG	5UTR	AT1G32380.1	118	AUA	5UTR
Solyc01g103050.3.1	116	AUU	5UTR	AT1G32380.1	300	AUG	Annotated TIS
Solyc01g103050.3.1	272	AUG	5UTR	AT1G32400.1	241	AUG	5UTR
Solyc01g103080.3.1	254	AUG	Annotated TIS	AT1G32400.1	428	AUA	CDS
Solyc01g103110.3.1	356	AUG	Annotated TIS	AT1G32400.1	186	AUC	5UTR
Solyc01g103160.3.1	1	AUG	Annotated TIS	AT1G32410.1	104	AUG	Annotated TIS
Solyc01g103170.3.1	596	GUG	5UTR	AT1G32440.1	167	AUA	5UTR
Solyc01g103170.3.1	826	AUG	Annotated TIS	AT1G32450.1	386	CUA	CDS
Solyc01g103200.3.1	155	AUG	CDS	AT1G32490.1	170	AUC	5UTR
Solyc01g103220.3.1	113	AUG	Annotated TIS	AT1G32520.1	195	ACG	CDS
Solyc01g103370.3.1	106	AUG	Annotated TIS	AT1G32530.1	110	AUG	Annotated TIS
Solyc01g103370.3.1	76	CUG	5UTR	AT1G32580.1	566	AUG	Annotated TIS
Solyc01g103400.3.1	61	AUG	Annotated TIS	AT1G32630.1	171	CUG	5UTR
Solyc01g103410.3.1	236	AUG	CDS	AT1G32640.1	495	AUG	Annotated TIS
Solyc01g103410.3.1	175	AUG	Annotated TIS	AT1G32640.1	522	AUG	CDS
Solyc01g103420.3.1	188	AUG	5UTR	AT1G32700.1	179	AUC	5UTR
Solyc01g103430.3.1	368	AUG	5UTR	AT1G32700.1	232	GGG	CDS
Solyc01g103430.3.1	308	AUG	5UTR	AT1G32730.1	168	AUG	Annotated TIS
Solyc01g103430.3.1	262	CUG	5UTR	AT1G32750.1	53	UUG	5UTR
Solyc01g103440.3.1	164	AUG	Annotated TIS	AT1G32750.1	200	AUG	5UTR
Solyc01g103480.3.1	284	AUG	Annotated TIS	AT1G32790.2	153	AUU	5UTR
Solyc01g103480.3.1	227	GUG	5UTR	AT1G32790.2	93	AUG	5UTR
Solyc01g103490.3.1	267	AUG	5UTR	AT1G32790.2	200	AUG	Annotated TIS
Solyc01g103490.3.1	168	CUG	5UTR	AT1G32810.2	214	AUG	5UTR
Solyc01g103490.3.1	235	CUG	5UTR	AT1G32860.1	189	AUU	5UTR
Solyc01g103490.3.1	595	AUG	CDS	AT1G32860.1	247	AUG	Annotated TIS
Solyc01g103540.3.1	719	AUG	Annotated TIS	AT1G32920.1	145	AUG	Annotated TIS
Solyc01g103580.3.1	389	AUG	Annotated TIS	AT1G32960.1	102	AUG	Annotated TIS
Solyc01g103700.3.1	1811	AUG	3UTR	AT1G32990.1	172	AUG	Annotated TIS
Solyc01g103700.3.1	1677	AUA	3UTR	AT1G33030.1	109	AUG	Annotated TIS
Solyc01g103700.3.1	1735	AUU	3UTR	AT1G33040.1	125	AUG	Annotated TIS
Solyc01g103750.3.1	120	AUG	5UTR	AT1G33055.1	23	UUG	5UTR
Solyc01g103760.3.1	56	UUG	5UTR	AT1G33060.2	163	AUG	CDS
Solyc01g103760.3.1	112	CUG	5UTR	AT1G33120.1	108	AUG	Annotated TIS
Solyc01g103770.3.1	67	AUG	5UTR	AT1G33140.1	136	AUG	Annotated TIS
Solyc01g103780.3.1	59	AUG	CDS	AT1G33230.2	401	CUG	5UTR
Solyc01g103800.3.1	146	AUG	Annotated TIS	AT1G33230.2	466	AUG	5UTR
Solyc01g103800.3.1	95	UUG	5UTR	AT1G33240.1	549	AUG	CDS
Solyc01g103890.3.1	65	AUG	5UTR	AT1G33250.1	355	GUG	5UTR
Solyc01g103930.3.1	122	AUA	5UTR	AT1G33265.1	68	AUG	Annotated TIS
Solyc01g103940.3.1	393	AUG	5UTR	AT1G33270.1	143	CUG	5UTR
Solyc01g103940.3.1	64	AUG	5UTR	AT1G33290.1	27	AUG	Annotated TIS
Solyc01g103940.3.1	174	AUG	5UTR	AT1G33400.2	44	AUG	5UTR
Solyc01g103950.3.1	2330	AUG	Annotated TIS	AT1G33410.2	34	AUG	Annotated TIS
Solyc01g103950.3.1	2462	AUG	CDS	AT1G33420.1	167	CUG	5UTR
Solyc01g103970.3.1	874	AUU	5UTR	AT1G33420.1	231	AUG	Annotated TIS
Solyc01g103980.3.1	460	AUG	Annotated TIS	AT1G33490.1	185	AUG	Annotated TIS
Solyc01g103990.3.1	108	AUC	5UTR	AT1G33490.1	130	GUG	5UTR
Solyc01g103990.3.1	223	GUG	5UTR	AT1G33520.1	250	AUG	Annotated TIS
Solyc01g104030.3.1	40	AUG	CDS	AT1G33540.1	1481	AUC	3UTR
Solyc01g104030.3.1	1	AUG	Annotated TIS	AT1G33560.1	325	AUG	Annotated TIS
Solyc01g104040.3.1	80	AUG	5UTR	AT1G33680.1	65	AUU	5UTR
Solyc01g104100.3.1	191	AUG	CDS	AT1G33780.1	76	AUA	5UTR
Solyc01g104110.3.1	174	AUG	CDS	AT1G33780.1	369	ACC	CDS
Solyc01g104110.3.1	100	AUG	Annotated TIS	AT1G33780.1	198	AUG	Annotated TIS
Solyc01g104130.3.1	396	AUG	Annotated TIS	AT1G33780.1	143	AUC	5UTR
Solyc01g104130.3.1	338	AUG	5UTR	AT1G33780.1	101	CUG	5UTR
Solyc01g104170.3.1	147	AUG	Annotated TIS	AT1G33980.2	127	AUG	Annotated TIS
Solyc01g104190.2.1	97	AUG	Annotated TIS	AT1G34000.1	65	AUG	Annotated TIS
Solyc01g104240.3.1	407	AUG	5UTR	AT1G34020.1	204	AUG	5UTR
Solyc01g104270.3.1	85	AUG	5UTR	AT1G34030.1	90	AUG	Annotated TIS
Solyc01g104270.3.1	151	AUG	Annotated TIS	AT1G34030.1	20	CUG	5UTR
Solyc01g104310.3.1	95	AUG	5UTR	AT1G34030.1	41	ACG	5UTR
Solyc01g104310.3.1	181	AUG	CDS	AT1G34130.1	65	AUG	5UTR
Solyc01g104320.3.1	87	AUG	Annotated TIS	AT1G34150.1	205	AUG	Annotated TIS
Solyc01g104350.3.1	81	UUG	5UTR	AT1G34180.2	5	UUG	CDS
Solyc01g104370.3.1	127	AUG	Annotated TIS	AT1G34190.1	325	AUG	Annotated TIS
Solyc01g104370.3.1	83	AUU	5UTR	AT1G34210.1	349	AUG	5UTR
Solyc01g104470.3.1	73	AUG	Annotated TIS	AT1G34220.1	44	AUC	5UTR
Solyc01g104480.3.1	203	AUG	5UTR	AT1G34300.1	91	AUG	Annotated TIS
Solyc01g104480.3.1	153	AUG	5UTR	AT1G34320.1	329	AUG	5UTR
Solyc01g104510.3.1	14	AUA	5UTR	AT1G34320.1	199	AUU	5UTR
Solyc01g104530.3.1	247	AUG	5UTR	AT1G34350.2	160	AUG	Annotated TIS
Solyc01g104580.3.1	177	AUG	Annotated TIS	AT1G34360.1	126	AUC	5UTR
Solyc01g104650.3.1	1073	AUG	5UTR	AT1G34370.1	550	UUU	CDS
Solyc01g104660.3.1	236	AUG	Annotated TIS	AT1G34370.1	208	AUU	5UTR
Solyc01g104660.3.1	132	AUG	5UTR	AT1G34370.1	299	CUG	CDS
Solyc01g104670.3.1	383	AUG	5UTR	AT1G34370.1	121	AUG	5UTR
Solyc01g104670.3.1	361	AUG	5UTR	AT1G34370.1	245	UUG	5UTR
Solyc01g104670.3.1	299	AUG	5UTR	AT1G34430.1	140	AUG	Annotated TIS
Solyc01g104685.1.1	1	AUG	Annotated TIS	AT1G34470.1	295	AUG	5UTR
Solyc01g104700.3.1	1	AUG	Annotated TIS	AT1G34550.1	283	AUG	CDS
Solyc01g104710.3.1	1	AUG	Annotated TIS	AT1G34750.1	294	AUG	5UTR
Solyc01g104720.3.1	101	AUG	Annotated TIS	AT1G34770.4	20	AUG	Annotated TIS
Solyc01g104740.3.1	1	AUG	Annotated TIS	AT1G35140.1	107	AUG	Annotated TIS
Solyc01g104740.3.1	41	AUC	CDS	AT1G35160.2	139	AUG	Annotated TIS
Solyc01g104775.1.1	247	AUG	Annotated TIS	AT1G35320.1	517	ACG	3UTR
Solyc01g104970.3.1	456	AUU	5UTR	AT1G35320.1	778	AUG	3UTR
Solyc01g105010.3.1	230	AUG	CDS	AT1G35340.1	161	AUG	CDS
Solyc01g105010.3.1	67	AUG	Annotated TIS	AT1G35420.2	153	AUG	CDS
Solyc01g105020.3.1	126	AUG	5UTR	AT1G35470.2	172	AUG	Annotated TIS
Solyc01g105020.3.1	95	AUG	5UTR	AT1G35470.2	117	CUG	5UTR
Solyc01g105030.3.1	102	AUG	Annotated TIS	AT1G35510.1	189	CUG	5UTR
Solyc01g105050.3.1	1	AUG	Annotated TIS	AT1G35510.1	246	AUG	5UTR
Solyc01g105060.3.1	164	AUG	Annotated TIS	AT1G35530.2	53	AUG	5UTR
Solyc01g105070.3.1	71	AUG	Annotated TIS	AT1G35580.1	118	ACG	5UTR
Solyc01g105120.3.1	112	CUG	5UTR	AT1G35580.1	66	AUU	5UTR
Solyc01g105120.3.1	285	AUG	5UTR	AT1G35620.1	159	AUG	Annotated TIS
Solyc01g105120.3.1	344	AUG	CDS	AT1G35660.1	136	AUG	Annotated TIS
Solyc01g105140.3.1	100	AUG	Annotated TIS	AT1G35670.1	51	CUG	5UTR
Solyc01g105150.3.1	714	AUG	5UTR	AT1G35670.1	112	AUG	Annotated TIS
Solyc01g105165.1.1	154	AUG	Annotated TIS	AT1G35680.1	95	AUG	Annotated TIS
Solyc01g105230.3.1	61	AUG	Annotated TIS	AT1G35720.1	137	AUG	Annotated TIS
Solyc01g105270.3.1	64	AUG	Annotated TIS	AT1G35780.1	212	AUA	5UTR
Solyc01g105280.3.1	68	CUG	5UTR	AT1G35780.1	176	AUA	5UTR
Solyc01g105280.3.1	176	UUG	5UTR	AT1G35830.1	220	AUG	5UTR
Solyc01g105280.3.1	215	AUG	Annotated TIS	AT1G35910.1	208	AUG	Annotated TIS
Solyc01g105290.3.1	398	AUG	CDS	AT1G36050.1	78	ACG	5UTR
Solyc01g105290.3.1	190	CUG	CDS	AT1G36050.1	44	ACG	5UTR
Solyc01g105290.3.1	265	CUG	CDS	AT1G36060.1	243	AUG	5UTR
Solyc01g105310.3.1	141	AUG	Annotated TIS	AT1G36060.1	186	AUG	5UTR
Solyc01g105340.3.1	88	AUG	5UTR	AT1G36060.1	91	AUU	5UTR
Solyc01g105340.3.1	272	AUG	Annotated TIS	AT1G36060.1	116	AUU	5UTR
Solyc01g105360.3.1	86	AUG	Annotated TIS	AT1G36060.1	359	AUG	5UTR
Solyc01g105450.3.1	352	AUG	5UTR	AT1G36060.1	144	UUG	5UTR
Solyc01g105560.3.1	166	AUG	Annotated TIS	AT1G36070.1	346	AUC	5UTR
Solyc01g105680.3.1	1734	AUG	Annotated TIS	AT1G36085.1	284	UAC	5UTR
Solyc01g105710.3.1	53	AUG	5UTR	AT1G36085.1	96	AUU	5UTR
Solyc01g105720.2.1	153	AUG	5UTR	AT1G36240.1	32	AUG	CDS
Solyc01g105720.2.1	90	AUG	5UTR	AT1G36280.1	96	GAG	CDS
Solyc01g105720.2.1	37	AUU	5UTR	AT1G36310.1	274	AUG	CDS
Solyc01g105780.3.1	41	AUG	Annotated TIS	AT1G36310.1	123	AUG	5UTR
Solyc01g105890.3.1	79	AUG	Annotated TIS	AT1G36310.1	222	AUG	CDS
Solyc01g105920.3.1	308	AUG	5UTR	AT1G36320.1	103	AUG	Annotated TIS
Solyc01g105920.3.1	372	AUG	Annotated TIS	AT1G36320.1	74	AUG	5UTR
Solyc01g105980.3.1	76	AUG	5UTR	AT1G36370.1	164	AUG	Annotated TIS
Solyc01g105990.3.1	73	AUG	Annotated TIS	AT1G36370.1	224	AUG	CDS
Solyc01g106010.3.1	79	AUG	Annotated TIS	AT1G36380.1	153	AUG	Annotated TIS
Solyc01g106010.3.1	193	AUG	CDS	AT1G36380.1	103	AUU	5UTR
Solyc01g106020.3.1	172	AUG	Annotated TIS	AT1G36390.1	50	AUG	Annotated TIS
Solyc01g106050.3.1	835	AUG	Annotated TIS	AT1G36730.1	202	UUG	5UTR
Solyc01g106050.3.1	740	AUG	5UTR	AT1G36730.1	81	AUC	5UTR
Solyc01g106050.3.1	642	AUG	5UTR	AT1G36730.1	264	AUG	5UTR
Solyc01g106060.3.1	68	AUG	Annotated TIS	AT1G36730.1	333	AAA	5UTR
Solyc01g106080.3.1	505	AUG	Annotated TIS	AT1G36730.1	167	AUU	5UTR
Solyc01g106090.3.1	127	AUG	Annotated TIS	AT1G36980.1	269	AUG	Annotated TIS
Solyc01g106120.3.1	387	AUG	5UTR	AT1G36990.1	240	AUU	5UTR
Solyc01g106210.3.1	134	AUG	Annotated TIS	AT1G36990.1	127	AUU	5UTR
Solyc01g106210.3.1	101	AUU	5UTR	AT1G36990.1	105	AUC	5UTR
Solyc01g106253.1.1	101	AUG	5UTR	AT1G36990.1	177	AUC	5UTR
Solyc01g106280.3.1	160	AUG	5UTR	AT1G38131.1	115	AUG	5UTR
Solyc01g106310.3.1	99	AUG	Annotated TIS	AT1G38131.1	80	AUG	5UTR
Solyc01g106320.2.1	120	AUG	5UTR	AT1G41830.1	610	CUG	CDS
Solyc01g106320.2.1	179	AUG	Annotated TIS	AT1G41880.1	70	AUA	5UTR
Solyc01g106400.3.1	20	AUG	5UTR	AT1G41880.1	188	UCG	CDS
Solyc01g106400.3.1	60	AUG	Annotated TIS	AT1G41880.1	116	AUG	Annotated TIS
Solyc01g106420.3.1	136	AUG	CDS	AT1G42430.1	221	AUG	5UTR
Solyc01g106430.3.1	99	AUA	5UTR	AT1G42430.1	114	CUG	5UTR
Solyc01g106440.3.1	325	AUG	Annotated TIS	AT1G42440.1	167	AUG	Annotated TIS
Solyc01g106440.3.1	209	AUG	5UTR	AT1G42440.1	109	AUU	5UTR
Solyc01g106450.3.1	132	AUG	Annotated TIS	AT1G42480.1	287	AUA	CDS
Solyc01g106470.3.1	161	AUG	Annotated TIS	AT1G42960.1	77	CUG	5UTR
Solyc01g106470.3.1	109	AUU	5UTR	AT1G42960.1	121	AUG	Annotated TIS
Solyc01g106480.3.1	429	AUG	Annotated TIS	AT1G42970.1	200	AUG	Annotated TIS
Solyc01g106560.3.1	374	AUG	Annotated TIS	AT1G42990.1	113	UCU	CDS
Solyc01g106570.3.1	197	AUG	5UTR	AT1G42990.1	205	AUC	CDS
Solyc01g106680.3.1	338	AUG	5UTR	AT1G43130.1	44	CUG	5UTR
Solyc01g106690.3.1	35	AUG	Annotated TIS	AT1G43130.1	97	AUG	Annotated TIS
Solyc01g106700.3.1	1	AUG	Annotated TIS	AT1G43170.1	351	CCU	CDS
Solyc01g106770.3.1	3840	AUG	5UTR	AT1G43170.1	255	AUG	Annotated TIS
Solyc01g106770.3.1	3793	AUG	5UTR	AT1G43190.1	249	AUG	Annotated TIS
Solyc01g106780.3.1	576	AUG	5UTR	AT1G43190.1	199	AUU	5UTR
Solyc01g106790.3.1	107	CUG	5UTR	AT1G43560.1	53	AUG	Annotated TIS
Solyc01g106790.3.1	125	AUG	5UTR	AT1G43580.1	125	AUG	Annotated TIS
Solyc01g106790.3.1	165	AUG	Annotated TIS	AT1G43670.1	837	CUG	5UTR
Solyc01g106820.3.1	19	AUG	5UTR	AT1G43670.1	738	AUG	5UTR
Solyc01g106820.3.1	89	AUG	Annotated TIS	AT1G43670.1	887	AUG	Annotated TIS
Solyc01g106830.3.1	101	AUG	Annotated TIS	AT1G43690.1	108	AUG	5UTR
Solyc01g106880.3.1	2526	AUG	3UTR	AT1G43690.1	229	AUG	5UTR
Solyc01g106900.3.1	91	AUG	Annotated TIS	AT1G43690.1	166	AUG	5UTR
Solyc01g107010.3.1	79	AUG	Annotated TIS	AT1G43710.1	165	AUG	Annotated TIS
Solyc01g107030.3.1	39	AUG	Annotated TIS	AT1G43710.1	63	ACG	5UTR
Solyc01g107090.2.1	185	AUG	Annotated TIS	AT1G43710.1	110	AUU	5UTR
Solyc01g107100.3.1	49	AUG	CDS	AT1G43800.1	142	AUG	Annotated TIS
Solyc01g107130.3.1	417	AUG	CDS	AT1G43850.1	393	AUU	5UTR
Solyc01g107130.3.1	363	AUG	CDS	AT1G43850.1	586	AUG	5UTR
Solyc01g107150.3.1	201	AUG	Annotated TIS	AT1G43890.1	277	ACG	CDS
Solyc01g107170.2.1	127	AUG	Annotated TIS	AT1G43890.1	148	AUG	Annotated TIS
Solyc01g107180.3.1	753	AUG	5UTR	AT1G43900.1	32	AUG	CDS
Solyc01g107180.3.1	419	AUG	5UTR	AT1G44110.1	116	CUG	5UTR
Solyc01g107180.3.1	846	AUG	Annotated TIS	AT1G44350.1	362	AUG	Annotated TIS
Solyc01g107180.3.1	643	AUG	5UTR	AT1G44575.1	208	CUC	CDS
Solyc01g107180.3.1	707	AUG	5UTR	AT1G44750.1	51	CUG	5UTR
Solyc01g107190.3.1	497	CUG	5UTR	AT1G44770.1	164	AUG	Annotated TIS
Solyc01g107190.3.1	560	AUG	Annotated TIS	AT1G44810.1	182	AUG	Annotated TIS
Solyc01g107190.3.1	600	AUG	CDS	AT1G44810.1	270	AUG	CDS
Solyc01g107210.3.1	121	AUG	CDS	AT1G44835.2	50	CUG	5UTR
Solyc01g107250.3.1	81	AUG	Annotated TIS	AT1G44835.2	109	AUG	Annotated TIS
Solyc01g107290.3.1	298	AUG	Annotated TIS	AT1G44890.1	25	AUG	5UTR
Solyc01g107300.3.1	92	AUA	CDS	AT1G44910.1	145	CUG	5UTR
Solyc01g107330.3.1	57	AUA	5UTR	AT1G44920.1	43	AUG	CDS
Solyc01g107330.3.1	195	AUG	CDS	AT1G44960.1	131	AUG	Annotated TIS
Solyc01g107350.3.1	882	AUG	5UTR	AT1G45000.1	321	AUG	CDS
Solyc01g107350.3.1	999	AUG	Annotated TIS	AT1G45050.1	131	CCA	CDS
Solyc01g107380.3.1	341	AUG	Annotated TIS	AT1G45100.1	1	AUG	Annotated TIS
Solyc01g107400.2.1	56	AUG	Annotated TIS	AT1G45145.1	246	CUG	CDS
Solyc01g107410.3.1	666	AUG	Annotated TIS	AT1G45160.2	99	AUG	5UTR
Solyc01g107450.3.1	297	AUG	Annotated TIS	AT1G45170.1	211	AUG	CDS
Solyc01g107460.2.1	91	UUC	CDS	AT1G45207.2	1	AUG	Annotated TIS
Solyc01g107470.3.1	376	AUG	Annotated TIS	AT1G45230.1	92	AUG	Annotated TIS
Solyc01g107470.3.1	248	AUG	5UTR	AT1G45248.5	131	AUG	Annotated TIS
Solyc01g107520.3.1	42	AUG	Annotated TIS	AT1G45248.5	66	UUG	5UTR
Solyc01g107550.3.1	197	AUG	Annotated TIS	AT1G45332.1	332	ACA	5UTR
Solyc01g107550.3.1	145	AUG	5UTR	AT1G45332.1	378	AUG	Annotated TIS
Solyc01g107590.3.1	196	AUU	5UTR	AT1G45474.1	60	AUG	Annotated TIS
Solyc01g107590.3.1	251	AUG	Annotated TIS	AT1G45976.1	58	AUG	Annotated TIS
Solyc01g107600.3.1	87	AUU	5UTR	AT1G46480.1	233	AUG	Annotated TIS
Solyc01g107610.3.1	183	AUG	Annotated TIS	AT1G47056.1	130	AUU	5UTR
Solyc01g107640.3.1	87	AUG	Annotated TIS	AT1G47200.1	61	AUA	5UTR
Solyc01g107640.3.1	21	AUG	5UTR	AT1G47200.1	107	AUG	Annotated TIS
Solyc01g107650.3.1	86	AUG	5UTR	AT1G47200.1	284	AUC	CDS
Solyc01g107660.3.1	81	AUG	Annotated TIS	AT1G47210.2	346	AUG	Annotated TIS
Solyc01g107660.3.1	29	AUA	5UTR	AT1G47230.2	176	AUG	Annotated TIS
Solyc01g107670.2.1	34	AUG	CDS	AT1G47240.1	198	AUG	Annotated TIS
Solyc01g107670.2.1	260	CUG	CDS	AT1G47240.1	125	ACG	5UTR
Solyc01g107700.3.1	51	AUG	Annotated TIS	AT1G47250.1	102	AUG	Annotated TIS
Solyc01g107740.3.1	151	AUG	Annotated TIS	AT1G47260.1	138	AUG	Annotated TIS
Solyc01g107740.3.1	112	AUU	5UTR	AT1G47265.1	74	GAG	5UTR
Solyc01g107740.3.1	83	GUG	5UTR	AT1G47270.1	88	ACG	5UTR
Solyc01g107750.3.1	428	AUG	Annotated TIS	AT1G47278.2	47	AUU	5UTR
Solyc01g107820.2.1	255	AUG	Annotated TIS	AT1G47310.1	344	AUG	Annotated TIS
Solyc01g107860.3.1	164	AUG	Annotated TIS	AT1G47340.1	164	AUG	CDS
Solyc01g107860.3.1	109	AUG	5UTR	AT1G47380.1	110	AUG	5UTR
Solyc01g107860.3.1	292	AUG	CDS	AT1G47420.1	88	AUG	Annotated TIS
Solyc01g107870.3.1	436	AUC	5UTR	AT1G47420.1	202	CUG	CDS
Solyc01g107870.3.1	265	AUU	5UTR	AT1G47490.1	282	AUA	5UTR
Solyc01g107870.3.1	309	AUU	5UTR	AT1G47490.1	329	AUG	Annotated TIS
Solyc01g107880.3.1	136	ACG	5UTR	AT1G47500.1	250	AUG	Annotated TIS
Solyc01g107880.3.1	183	AUG	Annotated TIS	AT1G47530.1	172	AUG	Annotated TIS
Solyc01g107900.3.1	434	AUG	Annotated TIS	AT1G47550.2	50	AUG	Annotated TIS
Solyc01g107910.3.1	28	AUG	CDS	AT1G47640.1	60	ACG	5UTR
Solyc01g107980.3.1	1	AUG	Annotated TIS	AT1G47640.1	86	CUG	5UTR
Solyc01g107990.3.1	299	AUG	5UTR	AT1G47720.1	76	AUG	Annotated TIS
Solyc01g108010.3.1	1	AUG	Annotated TIS	AT1G47720.1	164	AUG	CDS
Solyc01g108087.1.1	1	AUG	Annotated TIS	AT1G47740.1	256	AUG	5UTR
Solyc01g108130.3.1	433	AUG	CDS	AT1G47740.1	207	AUC	5UTR
Solyc01g108130.3.1	262	AUG	Annotated TIS	AT1G47750.1	26	AUG	Annotated TIS
Solyc01g108140.3.1	379	AUG	Annotated TIS	AT1G47830.1	203	AUG	Annotated TIS
Solyc01g108150.3.1	296	AUG	Annotated TIS	AT1G47830.1	153	CUG	5UTR
Solyc01g108160.3.1	322	AUG	5UTR	AT1G47870.1	179	AUC	5UTR
Solyc01g108190.3.1	1	AUG	Annotated TIS	AT1G47870.1	241	AUG	Annotated TIS
Solyc01g108190.3.1	73	AUG	CDS	AT1G47970.1	353	AUG	Annotated TIS
Solyc01g108230.3.1	216	AUG	5UTR	AT1G48030.1	359	AUG	Annotated TIS
Solyc01g108250.3.1	167	AUG	Annotated TIS	AT1G48040.1	194	AUG	Annotated TIS
Solyc01g108250.3.1	115	AUU	5UTR	AT1G48050.1	117	AUG	Annotated TIS
Solyc01g108260.3.1	99	GUG	5UTR	AT1G48110.1	166	UUG	5UTR
Solyc01g108260.3.1	153	AUG	Annotated TIS	AT1G48140.1	177	AUG	Annotated TIS
Solyc01g108280.3.1	259	AUG	5UTR	AT1G48160.1	371	AUG	Annotated TIS
Solyc01g108300.3.1	212	CUG	5UTR	AT1G48175.1	220	AUG	Annotated TIS
Solyc01g108300.3.1	167	CUG	5UTR	AT1G48200.1	107	AUG	Annotated TIS
Solyc01g108390.3.1	186	AUG	CDS	AT1G48230.1	38	AUG	5UTR
Solyc01g108390.3.1	113	AUG	5UTR	AT1G48240.1	239	AUG	5UTR
Solyc01g108490.3.1	1	AUG	Annotated TIS	AT1G48300.1	125	AUG	Annotated TIS
Solyc01g108510.3.1	1890	UUG	3UTR	AT1G48300.1	69	AUC	5UTR
Solyc01g108540.3.1	130	AUG	Annotated TIS	AT1G48350.1	331	AAG	CDS
Solyc01g108610.3.1	1676	AUG	CDS	AT1G48410.2	214	AUG	Annotated TIS
Solyc01g108620.3.1	712	AUG	CDS	AT1G48430.1	185	AUG	Annotated TIS
Solyc01g108620.3.1	600	AUG	Annotated TIS	AT1G48440.1	156	ACG	5UTR
Solyc01g108650.2.1	31	AUG	CDS	AT1G48440.1	205	AUG	Annotated TIS
Solyc01g108660.3.1	458	AUG	Annotated TIS	AT1G48570.1	59	AUG	Annotated TIS
Solyc01g108710.3.1	59	AUG	5UTR	AT1G48580.2	174	AUG	CDS
Solyc01g108840.3.1	150	CUG	5UTR	AT1G48590.2	202	UCA	CDS
Solyc01g108840.3.1	234	AUG	Annotated TIS	AT1G48620.1	363	AUG	Annotated TIS
Solyc01g108840.3.1	101	CUG	5UTR	AT1G48630.1	110	AUG	Annotated TIS
Solyc01g109070.2.1	119	AUG	Annotated TIS	AT1G48630.1	235	CUG	CDS
Solyc01g109080.3.1	79	AUG	5UTR	AT1G48630.1	410	UUC	CDS
Solyc01g109090.2.1	97	AUG	Annotated TIS	AT1G48650.2	138	AUG	5UTR
Solyc01g109090.2.1	54	AUU	5UTR	AT1G48760.1	66	AUG	5UTR
Solyc01g109100.2.1	100	AUG	Annotated TIS	AT1G48790.1	335	AUG	5UTR
Solyc01g109110.3.1	867	AUG	Annotated TIS	AT1G48790.1	287	AUU	5UTR
Solyc01g109120.3.1	169	AUG	Annotated TIS	AT1G48830.1	62	GUG	5UTR
Solyc01g109120.3.1	123	AUA	5UTR	AT1G48830.1	42	AUU	5UTR
Solyc01g109130.3.1	119	AUG	Annotated TIS	AT1G48830.1	104	AUG	Annotated TIS
Solyc01g109180.3.1	510	AUG	Annotated TIS	AT1G48840.1	246	AUC	5UTR
Solyc01g109180.3.1	391	AUG	5UTR	AT1G48850.1	199	AUG	Annotated TIS
Solyc01g109230.3.1	1	AUG	Annotated TIS	AT1G48860.1	337	AUG	Annotated TIS
Solyc01g109250.2.1	67	AUG	CDS	AT1G48860.1	283	AUU	5UTR
Solyc01g109260.3.1	29	AUG	5UTR	AT1G48900.1	89	AUC	5UTR
Solyc01g109260.3.1	197	AUG	Annotated TIS	AT1G48900.1	142	CUG	5UTR
Solyc01g109260.3.1	155	AUU	5UTR	AT1G48950.1	204	AUG	Annotated TIS
Solyc01g109280.3.1	194	CUG	5UTR	AT1G48970.1	238	AUA	5UTR
Solyc01g109300.3.1	193	AUG	Annotated TIS	AT1G49040.1	156	AUG	5UTR
Solyc01g109330.3.1	182	AUG	Annotated TIS	AT1G49040.1	194	AUG	Annotated TIS
Solyc01g109340.3.1	324	AUG	5UTR	AT1G49140.1	112	AUG	Annotated TIS
Solyc01g109350.3.1	183	AUG	Annotated TIS	AT1G49200.1	72	AUG	Annotated TIS
Solyc01g109350.3.1	130	GUG	5UTR	AT1G49240.1	167	AUA	5UTR
Solyc01g109360.3.1	234	AUG	CDS	AT1G49240.1	192	GUG	5UTR
Solyc01g109450.3.1	189	AUG	Annotated TIS	AT1G49240.1	280	AUG	Annotated TIS
Solyc01g109460.3.1	90	AUG	Annotated TIS	AT1G49240.1	234	AUC	5UTR
Solyc01g109460.3.1	166	AUG	CDS	AT1G49300.1	248	GUU	CDS
Solyc01g109500.3.1	24	AUG	Annotated TIS	AT1G49300.1	164	AUG	Annotated TIS
Solyc01g109510.3.1	72	AUG	Annotated TIS	AT1G49300.1	105	AUC	5UTR
Solyc01g109520.3.1	161	AUG	Annotated TIS	AT1G49400.1	189	AUG	Annotated TIS
Solyc01g109520.3.1	109	ACG	5UTR	AT1G49510.1	187	AUG	CDS
Solyc01g109550.2.1	37	AUG	CDS	AT1G49510.1	142	CUC	5UTR
Solyc01g109550.2.1	55	AUG	CDS	AT1G49540.2	83	AUC	5UTR
Solyc01g109620.3.1	170	AUG	Annotated TIS	AT1G49540.2	21	AUU	5UTR
Solyc01g109640.3.1	2391	GUU	3UTR	AT1G49560.1	105	AUC	5UTR
Solyc01g109640.3.1	2354	GUG	3UTR	AT1G49590.1	215	AUG	Annotated TIS
Solyc01g109680.3.1	147	AUG	Annotated TIS	AT1G49600.2	146	AUC	5UTR
Solyc01g109690.1.1	1	AUG	Annotated TIS	AT1G49600.2	277	AUG	Annotated TIS
Solyc01g109700.3.1	317	AUG	Annotated TIS	AT1G49670.2	88	AUG	Annotated TIS
Solyc01g109700.3.1	120	UUG	5UTR	AT1G49680.1	47	AUG	CDS
Solyc01g109700.3.1	360	AUG	CDS	AT1G49740.1	250	AUG	5UTR
Solyc01g109700.3.1	208	AUU	5UTR	AT1G49760.1	266	AUG	Annotated TIS
Solyc01g109700.3.1	257	GUG	5UTR	AT1G49760.1	143	AUU	5UTR
Solyc01g109710.3.1	104	ACG	5UTR	AT1G49760.1	111	AUU	5UTR
Solyc01g109850.3.1	85	AUG	Annotated TIS	AT1G49760.1	57	CUG	5UTR
Solyc01g109870.3.1	185	AUG	5UTR	AT1G49760.1	160	UUG	5UTR
Solyc01g109870.3.1	103	AUG	5UTR	AT1G49760.1	82	CUG	5UTR
Solyc01g109890.3.1	189	AUG	5UTR	AT1G49850.1	127	CUG	5UTR
Solyc01g109890.3.1	373	UUG	5UTR	AT1G49850.1	321	AUG	CDS
Solyc01g109890.3.1	422	AUG	Annotated TIS	AT1G49950.1	118	AUU	5UTR
Solyc01g109910.3.1	211	AUG	5UTR	AT1G49950.1	142	AUG	5UTR
Solyc01g109910.3.1	88	ACG	5UTR	AT1G49970.1	193	AUG	Annotated TIS
Solyc01g109930.3.1	165	AUG	Annotated TIS	AT1G49970.1	148	AUC	5UTR
Solyc01g109940.3.1	112	AUG	CDS	AT1G49980.1	2123	AUG	3UTR
Solyc01g109960.3.1	223	AUG	5UTR	AT1G50010.1	152	AUG	Annotated TIS
Solyc01g109980.3.1	321	AUG	Annotated TIS	AT1G50020.1	147	AUG	5UTR
Solyc01g109980.3.1	144	AUG	5UTR	AT1G50020.1	95	AUA	5UTR
Solyc01g109990.3.1	184	AUG	Annotated TIS	AT1G50020.1	182	AUG	Annotated TIS
Solyc01g109990.3.1	123	AUU	5UTR	AT1G50030.1	201	AUA	5UTR
Solyc01g110000.3.1	194	AUG	5UTR	AT1G50040.1	133	CUG	5UTR
Solyc01g110000.3.1	164	AUG	5UTR	AT1G50110.1	173	AUG	Annotated TIS
Solyc01g110000.3.1	434	AUG	Annotated TIS	AT1G50140.1	106	AUG	5UTR
Solyc01g110020.3.1	107	AUG	5UTR	AT1G50170.1	90	AUG	Annotated TIS
Solyc01g110060.3.1	168	AUG	Annotated TIS	AT1G50200.2	313	AUG	CDS
Solyc01g110110.3.1	26	AUG	Annotated TIS	AT1G50250.1	226	AUG	Annotated TIS
Solyc01g110120.3.1	285	AUG	Annotated TIS	AT1G50300.1	184	AUG	5UTR
Solyc01g110130.3.1	54	CUG	5UTR	AT1G50320.1	73	AUG	Annotated TIS
Solyc01g110130.3.1	100	AUG	Annotated TIS	AT1G50350.1	112	AUG	Annotated TIS
Solyc01g110150.2.1	85	AUG	CDS	AT1G50370.1	252	AUG	5UTR
Solyc01g110160.3.1	40	AUG	CDS	AT1G50370.1	390	GAU	CDS
Solyc01g110270.3.1	66	AUG	CDS	AT1G50380.2	17	AUG	Annotated TIS
Solyc01g110270.3.1	42	AUG	CDS	AT1G50380.2	90	AUA	CDS
Solyc01g110280.3.1	170	AUG	Annotated TIS	AT1G50410.1	217	AUG	Annotated TIS
Solyc01g110290.3.1	154	ACG	5UTR	AT1G50420.1	329	GUG	5UTR
Solyc01g110300.3.1	115	CUG	5UTR	AT1G50420.1	396	UUG	5UTR
Solyc01g110300.3.1	157	AUG	Annotated TIS	AT1G50420.1	416	AUC	5UTR
Solyc01g110300.3.1	45	AUU	5UTR	AT1G50430.1	34	UUG	5UTR
Solyc01g110310.3.1	207	AUG	Annotated TIS	AT1G50440.1	73	AUG	5UTR
Solyc01g110310.3.1	162	AUA	5UTR	AT1G50440.1	154	AUG	5UTR
Solyc01g110360.3.1	145	AUG	Annotated TIS	AT1G50450.1	156	AUG	Annotated TIS
Solyc01g110370.3.1	239	AUG	Annotated TIS	AT1G50460.1	149	CUG	5UTR
Solyc01g110370.3.1	158	AUG	5UTR	AT1G50490.1	355	AUG	Annotated TIS
Solyc01g110400.2.1	149	AUG	Annotated TIS	AT1G50490.1	271	CUG	5UTR
Solyc01g110410.3.1	145	AUG	Annotated TIS	AT1G50490.1	331	CUG	5UTR
Solyc01g110410.3.1	84	CUG	5UTR	AT1G50490.1	224	UUG	5UTR
Solyc01g110440.4.1	696	CUG	5UTR	AT1G50500.2	137	AUG	Annotated TIS
Solyc01g110440.4.1	777	AUG	5UTR	AT1G50500.2	89	AUU	5UTR
Solyc01g110440.4.1	727	AUU	5UTR	AT1G50510.1	119	AUG	Annotated TIS
Solyc01g110480.3.1	127	AUA	5UTR	AT1G50570.1	177	GUG	5UTR
Solyc01g110490.3.1	56	AUG	Annotated TIS	AT1G50600.2	316	AUG	CDS
Solyc01g110520.3.1	1	AUG	Annotated TIS	AT1G50600.2	228	AUC	CDS
Solyc01g110530.3.1	159	AUG	Annotated TIS	AT1G50600.2	206	UUG	CDS
Solyc01g110530.3.1	97	CUG	5UTR	AT1G50620.1	133	AUU	5UTR
Solyc01g110530.3.1	44	AUG	5UTR	AT1G50620.1	176	AUU	5UTR
Solyc01g110530.3.1	62	AUG	5UTR	AT1G50620.1	250	CUG	5UTR
Solyc01g110540.3.1	138	AUG	Annotated TIS	AT1G50640.1	430	AUG	Annotated TIS
Solyc01g110550.3.1	71	AUG	Annotated TIS	AT1G50660.1	350	CUG	5UTR
Solyc01g110605.1.1	133	AUG	CDS	AT1G50660.1	310	UUG	5UTR
Solyc01g110647.1.1	1	AUG	Annotated TIS	AT1G50670.1	245	AUG	Annotated TIS
Solyc01g110660.3.1	43	AUG	CDS	AT1G50700.2	81	AUG	5UTR
Solyc01g110670.3.1	708	AUG	Annotated TIS	AT1G50710.1	188	AUG	Annotated TIS
Solyc01g110710.3.1	1	AUG	Annotated TIS	AT1G50730.1	66	AUG	Annotated TIS
Solyc01g110780.1.1	1	AUG	Annotated TIS	AT1G50740.1	190	AUG	Annotated TIS
Solyc01g110790.3.1	1	AUG	Annotated TIS	AT1G50740.1	138	CUG	5UTR
Solyc01g110800.3.1	1	AUG	Annotated TIS	AT1G50790.1	150	AUG	Annotated TIS
Solyc01g110913.1.1	1	AUG	Annotated TIS	AT1G50830.1	165	AUG	Annotated TIS
Solyc01g110917.1.1	1	AUG	Annotated TIS	AT1G50840.2	66	AUG	5UTR
Solyc01g110920.3.1	1	AUG	Annotated TIS	AT1G50890.1	210	AUU	5UTR
Solyc01g110930.1.1	1	AUG	Annotated TIS	AT1G50890.1	259	AUG	5UTR
Solyc01g110940.3.1	1	AUG	Annotated TIS	AT1G50900.1	76	AUG	Annotated TIS
Solyc01g110960.3.1	289	AUG	CDS	AT1G50910.1	95	AUG	Annotated TIS
Solyc01g110960.3.1	388	AUG	CDS	AT1G50910.1	182	AUG	CDS
Solyc01g110980.3.1	1	AUG	Annotated TIS	AT1G50920.1	141	ACG	5UTR
Solyc01g111000.3.1	1	AUG	Annotated TIS	AT1G50920.1	199	AUG	Annotated TIS
Solyc01g111010.3.1	1	AUG	Annotated TIS	AT1G50940.1	74	AUG	Annotated TIS
Solyc01g111020.3.1	13	AUG	5UTR	AT1G50950.2	59	AUG	5UTR
Solyc01g111020.3.1	81	AUG	Annotated TIS	AT1G50950.2	294	AUG	Annotated TIS
Solyc01g111040.3.1	302	CUG	CDS	AT1G50970.1	1	AUG	Annotated TIS
Solyc01g111040.3.1	76	AUG	Annotated TIS	AT1G51060.1	138	AUG	Annotated TIS
Solyc01g111060.3.1	69	AUG	Annotated TIS	AT1G51060.1	83	AUU	5UTR
Solyc01g111090.3.1	112	CUG	5UTR	AT1G51070.2	142	AUG	Annotated TIS
Solyc01g111120.3.1	86	AUG	Annotated TIS	AT1G51070.2	94	UUG	5UTR
Solyc01g111140.3.1	130	AUC	5UTR	AT1G51080.1	131	AUG	CDS
Solyc01g111145.1.1	150	AUG	Annotated TIS	AT1G51080.1	241	AUG	CDS
Solyc01g111150.2.1	135	AUG	Annotated TIS	AT1G51100.1	44	AUG	Annotated TIS
Solyc01g111170.3.1	1	AUG	Annotated TIS	AT1G51100.1	157	AUG	CDS
Solyc01g111200.3.1	71	AUG	Annotated TIS	AT1G51110.1	80	AUG	Annotated TIS
Solyc01g111240.3.1	130	ACG	5UTR	AT1G51130.1	160	AUG	Annotated TIS
Solyc01g111260.2.1	34	AUG	5UTR	AT1G51140.1	200	AUG	Annotated TIS
Solyc01g111260.2.1	114	AUG	Annotated TIS	AT1G51160.1	113	AUG	Annotated TIS
Solyc01g111350.3.1	267	AUG	Annotated TIS	AT1G51200.1	251	AUC	5UTR
Solyc01g111360.3.1	85	AUG	5UTR	AT1G51200.1	310	AUG	Annotated TIS
Solyc01g111370.3.1	72	AUG	Annotated TIS	AT1G51200.1	229	CUG	5UTR
Solyc01g111420.3.1	141	AUG	Annotated TIS	AT1G51310.1	74	AUG	Annotated TIS
Solyc01g111440.3.1	1	AUG	Annotated TIS	AT1G51340.2	228	CUG	5UTR
Solyc01g111450.3.1	178	AUA	5UTR	AT1G51340.2	398	AUG	5UTR
Solyc01g111450.3.1	201	AUG	Annotated TIS	AT1G51340.2	592	AUG	5UTR
Solyc01g111450.3.1	149	CUG	5UTR	AT1G51340.2	344	UUG	5UTR
Solyc01g111500.3.1	404	AUG	CDS	AT1G51350.1	208	AUG	Annotated TIS
Solyc01g111500.3.1	340	AUG	Annotated TIS	AT1G51360.1	46	AUG	Annotated TIS
Solyc01g111510.3.1	214	AUG	Annotated TIS	AT1G51380.1	255	UUG	5UTR
Solyc01g111520.3.1	156	AUG	Annotated TIS	AT1G51390.1	130	AUG	Annotated TIS
Solyc01g111520.3.1	60	AUG	5UTR	AT1G51400.1	91	AUG	Annotated TIS
Solyc01g111520.3.1	108	AUG	5UTR	AT1G51450.1	72	AUG	Annotated TIS
Solyc01g111530.3.1	464	AUG	Annotated TIS	AT1G51450.1	42	CUG	5UTR
Solyc01g111530.3.1	406	AUG	5UTR	AT1G51510.1	289	CAU	CDS
Solyc01g111580.3.1	240	CUG	5UTR	AT1G51510.1	127	AUC	5UTR
Solyc01g111590.3.1	1	AUG	Annotated TIS	AT1G51510.1	181	AUG	Annotated TIS
Solyc01g111600.3.1	30	AUG	Annotated TIS	AT1G51538.1	102	AUG	CDS
Solyc01g111610.3.1	147	AUG	Annotated TIS	AT1G51540.1	92	GUG	5UTR
Solyc01g111620.3.1	312	AUG	Annotated TIS	AT1G51550.1	92	AUG	Annotated TIS
Solyc01g111650.3.1	88	AUG	CDS	AT1G51560.1	180	AUG	Annotated TIS
Solyc01g111660.3.1	56	UUG	CDS	AT1G51570.1	486	AUG	5UTR
Solyc01g111660.3.1	73	AUG	CDS	AT1G51570.1	643	GUG	5UTR
Solyc01g111670.3.1	1	AUG	Annotated TIS	AT1G51570.1	688	AUG	Annotated TIS
Solyc01g111710.3.1	268	AUG	Annotated TIS	AT1G51570.1	425	AUG	5UTR
Solyc01g111720.3.1	89	AUG	CDS	AT1G51590.1	88	AUC	5UTR
Solyc01g111730.3.1	269	AUG	5UTR	AT1G51590.1	131	AUG	5UTR
Solyc01g111730.3.1	188	AUG	5UTR	AT1G51600.1	456	UGA	5UTR
Solyc01g111730.3.1	144	AUA	5UTR	AT1G51600.1	324	GUG	5UTR
Solyc01g111750.3.1	2540	AUG	Annotated TIS	AT1G51600.1	412	AUU	5UTR
Solyc01g111760.3.1	263	AUG	Annotated TIS	AT1G51610.1	393	AUG	5UTR
Solyc01g111760.3.1	112	AUC	5UTR	AT1G51610.1	412	AUG	Annotated TIS
Solyc01g111810.3.1	1045	AUG	CDS	AT1G51610.1	231	AUC	5UTR
Solyc01g111830.3.1	140	AUG	CDS	AT1G51610.1	269	AUU	5UTR
Solyc01g111830.3.1	1	AUG	Annotated TIS	AT1G51650.1	173	AUG	Annotated TIS
Solyc01g111910.3.1	133	AUG	Annotated TIS	AT1G51710.1	425	CAA	CDS
Solyc01g111937.1.1	582	AUG	5UTR	AT1G51720.1	137	CUG	5UTR
Solyc01g111937.1.1	532	CUG	5UTR	AT1G51720.1	184	AUG	5UTR
Solyc01g111980.3.1	1053	AUG	Annotated TIS	AT1G51720.1	93	UUG	5UTR
Solyc01g111990.3.1	77	ACG	5UTR	AT1G51720.1	342	AUG	5UTR
Solyc01g111990.3.1	111	AUG	Annotated TIS	AT1G51730.1	168	AUG	Annotated TIS
Solyc01g112000.3.1	58	AUG	Annotated TIS	AT1G51740.1	169	AUU	5UTR
Solyc01g112020.3.1	346	GAA	CDS	AT1G51740.1	221	AUG	Annotated TIS
Solyc01g112020.3.1	226	AUG	Annotated TIS	AT1G51740.1	63	GUG	5UTR
Solyc01g112050.3.1	2296	AUG	Annotated TIS	AT1G51745.1	149	AUU	5UTR
Solyc01g112050.3.1	2318	AUG	CDS	AT1G51745.1	195	AUG	5UTR
Solyc01g112060.3.1	1	AUG	Annotated TIS	AT1G51760.1	168	AUU	5UTR
Solyc01g112080.3.1	331	AUG	Annotated TIS	AT1G51760.1	212	AUG	Annotated TIS
Solyc01g112100.3.1	94	AUG	5UTR	AT1G51980.1	148	AUG	Annotated TIS
Solyc01g112150.3.1	1	AUG	Annotated TIS	AT1G52160.1	160	AUC	CDS
Solyc01g112170.3.1	105	AUG	Annotated TIS	AT1G52160.1	209	AUG	CDS
Solyc01g112190.3.1	47	AUG	5UTR	AT1G52220.1	158	AGA	5UTR
Solyc01g112190.3.1	17	ACG	5UTR	AT1G52230.1	105	AUG	Annotated TIS
Solyc01g112250.3.1	281	AUG	5UTR	AT1G52260.1	151	AUU	5UTR
Solyc01g112260.3.1	26	AUG	Annotated TIS	AT1G52280.1	138	AUG	Annotated TIS
Solyc01g112260.3.1	68	AUG	CDS	AT1G52280.1	92	CUG	5UTR
Solyc01g112290.3.1	133	AUU	5UTR	AT1G52300.1	83	AUG	Annotated TIS
Solyc01g112320.3.1	470	AUG	5UTR	AT1G52340.1	124	AUG	Annotated TIS
Solyc01g112370.3.1	4	AUG	CDS	AT1G52340.1	71	GUG	5UTR
Solyc02g005200.3.1	105	AUG	CDS	AT1G52342.1	130	AUG	5UTR
Solyc02g005200.3.1	16	AUG	Annotated TIS	AT1G52342.1	420	AUG	Annotated TIS
Solyc02g005210.3.1	163	AUG	Annotated TIS	AT1G52360.2	22	AUG	5UTR
Solyc02g005480.3.1	166	AUG	Annotated TIS	AT1G52360.2	5	ACG	5UTR
Solyc02g005510.3.1	205	AUG	Annotated TIS	AT1G52380.1	171	UUG	5UTR
Solyc02g011800.1.1	97	AUU	CDS	AT1G52380.1	42	AUG	5UTR
Solyc02g011975.1.1	33	AUG	CDS	AT1G52420.1	97	CUG	5UTR
Solyc02g011990.1.1	132	AUU	CDS	AT1G52420.1	39	CUG	5UTR
Solyc02g012000.1.1	91	UUC	CDS	AT1G52500.2	167	CCG	CDS
Solyc02g012010.2.1	34	ACA	CDS	AT1G52520.1	333	AUG	Annotated TIS
Solyc02g014030.2.1	1	AUG	Annotated TIS	AT1G52530.1	203	AUG	Annotated TIS
Solyc02g014090.3.1	100	AUC	5UTR	AT1G52540.1	275	CUG	5UTR
Solyc02g014150.3.1	56	AUG	Annotated TIS	AT1G52540.1	324	CAA	CDS
Solyc02g014150.3.1	83	AUG	CDS	AT1G52550.1	61	AUG	Annotated TIS
Solyc02g014310.3.1	139	AUG	Annotated TIS	AT1G52590.1	51	AUG	Annotated TIS
Solyc02g014460.3.1	525	AUG	CDS	AT1G52600.1	131	CUG	5UTR
Solyc02g014520.3.1	9	AUG	5UTR	AT1G52600.1	179	AUG	Annotated TIS
Solyc02g014520.3.1	136	AUG	5UTR	AT1G52630.1	123	AUG	Annotated TIS
Solyc02g014830.3.1	136	AUG	Annotated TIS	AT1G52630.1	74	CUG	5UTR
Solyc02g014870.3.1	77	AUG	Annotated TIS	AT1G52640.1	25	AUG	Annotated TIS
Solyc02g020890.3.1	448	AUG	Annotated TIS	AT1G52670.1	89	AUC	5UTR
Solyc02g020910.3.1	868	AUG	5UTR	AT1G52670.1	192	AUG	Annotated TIS
Solyc02g020940.3.1	107	AUG	Annotated TIS	AT1G52670.1	151	AUU	5UTR
Solyc02g020980.3.1	105	UUG	5UTR	AT1G52710.1	38	AUG	5UTR
Solyc02g021000.3.1	220	AUG	CDS	AT1G52720.1	109	AUG	Annotated TIS
Solyc02g021000.3.1	144	AUG	Annotated TIS	AT1G52730.1	233	CUC	5UTR
Solyc02g021000.3.1	272	AUG	CDS	AT1G52730.1	317	AUU	5UTR
Solyc02g021140.3.1	98	AUG	Annotated TIS	AT1G52740.1	249	CCU	CDS
Solyc02g021400.2.1	128	CUG	5UTR	AT1G52740.1	114	GUG	5UTR
Solyc02g021400.2.1	152	AUG	Annotated TIS	AT1G52760.1	207	AUG	Annotated TIS
Solyc02g021420.3.1	746	AUU	5UTR	AT1G52780.1	233	AUG	Annotated TIS
Solyc02g021420.3.1	795	AUG	Annotated TIS	AT1G52825.1	121	GUG	5UTR
Solyc02g021430.1.1	36	AUG	CDS	AT1G52870.2	312	AUG	Annotated TIS
Solyc02g021430.1.1	1	AUG	Annotated TIS	AT1G52880.1	160	AUG	Annotated TIS
Solyc02g021430.1.1	81	AUG	CDS	AT1G52890.1	39	AUG	Annotated TIS
Solyc02g021440.3.1	120	UUG	5UTR	AT1G52905.1	184	AUG	Annotated TIS
Solyc02g021440.3.1	43	AUU	5UTR	AT1G52905.1	114	AUC	5UTR
Solyc02g021440.3.1	230	AUG	5UTR	AT1G52905.1	141	AUU	5UTR
Solyc02g021550.3.1	113	CUG	5UTR	AT1G52905.1	66	GUG	5UTR
Solyc02g021550.3.1	164	AUG	Annotated TIS	AT1G52905.1	92	AUU	5UTR
Solyc02g021560.3.1	1	AUG	Annotated TIS	AT1G52980.1	498	AUG	CDS
Solyc02g021640.3.1	319	CUG	5UTR	AT1G53025.2	179	CUG	5UTR
Solyc02g021650.3.1	135	AUG	5UTR	AT1G53035.2	83	AUG	5UTR
Solyc02g021650.3.1	209	GUG	5UTR	AT1G53035.2	37	AUG	5UTR
Solyc02g021700.3.1	142	AUG	CDS	AT1G53040.1	173	AUG	5UTR
Solyc02g022830.3.1	206	AUG	Annotated TIS	AT1G53050.1	337	AUG	5UTR
Solyc02g022850.1.1	1	AUG	Annotated TIS	AT1G53070.1	239	AUG	Annotated TIS
Solyc02g022930.3.1	538	AUG	Annotated TIS	AT1G53110.1	231	AAG	5UTR
Solyc02g023970.3.1	174	AUG	Annotated TIS	AT1G53120.1	48	AUG	Annotated TIS
Solyc02g023990.3.1	363	AUG	CDS	AT1G53140.1	84	AUG	Annotated TIS
Solyc02g023990.3.1	300	AUG	Annotated TIS	AT1G53190.1	156	AUU	5UTR
Solyc02g024000.3.1	203	AUG	5UTR	AT1G53190.1	98	CUG	5UTR
Solyc02g024020.3.1	198	UUG	5UTR	AT1G53190.1	225	AUG	5UTR
Solyc02g024050.3.1	206	AUG	Annotated TIS	AT1G53190.1	159	AGC	5UTR
Solyc02g027080.2.1	71	AUG	5UTR	AT1G53210.1	341	AUG	Annotated TIS
Solyc02g027080.2.1	145	AUG	Annotated TIS	AT1G53240.1	345	AUG	Annotated TIS
Solyc02g030080.3.1	210	AUG	Annotated TIS	AT1G53240.1	279	AUU	5UTR
Solyc02g030170.3.1	172	AUG	CDS	AT1G53260.1	69	AUG	5UTR
Solyc02g030250.3.1	113	CUG	5UTR	AT1G53280.1	190	AUG	CDS
Solyc02g030250.3.1	175	AUG	Annotated TIS	AT1G53280.1	141	ACG	CDS
Solyc02g030300.3.1	195	AUG	CDS	AT1G53300.1	151	AUG	5UTR
Solyc02g030300.3.1	249	CUG	CDS	AT1G53310.1	340	AAG	CDS
Solyc02g031710.3.1	214	AUG	CDS	AT1G53310.1	54	CUG	5UTR
Solyc02g031710.3.1	154	AUG	Annotated TIS	AT1G53320.1	76	AUG	Annotated TIS
Solyc02g031710.3.1	269	AUG	CDS	AT1G53380.1	250	CUG	5UTR
Solyc02g031740.3.1	100	AUG	Annotated TIS	AT1G53380.1	372	AUG	5UTR
Solyc02g031830.1.1	1	AUG	Annotated TIS	AT1G53400.1	244	AUG	5UTR
Solyc02g031840.3.1	735	AUG	Annotated TIS	AT1G53480.1	132	GUG	CDS
Solyc02g031860.3.1	71	ACG	5UTR	AT1G53480.1	185	AUG	CDS
Solyc02g031860.3.1	445	AUG	5UTR	AT1G53590.1	159	AUG	5UTR
Solyc02g031860.3.1	385	AUU	5UTR	AT1G53590.1	258	AUG	5UTR
Solyc02g031860.3.1	181	AUA	5UTR	AT1G53645.1	207	AUG	CDS
Solyc02g031900.2.1	177	AUU	5UTR	AT1G53645.1	170	AUG	Annotated TIS
Solyc02g031900.2.1	237	AUG	5UTR	AT1G53750.1	124	AUU	5UTR
Solyc02g031900.2.1	59	AUA	5UTR	AT1G53760.1	198	AUG	5UTR
Solyc02g031900.2.1	193	CUG	5UTR	AT1G53760.1	149	AUU	5UTR
Solyc02g031970.1.1	1	AUG	Annotated TIS	AT1G53770.2	51	AUG	Annotated TIS
Solyc02g031990.1.1	1	AUG	Annotated TIS	AT1G53830.1	41	AUG	Annotated TIS
Solyc02g032800.1.1	1	AUG	Annotated TIS	AT1G53850.1	198	AUG	Annotated TIS
Solyc02g032860.3.1	133	AUG	Annotated TIS	AT1G53850.1	402	GAA	CDS
Solyc02g032920.3.1	109	AUG	CDS	AT1G53850.1	145	GUG	5UTR
Solyc02g032930.3.1	109	AUG	Annotated TIS	AT1G53910.1	399	AUG	Annotated TIS
Solyc02g032950.3.1	44	AUG	Annotated TIS	AT1G53910.1	315	AUA	5UTR
Solyc02g032970.3.1	153	ACG	5UTR	AT1G54080.2	86	AUG	Annotated TIS
Solyc02g032970.3.1	203	AUG	5UTR	AT1G54100.1	235	AUG	Annotated TIS
Solyc02g033060.3.1	88	AUG	Annotated TIS	AT1G54115.1	259	AUG	5UTR
Solyc02g033060.3.1	119	AUG	CDS	AT1G54140.1	86	GUG	5UTR
Solyc02g036330.3.1	334	AUG	Annotated TIS	AT1G54170.1	318	AUG	Annotated TIS
Solyc02g036350.3.1	191	AUG	Annotated TIS	AT1G54170.1	236	ACG	5UTR
Solyc02g036450.3.1	221	AUG	Annotated TIS	AT1G54200.1	342	AUC	5UTR
Solyc02g036450.3.1	172	AUA	5UTR	AT1G54200.1	391	AUG	Annotated TIS
Solyc02g037530.3.1	197	AUG	5UTR	AT1G54200.1	302	AUU	5UTR
Solyc02g049070.3.1	94	AUG	Annotated TIS	AT1G54210.1	48	AUG	Annotated TIS
Solyc02g050205.1.1	202	AUG	CDS	AT1G54217.2	85	AUG	Annotated TIS
Solyc02g050205.1.1	88	AUG	Annotated TIS	AT1G54220.1	138	AUG	Annotated TIS
Solyc02g055565.1.1	109	AUG	Annotated TIS	AT1G54220.1	88	AUA	5UTR
Solyc02g061760.3.1	361	AUG	Annotated TIS	AT1G54250.1	225	UUU	CDS
Solyc02g061760.3.1	305	CUG	5UTR	AT1G54250.1	56	CUG	5UTR
Solyc02g061760.3.1	339	ACG	5UTR	AT1G54290.1	278	AUG	Annotated TIS
Solyc02g061790.3.1	40	AUG	Annotated TIS	AT1G54290.1	230	UUG	5UTR
Solyc02g061840.3.1	181	AUG	Annotated TIS	AT1G54320.1	189	AUG	Annotated TIS
Solyc02g061840.3.1	94	AUG	5UTR	AT1G54320.1	144	AUA	5UTR
Solyc02g061960.3.1	1305	AUU	5UTR	AT1G54390.2	44	AUG	5UTR
Solyc02g061980.3.1	400	AUG	Annotated TIS	AT1G54460.1	115	AUG	5UTR
Solyc02g061980.3.1	240	AUG	5UTR	AT1G54460.1	57	AUA	5UTR
Solyc02g061980.3.1	288	AUG	5UTR	AT1G54500.1	171	AUG	5UTR
Solyc02g062000.3.1	142	AUG	Annotated TIS	AT1G54580.1	226	AUG	Annotated TIS
Solyc02g062100.3.1	62	AUG	Annotated TIS	AT1G54610.1	158	AUA	5UTR
Solyc02g062230.1.1	1	AUG	Annotated TIS	AT1G54630.1	339	AUG	CDS
Solyc02g062330.2.1	19	AUG	5UTR	AT1G54630.1	248	AUG	Annotated TIS
Solyc02g062340.3.1	87	AUG	Annotated TIS	AT1G54690.1	30	AUC	5UTR
Solyc02g062340.3.1	43	AUA	5UTR	AT1G54690.1	20	AUC	5UTR
Solyc02g062350.3.1	27	AUG	5UTR	AT1G54710.1	276	AUG	5UTR
Solyc02g062350.3.1	94	AUA	5UTR	AT1G54770.1	254	AUG	Annotated TIS
Solyc02g062350.3.1	173	AUG	Annotated TIS	AT1G54770.1	180	CUG	5UTR
Solyc02g062370.3.1	130	AUG	5UTR	AT1G54780.1	151	AUG	Annotated TIS
Solyc02g062370.3.1	223	AUG	Annotated TIS	AT1G54830.1	184	AUU	5UTR
Solyc02g062420.3.1	118	AUG	Annotated TIS	AT1G54830.1	132	ACG	5UTR
Solyc02g062460.3.1	84	AUG	Annotated TIS	AT1G54850.1	52	AUG	Annotated TIS
Solyc02g062500.3.1	80	AUG	Annotated TIS	AT1G54920.3	239	AUG	Annotated TIS
Solyc02g062570.3.1	62	AUG	Annotated TIS	AT1G54990.1	47	AUG	Annotated TIS
Solyc02g062580.3.1	81	AUG	Annotated TIS	AT1G55000.1	129	AUG	Annotated TIS
Solyc02g062580.3.1	62	UUG	5UTR	AT1G55080.1	81	AUG	Annotated TIS
Solyc02g062600.3.1	104	UUG	5UTR	AT1G55090.1	148	CUG	5UTR
Solyc02g062610.3.1	330	AUG	Annotated TIS	AT1G55140.1	51	AUG	Annotated TIS
Solyc02g062620.3.1	153	AUG	Annotated TIS	AT1G55150.2	161	AUG	5UTR
Solyc02g062680.3.1	526	AUG	5UTR	AT1G55150.2	76	ACG	5UTR
Solyc02g062690.3.1	253	AUG	Annotated TIS	AT1G55170.1	99	AUG	Annotated TIS
Solyc02g062700.3.1	91	AUG	Annotated TIS	AT1G55205.2	28	GGC	CDS
Solyc02g062720.3.1	201	AUG	Annotated TIS	AT1G55210.1	149	AUG	Annotated TIS
Solyc02g062740.3.1	99	AUG	5UTR	AT1G55280.2	262	AUG	CDS
Solyc02g062740.3.1	232	AUG	Annotated TIS	AT1G55300.2	155	CUG	5UTR
Solyc02g062920.3.1	115	AUG	Annotated TIS	AT1G55300.2	117	ACG	5UTR
Solyc02g062930.3.1	70	ACG	5UTR	AT1G55300.2	203	AUG	Annotated TIS
Solyc02g062940.3.1	421	AUG	5UTR	AT1G55310.3	87	AUG	Annotated TIS
Solyc02g062940.3.1	129	CUG	5UTR	AT1G55330.1	36	AUC	5UTR
Solyc02g062950.3.1	451	AUG	5UTR	AT1G55340.1	125	AUC	5UTR
Solyc02g062970.3.1	257	AUG	Annotated TIS	AT1G55340.1	249	UUG	5UTR
Solyc02g063000.3.1	55	AUU	5UTR	AT1G55350.5	212	UUG	5UTR
Solyc02g063000.3.1	113	AUG	Annotated TIS	AT1G55460.1	261	AUG	Annotated TIS
Solyc02g063010.3.1	292	AUG	Annotated TIS	AT1G55475.1	125	ACG	5UTR
Solyc02g063010.3.1	206	AUU	5UTR	AT1G55480.1	324	AUG	Annotated TIS
Solyc02g063030.3.1	552	AUG	5UTR	AT1G55490.1	131	AUG	Annotated TIS
Solyc02g063030.3.1	459	AUG	5UTR	AT1G55490.1	64	GUG	5UTR
Solyc02g063030.3.1	366	GUG	5UTR	AT1G55500.5	229	AUC	5UTR
Solyc02g063030.3.1	391	AUU	5UTR	AT1G55510.1	127	GUG	5UTR
Solyc02g063060.3.1	275	AUG	5UTR	AT1G55520.1	60	AUU	5UTR
Solyc02g063070.3.1	124	AUG	Annotated TIS	AT1G55520.1	443	CUG	CDS
Solyc02g063130.3.1	285	AUG	Annotated TIS	AT1G55520.1	209	CUG	5UTR
Solyc02g063130.3.1	183	AUA	5UTR	AT1G55530.1	219	AUU	5UTR
Solyc02g063150.3.1	16	AUA	5UTR	AT1G55530.1	292	AUC	5UTR
Solyc02g063150.3.1	70	AUG	Annotated TIS	AT1G55535.1	103	AUU	5UTR
Solyc02g063160.3.1	71	AUG	CDS	AT1G55535.1	220	AUG	5UTR
Solyc02g063170.3.1	270	AUG	Annotated TIS	AT1G55540.2	126	AUG	Annotated TIS
Solyc02g063220.3.1	167	AUG	5UTR	AT1G55540.2	79	AUC	5UTR
Solyc02g063220.3.1	354	AUG	Annotated TIS	AT1G55590.1	125	AUG	Annotated TIS
Solyc02g063240.3.1	247	AUG	Annotated TIS	AT1G55610.1	331	AUG	5UTR
Solyc02g063270.3.1	52	AUG	Annotated TIS	AT1G55610.1	286	UUG	5UTR
Solyc02g063300.3.1	127	AUG	Annotated TIS	AT1G55610.1	78	UUG	5UTR
Solyc02g063350.1.1	1	AUG	Annotated TIS	AT1G55630.1	143	AUG	5UTR
Solyc02g063380.1.1	1	AUG	Annotated TIS	AT1G55670.1	94	AUG	Annotated TIS
Solyc02g063390.3.1	13	AUG	Annotated TIS	AT1G55670.1	45	AUU	5UTR
Solyc02g063450.3.1	70	GUG	5UTR	AT1G55675.1	21	AUG	5UTR
Solyc02g063520.3.1	151	AUG	CDS	AT1G55675.1	194	AUG	5UTR
Solyc02g063542.1.1	220	CUG	CDS	AT1G55680.1	114	AUG	5UTR
Solyc02g063542.1.1	243	UUG	CDS	AT1G55680.1	227	AUG	Annotated TIS
Solyc02g063546.1.1	243	UUG	CDS	AT1G55680.1	589	AUC	CDS
Solyc02g063546.1.1	220	CUG	CDS	AT1G55690.1	185	AUC	5UTR
Solyc02g064550.3.1	606	AUG	Annotated TIS	AT1G55720.1	29	AUG	5UTR
Solyc02g064670.1.1	1	AUG	Annotated TIS	AT1G55760.1	163	AUG	5UTR
Solyc02g064680.3.1	773	AUG	Annotated TIS	AT1G55810.4	252	AUG	Annotated TIS
Solyc02g064700.3.1	479	CUG	CDS	AT1G55840.1	355	AUG	5UTR
Solyc02g064700.3.1	239	AUG	Annotated TIS	AT1G55840.1	272	UUG	5UTR
Solyc02g064730.3.1	140	CUG	5UTR	AT1G55840.1	467	AUG	Annotated TIS
Solyc02g064800.3.1	2698	AUG	5UTR	AT1G55840.1	448	AGA	5UTR
Solyc02g064940.1.1	1	AUG	Annotated TIS	AT1G55860.1	359	AUG	Annotated TIS
Solyc02g064960.3.1	197	AUG	5UTR	AT1G55860.1	210	UUG	5UTR
Solyc02g064960.3.1	263	AUG	5UTR	AT1G55860.1	74	ACG	5UTR
Solyc02g065060.3.1	201	AUG	5UTR	AT1G55880.1	108	AUG	Annotated TIS
Solyc02g065060.3.1	341	AUG	5UTR	AT1G55900.1	98	AUG	Annotated TIS
Solyc02g065070.3.1	3	AUG	5UTR	AT1G55900.1	101	GCG	CDS
Solyc02g065070.3.1	50	AUG	Annotated TIS	AT1G55900.1	47	CUG	5UTR
Solyc02g065110.3.1	978	AUG	CDS	AT1G55960.1	1714	AUA	3UTR
Solyc02g065170.3.1	690	AUG	Annotated TIS	AT1G55960.1	343	AUG	5UTR
Solyc02g065170.3.1	612	AUU	5UTR	AT1G56045.1	117	AUG	Annotated TIS
Solyc02g065170.3.1	639	UUG	5UTR	AT1G56070.1	112	AUG	Annotated TIS
Solyc02g065190.3.1	143	AUG	Annotated TIS	AT1G56110.1	60	AUG	Annotated TIS
Solyc02g065240.3.1	146	AUG	Annotated TIS	AT1G56140.1	131	AUG	Annotated TIS
Solyc02g065280.3.1	160	AUG	Annotated TIS	AT1G56150.1	122	AUG	Annotated TIS
Solyc02g065400.3.1	385	AUG	Annotated TIS	AT1G56170.1	329	AUG	Annotated TIS
Solyc02g065430.1.1	1	AUG	Annotated TIS	AT1G56190.1	155	AUG	5UTR
Solyc02g065470.1.1	1	AUG	Annotated TIS	AT1G56190.1	267	AUG	Annotated TIS
Solyc02g065500.3.1	82	AUG	5UTR	AT1G56190.1	102	AUG	5UTR
Solyc02g065540.2.1	183	AUG	5UTR	AT1G56200.1	66	AUG	Annotated TIS
Solyc02g065540.2.1	227	CUG	5UTR	AT1G56220.3	438	AUG	CDS
Solyc02g065540.2.1	138	AUG	5UTR	AT1G56260.1	44	AUG	5UTR
Solyc02g065540.2.1	275	AUG	Annotated TIS	AT1G56280.2	160	CUG	5UTR
Solyc02g065555.1.1	76	AUG	Annotated TIS	AT1G56280.2	76	AUC	5UTR
Solyc02g065580.3.1	291	AUG	Annotated TIS	AT1G56280.2	50	AUC	5UTR
Solyc02g065580.3.1	242	CUG	5UTR	AT1G56290.1	192	AUG	Annotated TIS
Solyc02g065610.3.1	58	AUG	CDS	AT1G56290.1	120	AAG	5UTR
Solyc02g065630.3.1	362	AUG	Annotated TIS	AT1G56290.1	147	CUG	5UTR
Solyc02g065680.3.1	281	AUG	5UTR	AT1G56300.1	165	AUG	5UTR
Solyc02g065680.3.1	382	AUG	Annotated TIS	AT1G56330.1	77	AUG	Annotated TIS
Solyc02g065700.3.1	238	AUG	5UTR	AT1G56330.1	27	ACG	5UTR
Solyc02g065770.3.1	394	AUG	5UTR	AT1G56340.1	80	AUG	Annotated TIS
Solyc02g065790.3.1	470	AUG	Annotated TIS	AT1G56350.1	98	AUG	Annotated TIS
Solyc02g066800.2.1	44	AUC	5UTR	AT1G56410.1	79	GAC	CDS
Solyc02g066910.3.1	313	AUG	5UTR	AT1G56410.1	91	AUC	CDS
Solyc02g066920.3.1	224	AUG	Annotated TIS	AT1G56420.1	146	AUC	5UTR
Solyc02g066930.3.1	232	AUG	Annotated TIS	AT1G56420.1	258	AUG	Annotated TIS
Solyc02g066940.3.1	247	AUG	Annotated TIS	AT1G56420.1	205	AUC	5UTR
Solyc02g066950.3.1	80	AUC	5UTR	AT1G56440.1	163	AUG	Annotated TIS
Solyc02g067030.3.1	203	AUG	5UTR	AT1G56450.1	338	AUG	Annotated TIS
Solyc02g067030.3.1	296	AUG	Annotated TIS	AT1G56450.1	286	AUC	5UTR
Solyc02g067050.3.1	1	AUG	Annotated TIS	AT1G56460.3	196	AUG	5UTR
Solyc02g067070.3.1	1	AUG	Annotated TIS	AT1G56580.1	316	AAG	CDS
Solyc02g067080.3.1	1	AUG	Annotated TIS	AT1G56590.1	160	AUG	Annotated TIS
Solyc02g067080.3.1	212	AUG	CDS	AT1G56610.1	405	AUG	CDS
Solyc02g067120.3.1	104	AUG	5UTR	AT1G56710.1	53	AUG	Annotated TIS
Solyc02g067120.3.1	231	AUG	5UTR	AT1G57540.1	116	AUG	Annotated TIS
Solyc02g067120.3.1	171	AUG	5UTR	AT1G57540.1	48	ACG	5UTR
Solyc02g067120.3.1	51	AUG	5UTR	AT1G57600.1	132	AUG	Annotated TIS
Solyc02g067160.3.1	261	AUG	5UTR	AT1G57620.1	164	CUG	5UTR
Solyc02g067160.3.1	360	AUG	Annotated TIS	AT1G57620.1	237	AUG	Annotated TIS
Solyc02g067180.3.1	160	GUG	5UTR	AT1G57660.1	198	GUC	CDS
Solyc02g067210.3.1	102	AUG	5UTR	AT1G57680.1	200	AUC	5UTR
Solyc02g067310.3.1	21	AUG	Annotated TIS	AT1G57680.1	362	CUG	5UTR
Solyc02g067310.3.1	148	AUG	CDS	AT1G57700.1	132	AUG	5UTR
Solyc02g067340.3.1	180	GUC	CDS	AT1G57720.1	451	AUG	Annotated TIS
Solyc02g067360.3.1	101	AUG	Annotated TIS	AT1G57730.1	80	AUG	Annotated TIS
Solyc02g067370.3.1	242	AUG	Annotated TIS	AT1G57765.2	96	AUC	5UTR
Solyc02g067370.3.1	178	ACG	5UTR	AT1G57765.2	143	AUG	Annotated TIS
Solyc02g067420.3.1	237	AUG	Annotated TIS	AT1G57820.1	214	AUG	Annotated TIS
Solyc02g067420.3.1	187	AUU	5UTR	AT1G57860.1	189	GUC	CDS
Solyc02g067530.3.1	107	AUG	Annotated TIS	AT1G57860.1	205	AUG	CDS
Solyc02g067540.3.1	74	AUG	5UTR	AT1G57860.1	154	AUA	CDS
Solyc02g067540.3.1	136	AUG	Annotated TIS	AT1G57990.1	165	AUG	Annotated TIS
Solyc02g067570.3.1	255	CUG	5UTR	AT1G58050.1	1	AUG	Annotated TIS
Solyc02g067610.1.1	1	AUG	Annotated TIS	AT1G58100.1	232	AUG	5UTR
Solyc02g067660.3.1	233	AUG	Annotated TIS	AT1G58160.1	1	AUG	Annotated TIS
Solyc02g067810.1.1	1	AUG	Annotated TIS	AT1G58160.1	122	AUG	CDS
Solyc02g067860.3.1	1	AUG	Annotated TIS	AT1G58220.1	298	AUG	Annotated TIS
Solyc02g067890.3.1	102	AUG	5UTR	AT1G58220.1	250	UUG	5UTR
Solyc02g067960.2.1	1	AUG	Annotated TIS	AT1G58230.1	93	AUG	5UTR
Solyc02g068010.3.1	472	AUG	Annotated TIS	AT1G58235.1	107	AUG	5UTR
Solyc02g068050.3.1	159	AUU	5UTR	AT1G58235.1	503	AUU	3UTR
Solyc02g068050.3.1	210	AUG	Annotated TIS	AT1G58235.1	384	AUG	3UTR
Solyc02g068080.3.1	87	AUG	5UTR	AT1G58250.2	67	GUG	5UTR
Solyc02g068080.3.1	210	AUG	Annotated TIS	AT1G58290.1	307	UUG	5UTR
Solyc02g068080.3.1	45	AUG	5UTR	AT1G58290.1	507	ACG	CDS
Solyc02g068090.3.1	121	AUG	Annotated TIS	AT1G58380.1	184	GCG	CDS
Solyc02g068100.3.1	2403	AUG	Annotated TIS	AT1G58380.1	355	CUA	CDS
Solyc02g068100.3.1	2372	AUG	5UTR	AT1G58440.1	135	AUG	Annotated TIS
Solyc02g068130.3.1	86	AUG	Annotated TIS	AT1G58684.1	87	AUG	Annotated TIS
Solyc02g068140.3.1	190	AUG	Annotated TIS	AT1G58684.1	261	CUA	CDS
Solyc02g068180.3.1	1	AUG	Annotated TIS	AT1G58983.1	22	AUG	Annotated TIS
Solyc02g068200.1.1	1	AUG	Annotated TIS	AT1G58983.1	196	CUA	CDS
Solyc02g068270.3.1	110	AUG	Annotated TIS	AT1G59359.1	261	CUA	CDS
Solyc02g068360.3.1	1034	AUG	3UTR	AT1G59359.1	87	AUG	Annotated TIS
Solyc02g068380.3.1	157	AUG	Annotated TIS	AT1G59540.1	59	AUG	Annotated TIS
Solyc02g068390.3.1	28	AUG	5UTR	AT1G59580.1	157	CUG	5UTR
Solyc02g068390.3.1	81	AUG	CDS	AT1G59590.1	273	AUG	Annotated TIS
Solyc02g068450.3.1	225	AUG	Annotated TIS	AT1G59600.1	281	AUG	CDS
Solyc02g068450.3.1	118	AUA	5UTR	AT1G59600.1	147	AUG	Annotated TIS
Solyc02g068490.3.1	64	AUG	5UTR	AT1G59610.1	189	UUG	5UTR
Solyc02g068640.3.1	199	AUG	5UTR	AT1G59620.1	2888	CUA	3UTR
Solyc02g068640.3.1	289	AUG	Annotated TIS	AT1G59660.1	16	AUG	Annotated TIS
Solyc02g068680.1.1	1	AUG	Annotated TIS	AT1G59700.1	998	GUG	3UTR
Solyc02g068710.3.1	3675	AUG	Annotated TIS	AT1G59740.1	117	AUA	5UTR
Solyc02g068720.3.1	312	AUG	5UTR	AT1G59740.1	180	GCA	5UTR
Solyc02g068720.3.1	194	AUA	5UTR	AT1G59760.1	177	AUG	Annotated TIS
Solyc02g068740.3.1	163	AUG	Annotated TIS	AT1G59820.1	295	AUG	Annotated TIS
Solyc02g068760.3.1	118	AUG	Annotated TIS	AT1G59830.1	98	AUC	5UTR
Solyc02g068770.3.1	127	AUG	CDS	AT1G59830.1	156	GUG	5UTR
Solyc02g068780.3.1	112	AUG	Annotated TIS	AT1G59830.1	52	AUG	5UTR
Solyc02g068900.3.1	255	AUG	CDS	AT1G59860.1	201	CUC	CDS
Solyc02g068910.3.1	116	AUG	5UTR	AT1G59870.1	186	UUG	5UTR
Solyc02g068920.3.1	206	ACG	5UTR	AT1G59890.2	262	AUG	5UTR
Solyc02g069010.3.1	241	AUG	CDS	AT1G59910.1	89	GUU	5UTR
Solyc02g069010.3.1	135	AUG	Annotated TIS	AT1G60030.1	319	CUG	5UTR
Solyc02g069060.3.1	1340	AUG	Annotated TIS	AT1G60070.2	151	AUG	5UTR
Solyc02g069100.3.1	45	AUG	Annotated TIS	AT1G60070.2	77	AUG	5UTR
Solyc02g069150.3.1	237	AUG	Annotated TIS	AT1G60080.1	113	AUC	5UTR
Solyc02g069150.3.1	200	AUC	5UTR	AT1G60080.1	165	GUG	5UTR
Solyc02g069180.3.1	604	AUG	Annotated TIS	AT1G60080.1	212	AUG	Annotated TIS
Solyc02g069230.3.1	1622	AUG	5UTR	AT1G60170.1	154	AUG	Annotated TIS
Solyc02g069260.3.1	108	AUG	Annotated TIS	AT1G60170.1	90	UUG	5UTR
Solyc02g069290.3.1	95	AUG	Annotated TIS	AT1G60200.1	112	GUG	5UTR
Solyc02g069290.3.1	48	AUG	5UTR	AT1G60200.1	160	AUG	Annotated TIS
Solyc02g069310.3.1	191	AUU	5UTR	AT1G60230.1	98	AUG	CDS
Solyc02g069310.3.1	226	AUG	5UTR	AT1G60420.1	225	AUG	Annotated TIS
Solyc02g069310.3.1	663	AUG	Annotated TIS	AT1G60430.1	312	AUG	Annotated TIS
Solyc02g069310.3.1	327	AUG	5UTR	AT1G60430.1	165	AUU	5UTR
Solyc02g069370.3.1	99	AUC	5UTR	AT1G60440.1	34	AUG	5UTR
Solyc02g069370.3.1	203	AUG	Annotated TIS	AT1G60560.1	101	AUG	Annotated TIS
Solyc02g069370.3.1	146	AUC	5UTR	AT1G60560.1	62	CUG	5UTR
Solyc02g069370.3.1	122	CUG	5UTR	AT1G60570.1	1	AUG	Annotated TIS
Solyc02g069380.3.1	211	ACG	5UTR	AT1G60620.1	290	CUG	5UTR
Solyc02g069410.3.1	341	CCA	CDS	AT1G60640.1	119	AUG	Annotated TIS
Solyc02g069410.3.1	5	AUG	Annotated TIS	AT1G60650.1	87	AUG	Annotated TIS
Solyc02g069460.3.1	252	AUG	Annotated TIS	AT1G60670.2	188	AUU	5UTR
Solyc02g069490.3.1	124	AUG	Annotated TIS	AT1G60670.2	97	AUU	5UTR
Solyc02g069510.1.1	1	AUG	Annotated TIS	AT1G60690.1	113	AUG	Annotated TIS
Solyc02g069570.3.1	76	AUG	5UTR	AT1G60710.1	206	AUA	5UTR
Solyc02g069580.3.1	491	AUA	5UTR	AT1G60710.1	148	AUC	5UTR
Solyc02g069580.3.1	211	AUG	5UTR	AT1G60730.3	44	AUA	5UTR
Solyc02g069580.3.1	330	AUU	5UTR	AT1G60730.3	103	AUG	Annotated TIS
Solyc02g069580.3.1	276	AUG	5UTR	AT1G60740.1	151	AUG	Annotated TIS
Solyc02g069610.3.1	387	AUG	Annotated TIS	AT1G60770.1	346	GCA	CDS
Solyc02g069620.3.1	121	AUG	CDS	AT1G60770.1	67	AUG	Annotated TIS
Solyc02g069630.3.1	3393	AUG	3UTR	AT1G60770.1	190	CAG	CDS
Solyc02g069660.3.1	497	AUG	5UTR	AT1G60770.1	115	ACA	CDS
Solyc02g069660.3.1	529	AUG	Annotated TIS	AT1G60780.1	198	AUG	5UTR
Solyc02g069720.3.1	439	AUG	Annotated TIS	AT1G60780.1	153	AUA	5UTR
Solyc02g069720.3.1	146	AUG	5UTR	AT1G60800.1	753	AUA	5UTR
Solyc02g069720.3.1	390	AUU	5UTR	AT1G60850.1	106	AUU	5UTR
Solyc02g069770.3.1	293	AUG	Annotated TIS	AT1G60870.1	361	AUU	5UTR
Solyc02g069770.3.1	239	CUG	5UTR	AT1G60870.1	415	AUG	Annotated TIS
Solyc02g069780.3.1	74	AUG	5UTR	AT1G60900.1	69	AUC	5UTR
Solyc02g069790.3.1	39	AUG	Annotated TIS	AT1G60900.1	115	AUG	Annotated TIS
Solyc02g069800.1.1	1	AUG	Annotated TIS	AT1G60940.1	326	AUG	Annotated TIS
Solyc02g069850.3.1	113	AUG	Annotated TIS	AT1G60950.1	259	AUG	Annotated TIS
Solyc02g069860.3.1	70	AUG	CDS	AT1G61010.1	106	AUG	Annotated TIS
Solyc02g069920.3.1	338	AUG	5UTR	AT1G61040.1	258	GUG	5UTR
Solyc02g069920.3.1	264	AUG	5UTR	AT1G61065.1	210	AUG	Annotated TIS
Solyc02g069940.3.1	422	AUU	5UTR	AT1G61100.1	150	AUG	Annotated TIS
Solyc02g069950.3.1	112	UUG	5UTR	AT1G61150.1	137	GUG	5UTR
Solyc02g069950.3.1	154	AUG	Annotated TIS	AT1G61150.1	294	ACG	CDS
Solyc02g069980.3.1	1	AUG	Annotated TIS	AT1G61210.1	22	CUG	5UTR
Solyc02g070040.1.1	1	AUG	Annotated TIS	AT1G61250.1	284	AUG	Annotated TIS
Solyc02g070050.3.1	202	CUG	5UTR	AT1G61250.1	238	AUA	5UTR
Solyc02g070050.3.1	103	AUA	5UTR	AT1G61260.1	304	AUC	5UTR
Solyc02g070050.3.1	235	AUG	Annotated TIS	AT1G61260.1	353	AUG	Annotated TIS
Solyc02g070230.2.1	100	AUG	CDS	AT1G61310.1	364	GUG	5UTR
Solyc02g070240.3.1	144	AUG	Annotated TIS	AT1G61340.1	72	AUA	5UTR
Solyc02g070250.3.1	157	AUG	CDS	AT1G61410.1	101	AUG	5UTR
Solyc02g070260.3.1	1725	AUG	5UTR	AT1G61520.1	213	AUC	5UTR
Solyc02g070310.3.1	128	AUG	Annotated TIS	AT1G61520.1	260	AUG	Annotated TIS
Solyc02g070420.2.1	62	AUG	Annotated TIS	AT1G61570.1	60	GAA	5UTR
Solyc02g070480.3.1	134	AUG	Annotated TIS	AT1G61580.1	41	AUG	Annotated TIS
Solyc02g070480.3.1	39	AUG	5UTR	AT1G61620.1	207	AUG	CDS
Solyc02g070490.3.1	1	AUG	Annotated TIS	AT1G61620.1	132	CUG	5UTR
Solyc02g070500.1.1	1	AUG	Annotated TIS	AT1G61620.1	179	AUG	Annotated TIS
Solyc02g070510.3.1	44	CUG	5UTR	AT1G61640.1	212	AUG	Annotated TIS
Solyc02g070510.3.1	87	AUG	Annotated TIS	AT1G61640.1	136	AUG	5UTR
Solyc02g070530.3.1	220	AUG	Annotated TIS	AT1G61660.1	94	AUG	5UTR
Solyc02g070540.3.1	105	AUG	Annotated TIS	AT1G61667.2	159	AUU	CDS
Solyc02g070560.3.1	48	AUA	5UTR	AT1G61670.1	276	AUG	Annotated TIS
Solyc02g070560.3.1	166	AUG	Annotated TIS	AT1G61670.1	190	AUG	5UTR
Solyc02g070560.3.1	100	AUG	5UTR	AT1G61670.1	242	AUG	5UTR
Solyc02g070570.3.1	116	AUG	Annotated TIS	AT1G61700.1	94	AUG	Annotated TIS
Solyc02g070570.3.1	81	AUC	5UTR	AT1G61700.1	50	AUC	5UTR
Solyc02g070580.1.1	1	AUG	Annotated TIS	AT1G61730.1	402	CCG	CDS
Solyc02g070630.3.1	158	AUC	5UTR	AT1G61730.1	138	AUG	Annotated TIS
Solyc02g070630.3.1	220	AUU	5UTR	AT1G61730.1	196	AUG	CDS
Solyc02g070640.3.1	172	AUG	Annotated TIS	AT1G61780.1	97	AUU	5UTR
Solyc02g070650.2.1	1	AUG	Annotated TIS	AT1G61790.1	175	AUG	Annotated TIS
Solyc02g070670.3.1	135	AUG	5UTR	AT1G61870.1	115	AUG	Annotated TIS
Solyc02g070760.3.1	126	AUG	Annotated TIS	AT1G62010.1	188	AUG	Annotated TIS
Solyc02g070770.3.1	94	AUG	Annotated TIS	AT1G62020.1	199	AUG	Annotated TIS
Solyc02g070780.3.1	169	AUG	CDS	AT1G62040.1	341	AUG	Annotated TIS
Solyc02g070790.3.1	50	AUG	Annotated TIS	AT1G62040.1	243	AUC	5UTR
Solyc02g070820.1.1	1	AUG	Annotated TIS	AT1G62085.1	150	AUG	5UTR
Solyc02g070877.1.1	226	AUG	5UTR	AT1G62180.1	262	AUG	5UTR
Solyc02g070940.1.1	1	AUG	Annotated TIS	AT1G62180.1	421	AUG	Annotated TIS
Solyc02g070950.1.1	1	AUG	Annotated TIS	AT1G62260.1	34	AUG	Annotated TIS
Solyc02g070980.1.1	1	AUG	Annotated TIS	AT1G62290.1	84	AUG	Annotated TIS
Solyc02g070990.1.1	1	AUG	Annotated TIS	AT1G62300.1	351	AUG	CDS
Solyc02g071000.1.1	1	AUG	Annotated TIS	AT1G62305.1	205	AUG	5UTR
Solyc02g071010.1.1	1	AUG	Annotated TIS	AT1G62390.1	106	UUG	5UTR
Solyc02g071030.2.1	1	AUG	Annotated TIS	AT1G62430.1	171	AUA	5UTR
Solyc02g071040.3.1	235	AUG	Annotated TIS	AT1G62670.1	158	AUG	Annotated TIS
Solyc02g071120.3.1	1364	AUA	5UTR	AT1G62750.1	127	AUG	Annotated TIS
Solyc02g071120.3.1	1396	GUG	5UTR	AT1G62780.1	130	AUG	Annotated TIS
[truncated: 9,912 more rows]
